# Supplementary material for: Risk of persistent and new clinical sequelae among adults aged 65 years and older during the post-acute phase of SARS-CoV-2 infection: retrospective cohort study
Source: PubMed Central journal article supplement — BMJ. 2022 Feb 9;376:e068414. doi: 10.1136/bmj-2021-068414 (PMC8828141; doi:10.1136/bmj-2021-068414), 2022-02-09
Supplement: cohk068414.ww.pdf [file cohk068414.ww.pdf]

## Supplementary Tables and Figures

[Figure 1a](#): 2019 Cohort Sample

[Figure 1b](#): Viral LRTI Cohort Sample

[Table 1](#): International Statistical Classification of Diseases and Related Health Problems, Tenth Revision (ICD-10) Diagnostic Codes Utilized to Identify Persistent and New Clinical Sequelae

[Figure 2a](#): Absolute Standardized Mean Difference Before and After Propensity Score Matching the SARS-CoV-2 Infection Group with the 2020 Comparison Group

[Figure 2b](#): Absolute Standardized Mean Difference Before and After Propensity Score Matching the SARS-CoV-2 Infection Group with the 2019 Comparison Group

[Figure 2c](#): Absolute Standardized Mean Difference Before and After Propensity Score Matching the SARS-CoV-2 Infection Group with the Viral LRTI Comparison Group

[Figure 2d](#): Absolute Standardized Mean Difference Before and After Propensity Score Matching the SARS-CoV-2 Infection Group with the 2019 Comparison Group and Exactly Matching Prior Dementia Comorbidity

[Table 2](#): Absolute Standardized Mean Difference After Propensity Score Matching the SARS-CoV-2 Infection Group with the 2020, 2019, and Viral LRTI Comparison Groups

[Table 3](#): First COVID-19 Clinical Diagnosis and PCR Test Timing Among Unmatched SARS-CoV-2 Group with Both Diagnostic Methods

[Figure 3](#): Distribution of Time Difference Between First COVID-19 Clinical Diagnosis and PCR Test Timing Among Unmatched SARS-CoV-2 Group with Both Diagnostic Methods

[Table 4a](#): Cumulative Incidence and Risk Difference per 100 Individuals for Clinical Sequelae in the Post-Acute Phase by SARS-CoV-2 Infection and Comparison Groups

[Table 4b](#): Incidence Rates and Hazard Ratio for Clinical Sequelae in the Post-Acute Phase by SARS-CoV-2 Infection and Comparison Groups

[Table 4c](#): Cumulative Incidence and Risk Difference per 100 Individuals for Clinical Sequelae in the Post-Acute Phase by SARS-CoV-2 Infection and 2019 Comparison Group Before and After Exactly Matching Prior Dementia Comorbidity

[Table 4d](#): Incidence Rates and Hazard Ratio for Clinical Sequelae in the Post-Acute Phase by SARS-CoV-2 Infection and 2019 Comparison Group Before and After Exactly Matching Prior Dementia Comorbidity

[Table 5a](#): Cumulative Incidence and Risk Difference per 100 Individuals of the SARS-CoV-2 and 2020 Comparison Group for Clinical Sequelae in the Post-Acute Phase by Age

[Table 5b](#): Cumulative Incidence and Risk Difference per 100 Individuals of the SARS-CoV-2 and 2020 Comparison Group for Clinical Sequelae in the Post-Acute Phase by Race

[Table 5c](#): Cumulative Incidence and Risk Difference per 100 Individuals of the SARS-CoV-2 and 2020 Comparison Group for Clinical Sequelae in the Post-Acute Phase by Gender

[Table 5d](#): Cumulative Incidence and Risk Difference per 100 Individuals of the SARS-CoV-2 and 2020 Comparison Group for Clinical Sequelae in the Post-Acute Phase by COVID Hospitalization

[Table 5e](#): Cumulative Incidence and Risk Difference per 100 Individuals of the SARS-CoV-2 and 2019 Comparison Group for Clinical Sequelae in the Post-Acute Phase by Age

[Table 5f](#): Cumulative Incidence and Risk Difference per 100 Individuals of the SARS-CoV-2 and 2019 Comparison Group for Clinical Sequelae in the Post-Acute Phase by Race

[Table 5g](#): Cumulative Incidence and Risk Difference per 100 Individuals of the SARS-CoV-2 and 2019 Comparison Group for Clinical Sequelae in the Post-Acute Phase by Gender

[Table 5h](#): Cumulative Incidence and Risk Difference per 100 Individuals of the SARS-CoV-2 and 2019 Comparison Group for Clinical Sequelae in the Post-Acute Phase by COVID Hospitalization

[Table 5i](#): Cumulative Incidence and Risk Difference per 100 Individuals of the SARS-CoV-2 and Viral LRTI Comparison Group for Clinical Sequelae in the Post-Acute Phase by Age

[Table 5j](#): Cumulative Incidence and Risk Difference per 100 Individuals of the SARS-CoV-2 and Viral LRTI Comparison Group for Clinical Sequelae in the Post-Acute Phase by Race

[Table 5k](#): Cumulative Incidence and Risk Difference per 100 Individuals of the SARS-CoV-2 and Viral LRTI Comparison Group for Clinical Sequelae in the Post-Acute Phase by Gender

[Table 5l](#): Cumulative Incidence and Risk Difference per 100 Individuals of the SARS-CoV-2 and Viral LRTI Comparison Group for Clinical Sequelae in the Post-Acute Phase by COVID Hospitalization

[Table 6a](#): Clinical Event Counts by Persistent and New Onset Outcomes of the Matched SARS-CoV-2 Group and 2020 Comparison Group

[Table 6b](#): Clinical Event Counts by Persistent and New Onset Outcomes of the Matched SARS-CoV-2 Group and 2019 Comparison Group

[Table 6c](#): Clinical Event Counts by Persistent and New Onset Outcomes of the Matched SARS-CoV-2 Group and Viral LRTI Comparison Group

Figure 1a: 2019 Cohort Sample

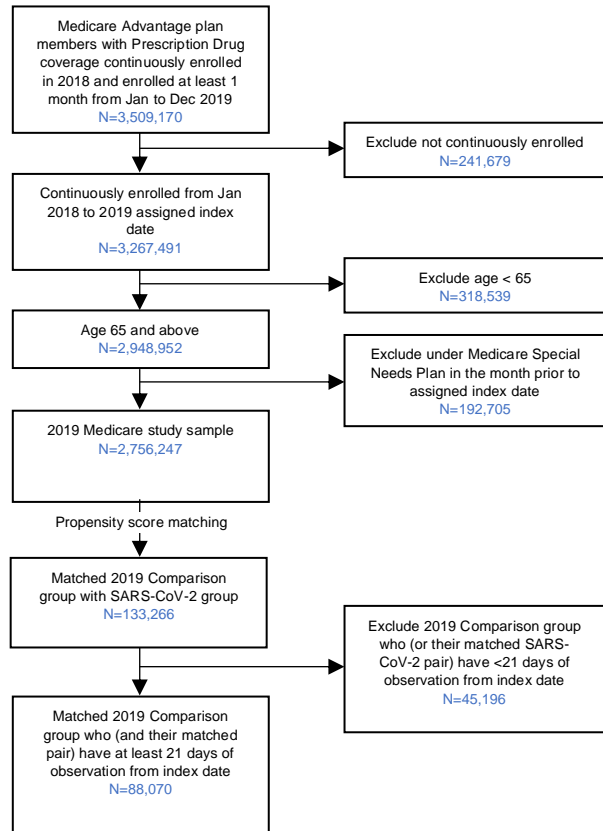

Figure 1b: Viral LRTI Cohort Sample

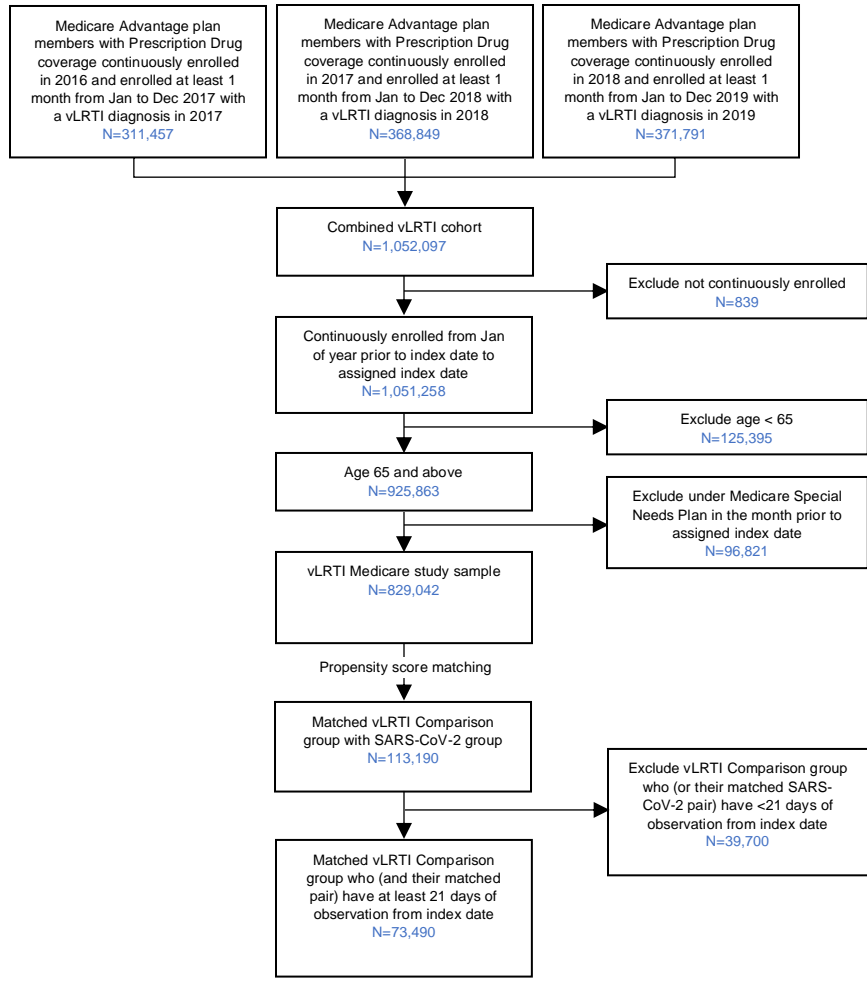

Table 1: International Statistical Classification of Diseases and Related Health Problems, Tenth Revision (ICD-10) Diagnostic Codes Utilized to Identify Persistent and New Clinical Sequelae

| <b>Hypertension</b>                                |                                                                                                                                           |
|----------------------------------------------------|-------------------------------------------------------------------------------------------------------------------------------------------|
| Hypertension                                       | I10, I11, I12, I13, I14, I15, I16                                                                                                         |
| Pulmonary Hypertension                             | I27                                                                                                                                       |
| <b>Cardiovascular Outcomes</b>                     |                                                                                                                                           |
| Cardiac Rhythm Disorders                           |                                                                                                                                           |
| > Cardiac Arrhythmia                               | I49                                                                                                                                       |
| > Tachycardia                                      | I47, R00.0                                                                                                                                |
| > Postural Orthostatic Tachycardia Syndrome (POTs) | I49.9                                                                                                                                     |
| CHF, Cardiomyopathy, Myocarditis                   |                                                                                                                                           |
| > Congestive Heart Failure                         | I50.3, I50.2                                                                                                                              |
| > Cardiomyopathy                                   | I42.4, I42.2, I42.3, I42.0, I25.5, I42.1, I43, I42.5, B33.24, A36.81, I42.9, I42.8                                                        |
| > Myocarditis                                      | I40, B33.22, I51.4                                                                                                                        |
| Coronary Disease                                   |                                                                                                                                           |
| > Myocardial Infarction                            | I21, I22                                                                                                                                  |
| > Acute Coronary Syndrome                          | I20.0, I21, I24                                                                                                                           |
| Cardiogenic Shock                                  | R57.0                                                                                                                                     |
| Hypercoagulability, DVT, PE, PAO                   |                                                                                                                                           |
| > Hypercoagulability                               | D68, I82                                                                                                                                  |
| > Deep Vein Thrombosis                             | I82                                                                                                                                       |
| > Pulmonary Embolism                               | I26.0, I26.9                                                                                                                              |
| > Peripheral Arterial Occlusions                   | E0852, E0952, E1052, E1152, E1352, I7401, I7409, I7410, I7411, I7419, I742, I743, I744, I745, I748, I749, I7501, I7502, I7581, I7589, I96 |
| Stroke and Sequelae                                |                                                                                                                                           |
| > Ischemic Stroke and Sequelae                     | H34.1, I63, I64, I69                                                                                                                      |

|                                         |                                                                                     |
|-----------------------------------------|-------------------------------------------------------------------------------------|
| > Hemorrhagic Stroke and Sequelae       | I60, I61, I62, I69                                                                  |
| <b>Mental Health</b>                    |                                                                                     |
| Mental Health Diagnosis*                |                                                                                     |
| > Anxiety Disorder                      | F41.1, F41.3, F41.8, F41.9<br><i>Remark: F41.0 is panic disorder, not included.</i> |
| > Depression Diagnosis                  | F32, F33                                                                            |
| > Post-traumatic Stress Disorder (PTSD) | F43.1                                                                               |
| > Mood Disorder                         | F34, F39                                                                            |
| Psychosis                               | F23, F29                                                                            |
| <b>Neurological Outcomes</b>            |                                                                                     |
| Amnesia/Memory Difficulty               | R41                                                                                 |
| Migraine                                | G43                                                                                 |
| Peripheral Neuropathy                   | G62.9, G63                                                                          |
| Encephalopathy                          | G93.4                                                                               |
| Seizures                                | G40                                                                                 |
| Dementia                                | G30, G31.0, F02, F01.5, F03                                                         |
| Guillain-Barre Syndrome                 | G61.0                                                                               |
| <b>Diabetes</b>                         |                                                                                     |
| Type 2 Diabetes (T2D) Diagnosis         | E11                                                                                 |
| <b>Liver</b>                            |                                                                                     |
| Liver Test Abnormality                  | I85, B18, I86.4, K70, K71, K72, K73, K74, K75, K76                                  |
| <b>Nephrology Outcomes</b>              |                                                                                     |
| Kidney Injury                           |                                                                                     |
| > Chronic Kidney Disease                | N18, I12, I13                                                                       |
| > Acute Kidney Injury                   | N17                                                                                 |
| <b>Pulmonary Outcomes</b>               |                                                                                     |
| Respiratory Failure                     |                                                                                     |
| > Acute Respiratory Failure             | J96.0                                                                               |

|                                  |                                    |
|----------------------------------|------------------------------------|
| > Chronic Respiratory Failure    | J96.1                              |
| > Interstitial Lung Disease      | J84                                |
| <b>Dermatologic Outcomes</b>     |                                    |
| Atopic Dermatitis Diagnosis      | L20                                |
| Urticaria                        | L50                                |
| Herpesviral Vesicular Dermatitis | B00.1                              |
| <b>Other Outcomes</b>            |                                    |
| Sleep Apnea                      | G47.3                              |
| <b>Hematology disorder</b>       |                                    |
| Thrombocytopenia                 | D69.6, D69.5, D75.82, D69.3, D69.4 |
| Leukopenia                       | D72.818, D72.819                   |
| Anemia                           | D50.0, D50.8, D50.9, D51, D52, D53 |
| <b>Symptoms</b>                  |                                    |
| Myalgia                          | B33, M79                           |
| <b>Fatigue Diagnosis</b>         |                                    |
| > Chronic Fatigue                | R53.82                             |
| > Fatigue                        | R53                                |
| > Post-viral Fatigue             | G93.3                              |
| Anosmia                          | R43.0                              |

Outcomes with ">" indicate inclusion under the grouped outcome above them.

\* Only the grouped outcome Mental Health Diagnosis and not the individual outcomes of Anxiety, Depression, PTSD, and Mood Disorder was reported in the analysis and accounted for in the Bonferroni correction.



Figure 2a: Absolute Standardized Mean Difference Before and After Propensity Score Matching the SARS-CoV-2 Infection Group with the 2020 Comparison Group

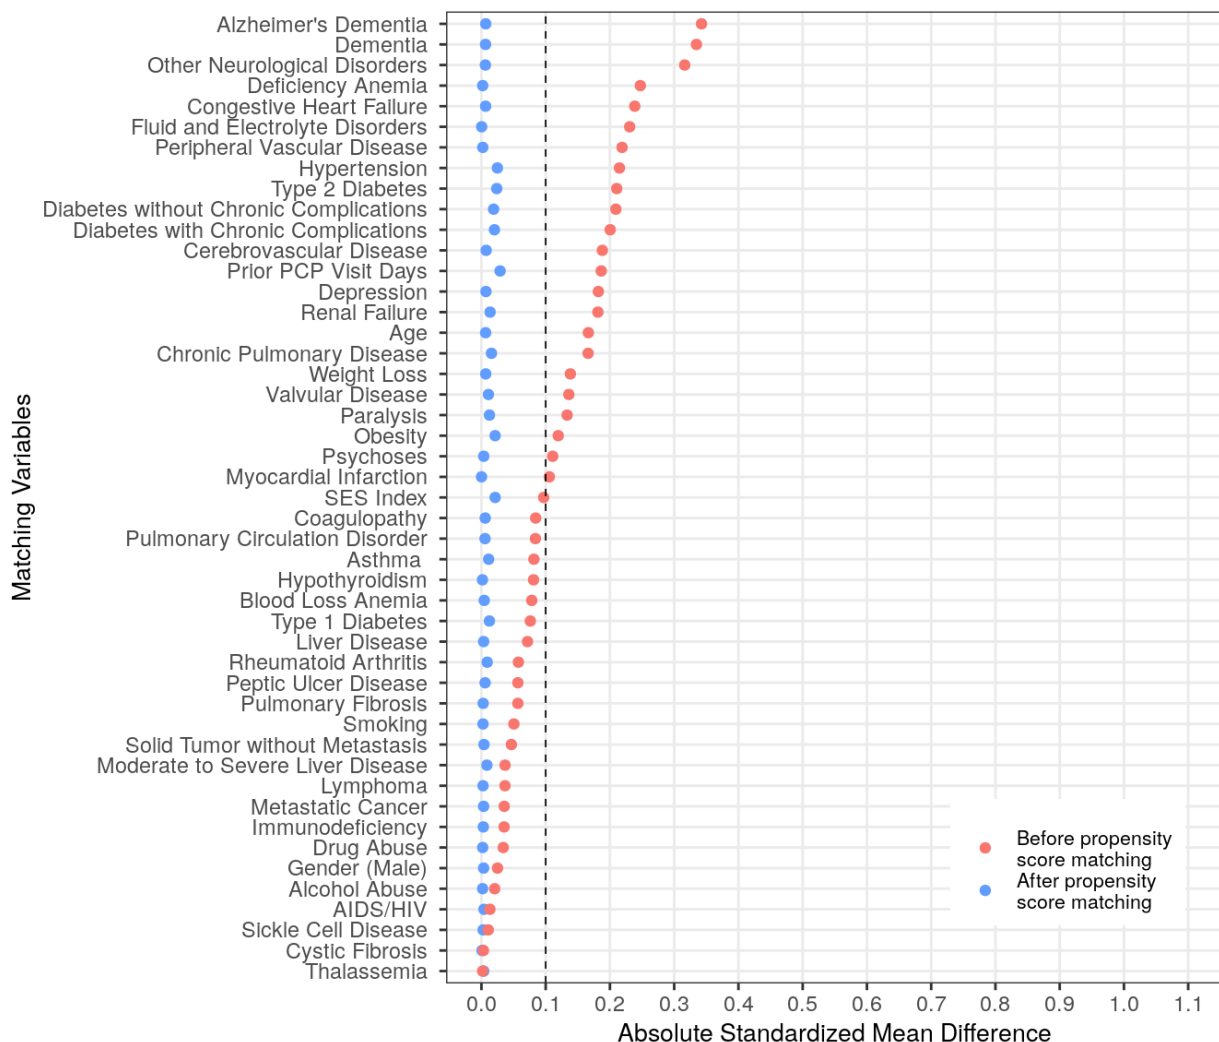

The absolute standardized mean differences after propensity score matching was obtained for the matched SARS-CoV-2 and 2020 comparison groups containing 87,337 matched pairs already filtered based on having at least 21 days of observation from the index date.

Figure 2b: Absolute Standardized Mean Difference Before and After Propensity Score Matching the SARS-CoV-2 Infection Group with the 2019 Comparison Group

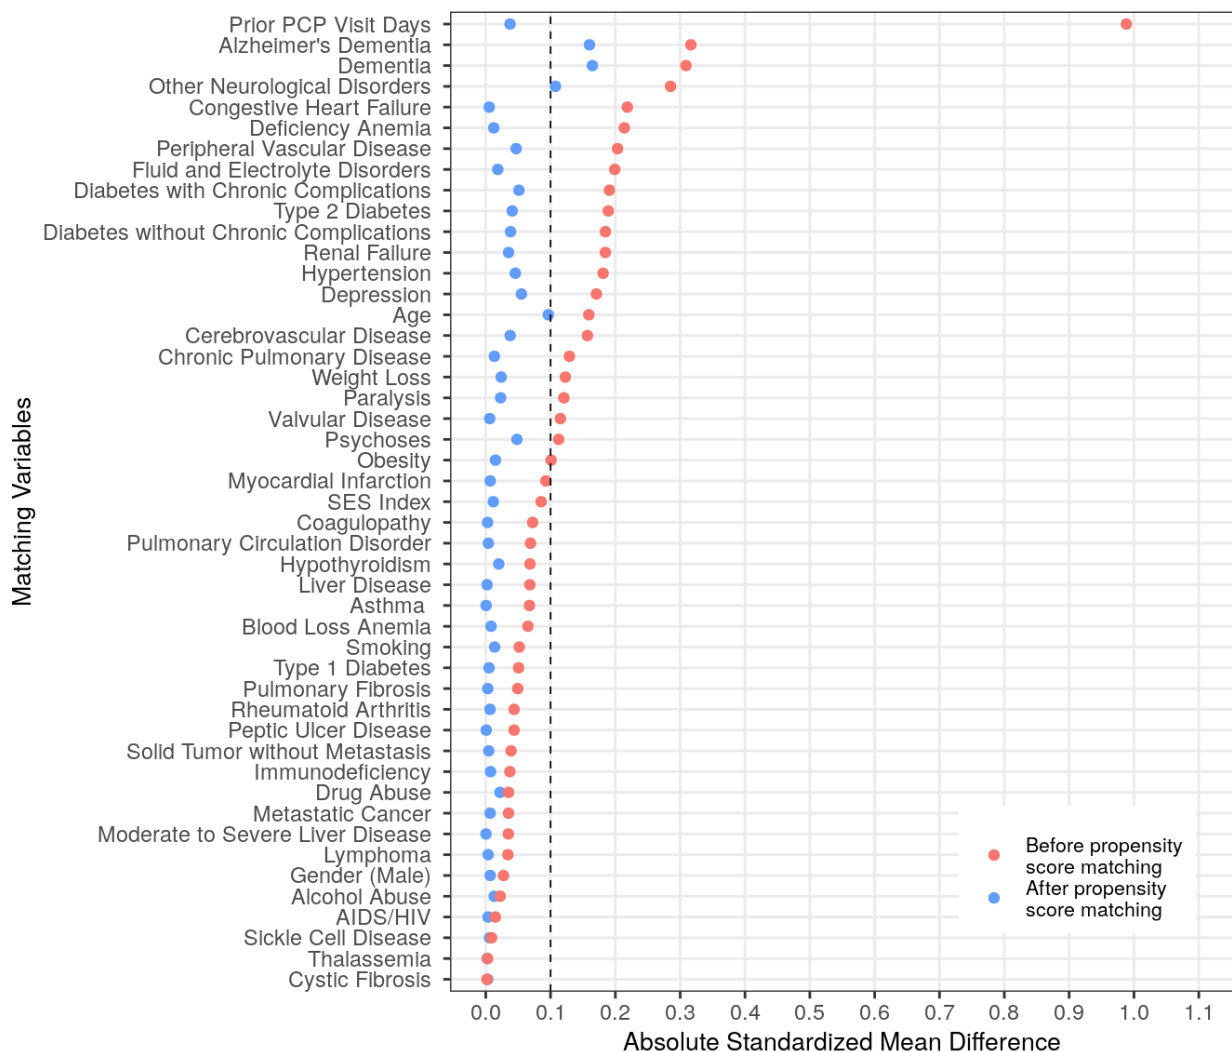

The absolute standardized mean differences after propensity score matching was obtained for the matched SARS-CoV-2 and 2019 comparison groups containing 88,070 matched pairs already filtered based on having at least 21 days of observation from the index date.

Figure 2c: Absolute Standardized Mean Difference Before and After Propensity Score Matching the SARS-CoV-2 Infection Group with the Viral LRTI Comparison Group

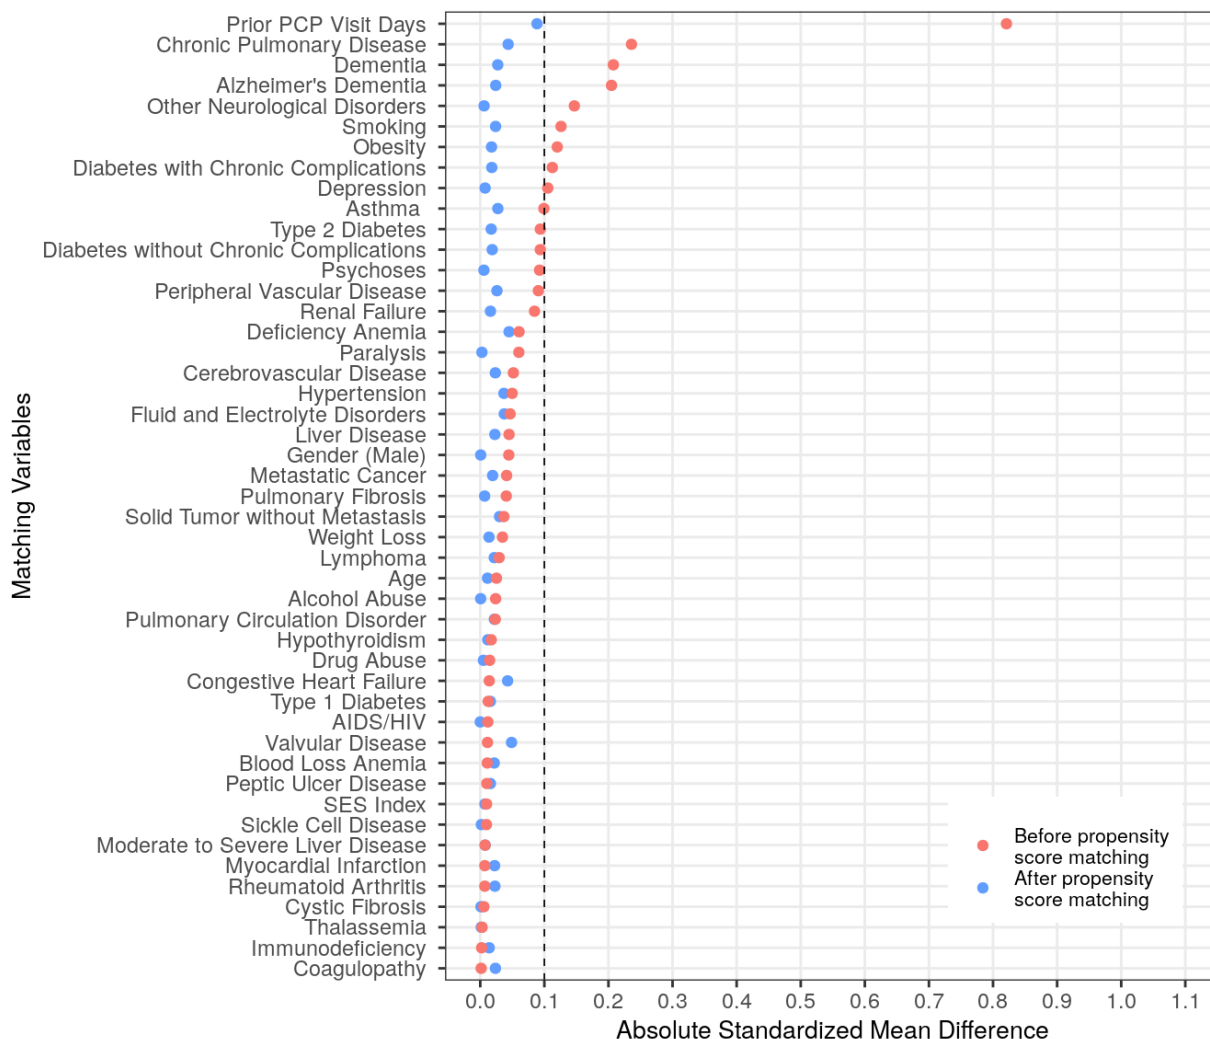

The absolute standardized mean differences after propensity score matching was obtained for the matched SARS-CoV-2 and vLRTI comparison groups containing 73,490 matched pairs already filtered based on having at least 21 days of observation from the index date.

Figure 2d: Absolute Standardized Mean Difference Before and After Propensity Score Matching the SARS-CoV-2 Infection Group with the 2019 Comparison Group and Exactly Matching Prior Dementia Comorbidity

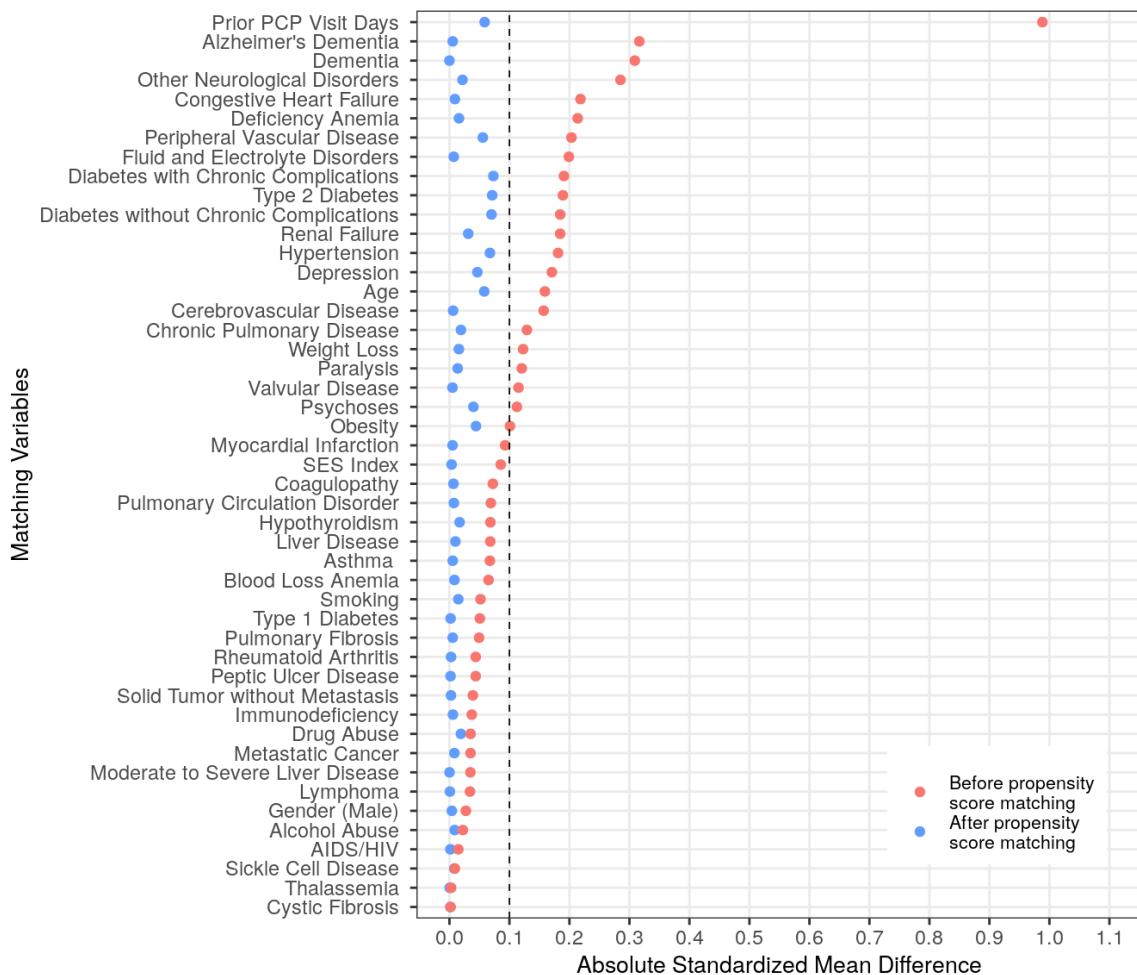

The absolute standardized mean differences after propensity score matching was obtained for the matched SARS-CoV-2 and 2019 comparison groups containing 63,945 matched pairs already filtered based on having at least 21 days of observation from the index date and having either both none or with prior dementia comorbidity.

Table 2: Absolute Standardized Mean Difference After Propensity Score Matching the SARS-CoV-2 Infection Group with the 2020, 2019, and Viral LRTI Comparison Groups

| <b>Matching Variables</b> | <b>SARS-CoV-2 Infected and 2020 Comparison Group</b> | <b>SARS-CoV-2 Infected and 2019 Comparison Group</b> | <b>SARS-CoV-2 Infected and Viral LRTI Comparison Group</b> |
|---------------------------|------------------------------------------------------|------------------------------------------------------|------------------------------------------------------------|
| Matched Group Size        | 87,337 vs 87,337                                     | 88,070 vs 88,070                                     | 73,490 vs 73,490                                           |
| <b>Age</b>                | 0.007                                                | 0.097                                                | 0.011                                                      |
| <b>Gender (Male)</b>      | 0.003                                                | 0.007                                                | 0.001                                                      |
| <b>SES Index</b>          | 0.021                                                | 0.012                                                | 0.007                                                      |
| <b>Race/Ethnicity</b>     |                                                      |                                                      |                                                            |
| White                     | 0.011                                                | 0.018                                                | 0.014                                                      |
| Black                     | 0.011                                                | 0.019                                                | 0.001                                                      |
| Asian                     | 0.002                                                | 0.007                                                | 0.009                                                      |
| Hispanic                  | 0.002                                                | 0.038                                                | 0.002                                                      |
| Native American           | 0.001                                                | 0.005                                                | 0.006                                                      |
| Other                     | 0.001                                                | 0.006                                                | 0.008                                                      |
| <b>Index Month</b>        |                                                      |                                                      |                                                            |
| January to March          | 0.003                                                | 0.015                                                | 0.088                                                      |
| April                     | 0.005                                                | 0.014                                                | 0.055                                                      |
| May                       | 0.003                                                | 0.018                                                | 0.041                                                      |
| June                      | 0.002                                                | 0.005                                                | 0.026                                                      |
| July                      | 0.002                                                | 0.003                                                | 0.016                                                      |
| August                    | 0.007                                                | 0.007                                                | 0.006                                                      |
| September                 | 0.005                                                | 0.000                                                | 0.022                                                      |
| October                   | 0.004                                                | 0.002                                                | 0.003                                                      |
| November                  | 0.007                                                | 0.027                                                | 0.047                                                      |
| <b>Prior Comorbidity</b>  |                                                      |                                                      |                                                            |
| AIDS/HIV                  | 0.004                                                | 0.004                                                | 0.000                                                      |
| Alcohol Abuse             | 0.002                                                | 0.013                                                | 0.001                                                      |
| Blood Loss Anemia         | 0.004                                                | 0.008                                                | 0.022                                                      |
| Cerebrovascular Disease   | 0.007                                                | 0.038                                                | 0.024                                                      |
| Chronic Pulmonary Disease | 0.016                                                | 0.013                                                | 0.043                                                      |
| Coagulopathy              | 0.006                                                | 0.003                                                | 0.024                                                      |
| Congestive Heart Failure  | 0.007                                                | 0.005                                                | 0.043                                                      |

|                                        |       |       |       |
|----------------------------------------|-------|-------|-------|
| Deficiency Anemia                      | 0.002 | 0.012 | 0.045 |
| Dementia                               | 0.006 | 0.165 | 0.027 |
| Depression                             | 0.007 | 0.055 | 0.008 |
| Diabetes with Chronic Complications    | 0.020 | 0.051 | 0.018 |
| Diabetes without Chronic Complications | 0.019 | 0.038 | 0.019 |
| Drug Abuse                             | 0.002 | 0.022 | 0.005 |
| Fluid and Electrolyte Disorders        | 0.000 | 0.019 | 0.037 |
| Hypertension                           | 0.025 | 0.046 | 0.037 |
| Hypothyroidism                         | 0.002 | 0.020 | 0.012 |
| Liver Disease                          | 0.003 | 0.002 | 0.023 |
| Lymphoma                               | 0.003 | 0.004 | 0.022 |
| Metastatic Cancer                      | 0.003 | 0.007 | 0.019 |
| Moderate to Severe Liver Disease       | 0.009 | 0.000 | 0.008 |
| Myocardial Infarction                  | 0.000 | 0.007 | 0.022 |
| Obesity                                | 0.021 | 0.015 | 0.018 |
| Other Neurological Disorders           | 0.006 | 0.108 | 0.006 |
| Paralysis                              | 0.013 | 0.023 | 0.003 |
| Peptic Ulcer Disease                   | 0.006 | 0.001 | 0.016 |
| Peripheral Vascular Disease            | 0.002 | 0.047 | 0.026 |
| Psychosis                              | 0.004 | 0.048 | 0.006 |
| Pulmonary Circulation Disorder         | 0.006 | 0.004 | 0.022 |
| Renal Failure                          | 0.014 | 0.035 | 0.016 |
| Rheumatoid Arthritis                   | 0.009 | 0.007 | 0.023 |
| Solid Tumor without Metastasis         | 0.004 | 0.005 | 0.030 |
| Valvular Disease                       | 0.011 | 0.006 | 0.049 |
| Weight Loss                            | 0.007 | 0.024 | 0.014 |
| <b>Prior Conditions</b>                |       |       |       |
| Alzheimer's Dementia                   | 0.007 | 0.160 | 0.024 |
| Asthma                                 | 0.011 | 0.001 | 0.027 |
| Cystic Fibrosis                        | 0.001 | 0.003 | 0.001 |

|                                                |       |       |       |
|------------------------------------------------|-------|-------|-------|
| Immunodeficiency                               | 0.003 | 0.007 | 0.014 |
| Pulmonary Fibrosis                             | 0.003 | 0.003 | 0.007 |
| Sickle Cell Disease                            | 0.003 | 0.006 | 0.002 |
| Smoking                                        | 0.002 | 0.014 | 0.024 |
| Thalassemia                                    | 0.004 | 0.002 | 0.002 |
| Type 1 Diabetes                                | 0.012 | 0.005 | 0.016 |
| Type 2 Diabetes                                | 0.024 | 0.041 | 0.017 |
| <b>Prior Inpatient Length of Stay</b>          | 0.021 | 0.002 | 0.020 |
| <b>Prior PCP Visit Days</b>                    | 0.029 | 0.038 | 0.089 |
| <b>Prior Cardiologist Visit Days</b>           | 0.002 | 0.079 | 0.104 |
| <b>Prior Nephrologist Visit Days</b>           | 0.014 | 0.073 | 0.060 |
| <b>History of Individual Clinical Sequelae</b> |       |       |       |
| Hypertension                                   | 0.022 | 0.044 | 0.046 |
| Pulmonary Hypertension                         | 0.007 | 0.011 | 0.026 |
| Cardiac Arrhythmia                             | 0.000 | 0.014 | 0.041 |
| Tachycardia                                    | 0.002 | 0.015 | 0.037 |
| POTs                                           | 0.003 | 0.020 | 0.025 |
| Congestive Heart Failure                       | 0.008 | 0.014 | 0.041 |
| Cardiomyopathy                                 | 0.007 | 0.011 | 0.033 |
| Myocarditis                                    | 0.004 | 0.002 | 0.005 |
| Myocardial Infarction                          | 0.006 | 0.025 | 0.023 |
| Acute Coronary Syndrome                        | 0.004 | 0.024 | 0.023 |
| Cardiogenic Shock                              | 0.001 | 0.005 | 0.011 |
| Hypercoagulability                             | 0.000 | 0.001 | 0.027 |
| Deep Vein Thrombosis                           | 0.001 | 0.005 | 0.020 |
| Pulmonary Embolism                             | 0.001 | 0.010 | 0.015 |
| Peripheral Arterial Occlusions                 | 0.010 | 0.011 | 0.013 |
| Ischemic Stroke                                | 0.001 | 0.010 | 0.011 |
| Hemorrhagic Stroke                             | 0.001 | 0.010 | 0.002 |
| Sequelae Cerebrovascular Disease               | 0.005 | 0.023 | 0.001 |
| Anxiety                                        | 0.001 | 0.016 | 0.017 |

|                                  |       |       |       |
|----------------------------------|-------|-------|-------|
| Depression                       | 0.004 | 0.050 | 0.008 |
| PTSD                             | 0.001 | 0.002 | 0.006 |
| Mood Disorder                    | 0.001 | 0.013 | 0.000 |
| Psychosis                        | 0.012 | 0.021 | 0.002 |
| Amnesia/Memory Difficulty        | 0.014 | 0.068 | 0.007 |
| Migraine                         | 0.004 | 0.004 | 0.007 |
| Peripheral Neuropathy            | 0.003 | 0.014 | 0.009 |
| Encephalopathy                   | 0.015 | 0.005 | 0.017 |
| Seizure                          | 0.006 | 0.014 | 0.002 |
| Dementia                         | 0.013 | 0.144 | 0.020 |
| Alzheimer                        | 0.009 | 0.108 | 0.017 |
| Guillain-Barre Syndrome          | 0.001 | 0.003 | 0.004 |
| Type 2 Diabetes                  | 0.021 | 0.042 | 0.020 |
| Liver Test Abnormality           | 0.000 | 0.001 | 0.021 |
| Chronic Kidney Disease           | 0.013 | 0.033 | 0.023 |
| Acute Kidney Injury              | 0.004 | 0.020 | 0.037 |
| Acute Respiratory Failure        | 0.008 | 0.024 | 0.025 |
| Chronic Respiratory Failure      | 0.004 | 0.014 | 0.016 |
| Interstitial Lung Disease        | 0.003 | 0.004 | 0.009 |
| Atopic Dermatitis                | 0.002 | 0.005 | 0.010 |
| Urticaria                        | 0.004 | 0.001 | 0.009 |
| Herpesviral Vesicular Dermatitis | 0.000 | 0.003 | 0.000 |
| Sleep Apnea                      | 0.014 | 0.001 | 0.029 |
| Thrombocytopenia                 | 0.005 | 0.005 | 0.019 |
| Leukopenia                       | 0.002 | 0.006 | 0.009 |
| Anemia                           | 0.009 | 0.009 | 0.039 |
| <b>State</b>                     |       |       |       |
| TX                               | 0.015 | 0.118 | 0.027 |
| FL                               | 0.011 | 0.121 | 0.046 |
| CA                               | 0.019 | 0.139 | 0.043 |
| NC                               | 0.009 | 0.070 | 0.006 |
| NY                               | 0.005 | 0.063 | 0.004 |
| AZ                               | 0.004 | 0.085 | 0.023 |
| IL                               | 0.010 | 0.060 | 0.025 |



|    |       |       |       |
|----|-------|-------|-------|
| GA | 0.016 | 0.032 | 0.014 |
| NJ | 0.014 | 0.017 | 0.001 |
| WI | 0.024 | 0.079 | 0.005 |

Matching Variables lists down all 120 covariates exactly used for matching.

This table only includes matched SARS-CoV-2 and comparison group pairs both having at least 21 days of observation from the index date.

State only includes the top 10 states of the SARS-CoV-2 group prior to matching.

Table 3: First COVID-19 Clinical Diagnosis and PCR Test Timing Among Unmatched SARS-CoV-2 Group with Both Diagnostic Methods

| Category                                     | Count (%)   |
|----------------------------------------------|-------------|
| COVID diagnosis first                        | 5,287 (33%) |
| PCR test and COVID diagnosis on the same day | 3,313 (20%) |
| PCR test first                               | 7,669 (47%) |

Figure 3: Distribution of Time Difference Between First COVID-19 Clinical Diagnosis and PCR Test Timing Among Unmatched SARS-CoV-2 Group with Both Diagnostic Methods

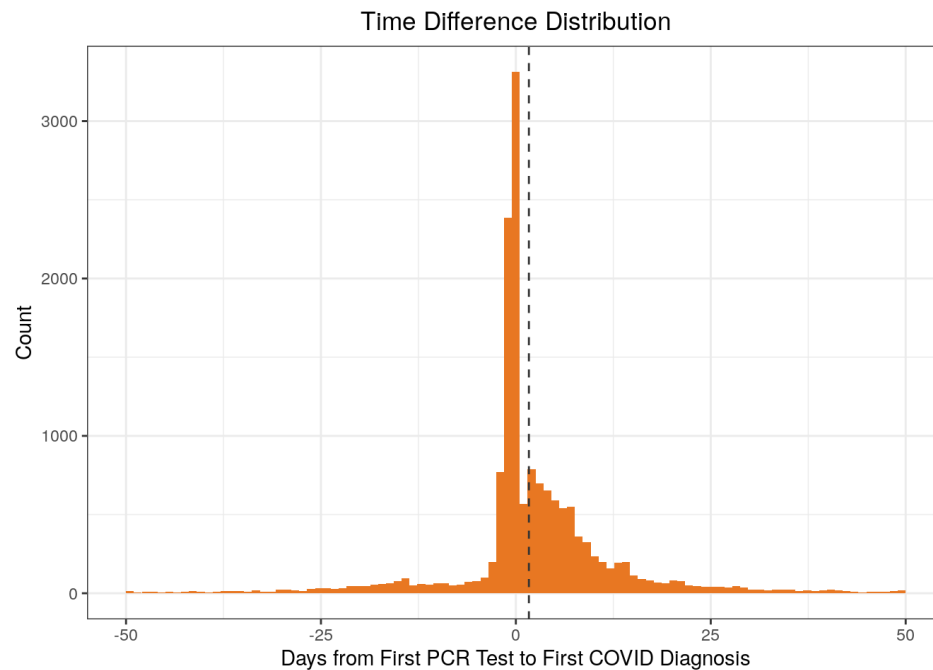

The mean (dashed line) time difference between first COVID-19 clinical diagnosis and PCR test is 1.7 days.

Table 4a: Cumulative Incidence and Risk Difference per 100 Individuals for Clinical Sequelae in the Post-Acute Phase by SARS-CoV-2 Infection and Comparison Groups

| Clinical Sequelae               | Category                            | 2020 Comparison Group   | 2019 Comparison Group   | Viral LRTI Comparison Group |
|---------------------------------|-------------------------------------|-------------------------|-------------------------|-----------------------------|
|                                 | <b>Matched Group Size</b>           | <b>87,337 vs 87,337</b> | <b>88,070 vs 88,070</b> | <b>73,490 vs 73,490</b>     |
|                                 | <b>Follow-up days: Median (IQR)</b> | <b>64 (23–150)</b>      | <b>62 (22–149)</b>      | <b>68 (23–155)</b>          |
| <b>Hypertension</b>             |                                     |                         |                         |                             |
| Hypertension                    | SARS-CoV-2 Group                    | 11.47                   | 13.16                   | 15.41                       |
|                                 | Comparison Group                    | 7.04                    | 7.1                     | 14.07                       |
|                                 | Risk Difference                     | 4.43 (2.27 to 6.37)     | 6.06 (3.09 to 9.23)     | 1.34 (-2.1 to 5.25)         |
|                                 | p-value                             | <0.001                  | <0.001                  | 1                           |
| <b>Pulmonary Hypertension</b>   |                                     |                         |                         |                             |
| Pulmonary Hypertension          | SARS-CoV-2 Group                    | 1.03                    | 1.03                    | 1.05                        |
|                                 | Comparison Group                    | 0.67                    | 0.88                    | 1.54                        |
|                                 | Risk Difference                     | 0.36 (0.18 to 0.55)     | 0.14 (-0.04 to 0.36)    | -0.49 (-0.71 to -0.25)      |
|                                 | p-value                             | <0.001                  | 0.9                     | 1                           |
| <b>Cardiology</b>               |                                     |                         |                         |                             |
| <b>Cardiac Rhythm Disorders</b> |                                     |                         |                         |                             |
| Cardiac Rhythm Disorders        | SARS-CoV-2 Group                    | 4.81                    | 4.8                     | 4.84                        |
|                                 | Comparison Group                    | 2.61                    | 3.17                    | 5.23                        |
|                                 | Risk Difference                     | 2.19 (1.76 to 2.57)     | 1.63 (1.19 to 2.06)     | -0.39 (-0.81 to 0.19)       |
|                                 | p-value                             | <0.001                  | <0.001                  | 1                           |
| <b>&gt; Cardiac Arrhythmia</b>  |                                     |                         |                         |                             |
| > Cardiac Arrhythmia            | SARS-CoV-2 Group                    | 2.82                    | 2.86                    | 2.85                        |
|                                 | Comparison Group                    | 1.76                    | 2.18                    | 3.18                        |
|                                 | Risk Difference                     | 1.06 (0.7 to 1.35)      | 0.68 (0.35 to 1.01)     | -0.32 (-0.64 to 0.1)        |
|                                 | p-value                             | <0.001                  | <0.001                  | 1                           |
| <b>&gt; Tachycardia</b>         |                                     |                         |                         |                             |
| > Tachycardia                   | SARS-CoV-2 Group                    | 2.89                    | 2.89                    | 2.9                         |
|                                 | Comparison Group                    | 1.35                    | 1.53                    | 2.92                        |
|                                 | Risk Difference                     | 1.54 (1.19 to 1.87)     | 1.36 (1.05 to 1.69)     | -0.02 (-0.44 to 0.35)       |
|                                 | p-value                             | <0.001                  | <0.001                  | 1                           |
| <b>&gt; POTs</b>                |                                     |                         |                         |                             |
| > POTs                          | SARS-CoV-2 Group                    | 1.14                    | 1.17                    | 1.14                        |
|                                 | Comparison Group                    | 0.65                    | 0.86                    | 1.29                        |
|                                 | Risk Difference                     | 0.49 (0.31 to 0.69)     | 0.31 (0.12 to 0.54)     | -0.15 (-0.38 to 0.08)       |
|                                 | p-value                             | <0.001                  | <0.001                  | 1                           |

|                                |                  |                     |                      |                        |
|--------------------------------|------------------|---------------------|----------------------|------------------------|
| CHF Cardiomyopathy Myocarditis | SARS-CoV-2 Group | 3.08                | 3.09                 | 3.22                   |
|                                | Comparison Group | 1.75                | 2.19                 | 5.6                    |
|                                | Risk Difference  | 1.33 (0.96 to 1.67) | 0.9 (0.55 to 1.27)   | -2.38 (-2.85 to -1.9)  |
|                                | p-value          | <0.001              | <0.001               | 1                      |
| > Congestive Heart Failure     | SARS-CoV-2 Group | 2.72                | 2.75                 | 2.86                   |
|                                | Comparison Group | 1.51                | 1.98                 | 4.99                   |
|                                | Risk Difference  | 1.21 (0.87 to 1.51) | 0.77 (0.45 to 1.07)  | -2.13 (-2.54 to -1.73) |
|                                | p-value          | <0.001              | <0.001               | 1                      |
| > Cardiomyopathy               | SARS-CoV-2 Group | 1.13                | 1.13                 | 1.13                   |
|                                | Comparison Group | 0.76                | 0.84                 | 1.72                   |
|                                | Risk Difference  | 0.37 (0.17 to 0.57) | 0.29 (0.07 to 0.51)  | -0.59 (-0.91 to -0.34) |
|                                | p-value          | <0.001              | <0.001               | 1                      |
| > Myocarditis                  | SARS-CoV-2 Group | 0.04                | 0.04                 | 0.03                   |
|                                | Comparison Group | 0.01                | 0.01                 | 0.01                   |
|                                | Risk Difference  | 0.03 (0 to 0.07)    | 0.03 (0 to 0.07)     | 0.02 (-0.01 to 0.06)   |
|                                | p-value          | 0.11                | 0.16                 | 1                      |
| Coronary Disease               | SARS-CoV-2 Group | 1.64                | 1.7                  | 1.59                   |
|                                | Comparison Group | 0.82                | 1.11                 | 2.12                   |
|                                | Risk Difference  | 0.82 (0.61 to 1.06) | 0.59 (0.35 to 0.84)  | -0.53 (-0.83 to -0.22) |
|                                | p-value          | <0.001              | <0.001               | 1                      |
| > Myocardial Infarction        | SARS-CoV-2 Group | 1.34                | 1.41                 | 1.31                   |
|                                | Comparison Group | 0.66                | 0.89                 | 1.77                   |
|                                | Risk Difference  | 0.69 (0.49 to 0.9)  | 0.52 (0.28 to 0.75)  | -0.45 (-0.76 to -0.18) |
|                                | p-value          | <0.001              | <0.001               | 1                      |
| > Acute Coronary Syndrome      | SARS-CoV-2 Group | 1.63                | 1.69                 | 1.57                   |
|                                | Comparison Group | 0.81                | 1.1                  | 2.11                   |
|                                | Risk Difference  | 0.81 (0.61 to 1.02) | 0.59 (0.28 to 0.83)  | -0.54 (-0.85 to -0.29) |
|                                | p-value          | <0.001              | <0.001               | 1                      |
| Cardiogenic Shock              | SARS-CoV-2 Group | 0.14                | 0.12                 | 0.14                   |
|                                | Comparison Group | 0.07                | 0.1                  | 0.22                   |
|                                | Risk Difference  | 0.06 (0 to 0.13)    | 0.02 (-0.05 to 0.08) | -0.08 (-0.18 to 0.01)  |
|                                | p-value          | 0.05                | 1                    | 1                      |

|                                      |                  |                     |                     |                        |
|--------------------------------------|------------------|---------------------|---------------------|------------------------|
| Hypercoagulability DVT<br>PE PAO     | SARS-CoV-2 Group | 3.45                | 3.48                | 3.43                   |
|                                      | Comparison Group | 1.2                 | 1.64                | 3.26                   |
|                                      | Risk Difference  | 2.25 (1.97 to 2.6)  | 1.85 (1.51 to 2.21) | 0.17 (-0.23 to 0.54)   |
|                                      | p-value          | <0.001              | <0.001              | 1                      |
| > Hypercoagulability                 | SARS-CoV-2 Group | 2.37                | 2.39                | 2.36                   |
|                                      | Comparison Group | 0.9                 | 1.25                | 2.33                   |
|                                      | Risk Difference  | 1.47 (1.2 to 1.73)  | 1.14 (0.87 to 1.44) | 0.03 (-0.29 to 0.38)   |
|                                      | p-value          | <0.001              | <0.001              | 1                      |
| > Deep Vein<br>Thrombosis            | SARS-CoV-2 Group | 1.66                | 1.68                | 1.64                   |
|                                      | Comparison Group | 0.5                 | 0.74                | 1.55                   |
|                                      | Risk Difference  | 1.16 (0.96 to 1.36) | 0.94 (0.74 to 1.14) | 0.1 (-0.16 to 0.38)    |
|                                      | p-value          | <0.001              | <0.001              | 1                      |
| > Pulmonary Embolism                 | SARS-CoV-2 Group | 1.26                | 1.28                | 1.22                   |
|                                      | Comparison Group | 0.27                | 0.34                | 1.08                   |
|                                      | Risk Difference  | 0.99 (0.82 to 1.16) | 0.94 (0.79 to 1.1)  | 0.14 (-0.05 to 0.34)   |
|                                      | p-value          | <0.001              | <0.001              | 0.69                   |
| > Peripheral Arterial<br>Occlusions  | SARS-CoV-2 Group | 0.4                 | 0.44                | 0.4                    |
|                                      | Comparison Group | 0.22                | 0.28                | 0.48                   |
|                                      | Risk Difference  | 0.18 (0.06 to 0.3)  | 0.16 (0.04 to 0.27) | -0.08 (-0.21 to 0.07)  |
|                                      | p-value          | <0.001              | <0.001              | 1                      |
| Stroke and Sequelae                  | SARS-CoV-2 Group | 2.21                | 2.29                | 2.3                    |
|                                      | Comparison Group | 1.28                | 1.7                 | 2.64                   |
|                                      | Risk Difference  | 0.92 (0.66 to 1.19) | 0.59 (0.3 to 0.89)  | -0.33 (-0.66 to -0.01) |
|                                      | p-value          | <0.001              | <0.001              | 1                      |
| > Ischemic Stroke and<br>Sequelae    | SARS-CoV-2 Group | 1.96                | 2.03                | 2.06                   |
|                                      | Comparison Group | 1.15                | 1.52                | 2.3                    |
|                                      | Risk Difference  | 0.81 (0.57 to 1.03) | 0.52 (0.26 to 0.79) | -0.24 (-0.54 to 0.09)  |
|                                      | p-value          | <0.001              | <0.001              | 1                      |
| > Hemorrhagic Stroke<br>and Sequelae | SARS-CoV-2 Group | 1.32                | 1.36                | 1.38                   |
|                                      | Comparison Group | 0.7                 | 0.96                | 1.6                    |

|                           |                  |                      |                      |                       |
|---------------------------|------------------|----------------------|----------------------|-----------------------|
|                           | Risk Difference  | 0.62 (0.44 to 0.84)  | 0.4 (0.2 to 0.6)     | -0.22 (-0.47 to 0.03) |
|                           | p-value          | <0.001               | <0.001               | 1                     |
| <b>Mental Health</b>      |                  |                      |                      |                       |
| Mental Health Diagnosis   | SARS-CoV-2 Group | 5.78                 | 5.78                 | 5.89                  |
|                           | Comparison Group | 3.28                 | 4.12                 | 5.94                  |
|                           | Risk Difference  | 2.5 (2.04 to 3.04)   | 1.66 (1.21 to 2.22)  | -0.06 (-0.63 to 0.51) |
|                           | p-value          | <0.001               | <0.001               | 1                     |
| Psychosis                 | SARS-CoV-2 Group | 0.31                 | 0.37                 | 0.35                  |
|                           | Comparison Group | 0.11                 | 0.22                 | 0.31                  |
|                           | Risk Difference  | 0.2 (0.11 to 0.28)   | 0.15 (0.02 to 0.27)  | 0.04 (-0.07 to 0.18)  |
|                           | p-value          | <0.001               | <0.001               | 1                     |
| <b>Neurologic</b>         |                  |                      |                      |                       |
| Amnesia/Memory Difficulty | SARS-CoV-2 Group | 4.92                 | 5.41                 | 5.53                  |
|                           | Comparison Group | 2.28                 | 3.46                 | 5.39                  |
|                           | Risk Difference  | 2.63 (2.23 to 3.13)  | 1.94 (1.45 to 2.37)  | 0.14 (-0.44 to 0.63)  |
|                           | p-value          | <0.001               | <0.001               | 1                     |
| Migraine                  | SARS-CoV-2 Group | 0.33                 | 0.32                 | 0.31                  |
|                           | Comparison Group | 0.27                 | 0.3                  | 0.34                  |
|                           | Risk Difference  | 0.06 (-0.05 to 0.16) | 0.02 (-0.1 to 0.16)  | -0.03 (-0.17 to 0.08) |
|                           | p-value          | 1                    | 1                    | 1                     |
| Peripheral Neuropathy     | SARS-CoV-2 Group | 0.99                 | 0.99                 | 0.93                  |
|                           | Comparison Group | 0.8                  | 1                    | 1.16                  |
|                           | Risk Difference  | 0.19 (-0.01 to 0.38) | -0.01 (-0.22 to 0.2) | -0.23 (-0.45 to 0.02) |
|                           | p-value          | 0.11                 | 1                    | 1                     |
| Encephalopathy            | SARS-CoV-2 Group | 2.76                 | 2.84                 | 2.77                  |
|                           | Comparison Group | 0.89                 | 1.3                  | 2.54                  |
|                           | Risk Difference  | 1.87 (1.58 to 2.17)  | 1.53 (1.28 to 1.83)  | 0.23 (-0.12 to 0.56)  |
|                           | p-value          | <0.001               | <0.001               | 1                     |
| Seizure                   | SARS-CoV-2 Group | 0.54                 | 0.56                 | 0.57                  |
|                           | Comparison Group | 0.26                 | 0.44                 | 0.58                  |
|                           | Risk Difference  | 0.28 (0.16 to 0.4)   | 0.12 (-0.02 to 0.27) | -0.02 (-0.17 to 0.15) |
|                           | p-value          | <0.001               | 0.37                 | 1                     |
| Dementia                  | SARS-CoV-2 Group | 2.5                  | 2.89                 | 2.97                  |

|                          |                  |                     |                      |                        |
|--------------------------|------------------|---------------------|----------------------|------------------------|
|                          | Comparison Group | 1.01                | 1.55                 | 2.26                   |
|                          | Risk Difference  | 1.49 (1.21 to 1.77) | 1.34 (0.98 to 1.67)  | 0.71 (0.3 to 1.08)     |
|                          | p-value          | <0.001              | <0.001               | <0.001                 |
| Guillain-Barre Syndrome  | SARS-CoV-2 Group | 0.02                | 0.02                 | 0.02                   |
|                          | Comparison Group | 0                   | 0                    | 0.02                   |
|                          | Risk Difference  | 0.02 (0 to 0.05)    | 0.02 (0 to 0.04)     | 0 (-0.03 to 0.02)      |
|                          | p-value          | <0.001              | 0.11                 | 1                      |
| <b>Diabetes</b>          |                  |                     |                      |                        |
| Type 2 Diabetes          | SARS-CoV-2 Group | 2.82                | 2.97                 | 3.05                   |
|                          | Comparison Group | 1.43                | 1.73                 | 2.51                   |
|                          | Risk Difference  | 1.39 (1 to 1.82)    | 1.24 (0.72 to 1.74)  | 0.55 (-0.04 to 1.08)   |
|                          | p-value          | <0.001              | <0.001               | 0.05                   |
| <b>Liver</b>             |                  |                     |                      |                        |
| Liver Test Abnormality   | SARS-CoV-2 Group | 1.82                | 1.85                 | 1.82                   |
|                          | Comparison Group | 1.27                | 1.46                 | 1.96                   |
|                          | Risk Difference  | 0.55 (0.29 to 0.8)  | 0.39 (0.09 to 0.64)  | -0.14 (-0.44 to 0.21)  |
|                          | p-value          | <0.001              | <0.001               | 1                      |
| <b>Nephrology</b>        |                  |                     |                      |                        |
| Kidney Injury            | SARS-CoV-2 Group | 6.24                | 6.64                 | 6.75                   |
|                          | Comparison Group | 3.65                | 4.78                 | 7.03                   |
|                          | Risk Difference  | 2.59 (2.03 to 3.12) | 1.86 (1.29 to 2.47)  | -0.28 (-0.98 to 0.39)  |
|                          | p-value          | <0.001              | <0.001               | 1                      |
| > Chronic Kidney Disease | SARS-CoV-2 Group | 4.07                | 4.38                 | 4.4                    |
|                          | Comparison Group | 3.13                | 4                    | 5.16                   |
|                          | Risk Difference  | 0.94 (0.48 to 1.38) | 0.38 (-0.14 to 0.98) | -0.76 (-1.29 to -0.15) |
|                          | p-value          | <0.001              | 0.58                 | 1                      |
| > Acute Kidney Injury    | SARS-CoV-2 Group | 4.49                | 4.59                 | 4.7                    |
|                          | Comparison Group | 1.76                | 2.49                 | 5.02                   |
|                          | Risk Difference  | 2.74 (2.39 to 3.07) | 2.1 (1.71 to 2.46)   | -0.32 (-0.81 to 0.07)  |
|                          | p-value          | <0.001              | <0.001               | 1                      |
| <b>Respiratory</b>       |                  |                     |                      |                        |
| Respiratory Failure      | SARS-CoV-2 Group | 8.96                | 9.15                 | 9.03                   |
|                          | Comparison Group | 1.41                | 2.03                 | 6.64                   |

|                                  |                  |                     |                       |                        |
|----------------------------------|------------------|---------------------|-----------------------|------------------------|
|                                  | Risk Difference  | 7.55 (7.18 to 8.01) | 7.12 (6.66 to 7.55)   | 2.39 (1.79 to 2.94)    |
|                                  | p-value          | <0.001              | <0.001                | <0.001                 |
| > Acute Respiratory Failure      | SARS-CoV-2 Group | 7.94                | 8.04                  | 8.04                   |
|                                  | Comparison Group | 1.01                | 1.5                   | 4.77                   |
|                                  | Risk Difference  | 6.93 (6.56 to 7.29) | 6.54 (6.18 to 6.88)   | 3.27 (2.76 to 3.75)    |
|                                  | p-value          | <0.001              | <0.001                | <0.001                 |
| > Chronic Respiratory Failure    | SARS-CoV-2 Group | 1.37                | 1.39                  | 1.41                   |
|                                  | Comparison Group | 0.29                | 0.46                  | 1.78                   |
|                                  | Risk Difference  | 1.08 (0.88 to 1.27) | 0.93 (0.77 to 1.13)   | -0.38 (-0.62 to -0.12) |
|                                  | p-value          | <0.001              | <0.001                | 1                      |
| > Interstitial Lung Disease      | SARS-CoV-2 Group | 1.29                | 1.39                  | 1.29                   |
|                                  | Comparison Group | 0.44                | 0.61                  | 1.74                   |
|                                  | Risk Difference  | 0.85 (0.67 to 1.03) | 0.79 (0.61 to 0.98)   | -0.45 (-0.78 to -0.23) |
|                                  | p-value          | <0.001              | <0.001                | 1                      |
| <b>Dermatologic</b>              |                  |                     |                       |                        |
| Atopic Dermatitis                | SARS-CoV-2 Group | 0.27                | 0.25                  | 0.28                   |
|                                  | Comparison Group | 0.26                | 0.3                   | 0.32                   |
|                                  | Risk Difference  | 0 (-0.12 to 0.12)   | -0.05 (-0.17 to 0.06) | -0.04 (-0.15 to 0.09)  |
|                                  | p-value          | 1                   | 1                     | 1                      |
| Urticaria                        | SARS-CoV-2 Group | 0.19                | 0.18                  | 0.21                   |
|                                  | Comparison Group | 0.11                | 0.19                  | 0.23                   |
|                                  | Risk Difference  | 0.08 (0 to 0.17)    | -0.01 (-0.09 to 0.07) | -0.02 (-0.14 to 0.08)  |
|                                  | p-value          | 0.05                | 1                     | 1                      |
| Herpesviral Vesicular Dermatitis | SARS-CoV-2 Group | 0.08                | 0.09                  | 0.1                    |
|                                  | Comparison Group | 0.03                | 0.07                  | 0.07                   |
|                                  | Risk Difference  | 0.05 (0.01 to 0.1)  | 0.02 (-0.04 to 0.09)  | 0.03 (-0.02 to 0.1)    |
|                                  | p-value          | <0.001              | 1                     | 1                      |
| <b>Others</b>                    |                  |                     |                       |                        |
| Sleep Apnea                      | SARS-CoV-2 Group | 1.52                | 1.52                  | 1.44                   |
|                                  | Comparison Group | 1.02                | 1.43                  | 2.13                   |
|                                  | Risk Difference  | 0.5 (0.22 to 0.74)  | 0.09 (-0.17 to 0.35)  | -0.69 (-0.99 to -0.33) |



|                      |                  |                     |                       |                        |
|----------------------|------------------|---------------------|-----------------------|------------------------|
|                      | p-value          | <0.001              | 1                     | 1                      |
| <b>Hematology</b>    |                  |                     |                       |                        |
| Thrombocytopenia     | SARS-CoV-2 Group | 0.92                | 0.95                  | 0.85                   |
|                      | Comparison Group | 0.6                 | 0.57                  | 1.03                   |
|                      | Risk Difference  | 0.32 (0.14 to 0.5)  | 0.38 (0.2 to 0.56)    | -0.18 (-0.39 to 0.03)  |
|                      | p-value          | <0.001              | <0.001                | 1                      |
| Leukopenia           | SARS-CoV-2 Group | 0.32                | 0.29                  | 0.3                    |
|                      | Comparison Group | 0.14                | 0.13                  | 0.24                   |
|                      | Risk Difference  | 0.17 (0.09 to 0.28) | 0.16 (0.08 to 0.26)   | 0.06 (-0.04 to 0.16)   |
|                      | p-value          | <0.001              | <0.001                | 1                      |
| Anemia               | SARS-CoV-2 Group | 3.27                | 3.3                   | 3.28                   |
|                      | Comparison Group | 1.95                | 2.19                  | 3.3                    |
|                      | Risk Difference  | 1.33 (0.97 to 1.68) | 1.11 (0.74 to 1.52)   | -0.02 (-0.43 to 0.39)  |
|                      | p-value          | <0.001              | <0.001                | 1                      |
| <b>Symptom</b>       |                  |                     |                       |                        |
| Myalgia              | SARS-CoV-2 Group | 8.06                | 8.11                  | 8.13                   |
|                      | Comparison Group | 5.81                | 6.99                  | 9.09                   |
|                      | Risk Difference  | 2.25 (1.57 to 2.95) | 1.12 (0.38 to 1.86)   | -0.95 (-1.71 to -0.19) |
|                      | p-value          | <0.001              | <0.001                | 1                      |
| Fatigue Diagnosis    | SARS-CoV-2 Group | 10.62               | 10.74                 | 10.84                  |
|                      | Comparison Group | 4.83                | 6.36                  | 10.86                  |
|                      | Risk Difference  | 5.8 (5.19 to 6.57)  | 4.39 (3.7 to 5.21)    | -0.03 (-0.85 to 0.89)  |
|                      | p-value          | <0.001              | <0.001                | 1                      |
| > Fatigue            | SARS-CoV-2 Group | 10.49               | 10.61                 | 10.7                   |
|                      | Comparison Group | 4.83                | 6.35                  | 10.84                  |
|                      | Risk Difference  | 5.66 (5.03 to 6.27) | 4.26 (3.54 to 4.9)    | -0.15 (-1.02 to 0.82)  |
|                      | p-value          | <0.001              | <0.001                | 1                      |
| > Chronic Fatigue    | SARS-CoV-2 Group | 0.37                | 0.37                  | 0.38                   |
|                      | Comparison Group | 0.27                | 0.42                  | 0.42                   |
|                      | Risk Difference  | 0.1 (-0.02 to 0.2)  | -0.05 (-0.16 to 0.08) | -0.04 (-0.2 to 0.1)    |
|                      | p-value          | 0.26                | 1                     | 1                      |
| > Post-viral Fatigue | SARS-CoV-2 Group | 0.24                | 0.25                  | 0.23                   |
|                      | Comparison Group | 0.01                | 0.02                  | 0.04                   |
|                      | Risk Difference  | 0.22 (0.16 to 0.29) | 0.22 (0.16 to 0.3)    | 0.18 (0.11 to 0.26)    |
|                      | p-value          | <0.001              | <0.001                | <0.001                 |

|         |                  |                      |                      |                      |
|---------|------------------|----------------------|----------------------|----------------------|
| Anosmia | SARS-CoV-2 Group | 0.07                 | 0.07                 | 0.06                 |
|         | Comparison Group | 0.03                 | 0.03                 | 0.04                 |
|         | Risk Difference  | 0.03 (-0.01 to 0.08) | 0.04 (-0.01 to 0.08) | 0.02 (-0.02 to 0.07) |
|         | p-value          | 0.74                 | 0.26                 | 1                    |

Cumulative incidence was obtained by Kaplan-Meier estimator at 120 days after the start of the post-acute phase (index date + 21 days), which is 141 days after index date.

Confidence intervals were calculated based on the Bonferroni correction, i.e.,  $(1 - 0.05/N)$  confidence interval.

Individuals were excluded if they had less than 21 days of observation from the index date, had already been diagnosed with the outcome of interest prior to acute phase, or their matched pair was excluded for the same reasons.

Table 4b: Incidence Rates and Hazard Ratio for Clinical Sequelae in the Post-Acute Phase by SARS-CoV-2 Infection and Comparison Groups

| Clinical Sequelae               | Category                            | 2020 Comparison Group   | 2019 Comparison Group   | Viral LRTI Comparison Group |
|---------------------------------|-------------------------------------|-------------------------|-------------------------|-----------------------------|
|                                 | <b>Matched Group Size</b>           | <b>87,337 vs 87,337</b> | <b>88,070 vs 88,070</b> | <b>73,490 vs 73,490</b>     |
|                                 | <b>Follow-up days: Median (IQR)</b> | <b>64 (23–150)</b>      | <b>62 (22–149)</b>      | <b>68 (23–155)</b>          |
| <b>Hypertension</b>             |                                     |                         |                         |                             |
| Hypertension                    | SARS-CoV-2 Group                    | 512/1496.24 (0.3422)    | 356/919.19 (0.3873)     | 402/886.01 (0.4537)         |
|                                 | Comparison Group                    | 347/1706.54 (0.2033)    | 213/992.2 (0.2147)      | 373/910.69 (0.4096)         |
|                                 | Hazard Ratio (CI)                   | 1.7 (1.36 to 2.14)      | 1.88 (1.41 to 2.5)      | 1.1 (0.87 to 1.39)          |
|                                 | p-value                             | <0.001                  | <0.001                  | 1                           |
| <b>Pulmonary Hypertension</b>   |                                     |                         |                         |                             |
| Pulmonary Hypertension          | SARS-CoV-2 Group                    | 577/19321.56 (0.0299)   | 594/19431.36 (0.0306)   | 521/17314.9 (0.0301)        |
|                                 | Comparison Group                    | 420/21440.24 (0.0196)   | 538/21106.98 (0.0255)   | 877/18591.78 (0.0472)       |
|                                 | Hazard Ratio (CI)                   | 1.5 (1.22 to 1.86)      | 1.19 (0.98 to 1.44)     | 0.62 (0.52 to 0.75)         |
|                                 | p-value                             | <0.001                  | 0.1                     | 1                           |
| <b>Cardiology</b>               |                                     |                         |                         |                             |
| <b>Cardiac Rhythm Disorders</b> |                                     |                         |                         |                             |
| Cardiac Rhythm Disorders        | SARS-CoV-2 Group                    | 2380/15954.22 (0.1492)  | 2378/15901.87 (0.1495)  | 2131/14448.12 (0.1475)      |
|                                 | Comparison Group                    | 1370/17721.64 (0.0773)  | 1671/17252.28 (0.0969)  | 2429/15325.02 (0.1585)      |
|                                 | Hazard Ratio (CI)                   | 1.92 (1.72 to 2.15)     | 1.54 (1.39 to 1.71)     | 0.92 (0.83 to 1.01)         |
|                                 | p-value                             | <0.001                  | <0.001                  | 1                           |
| <b>&gt; Cardiac Arrhythmia</b>  |                                     |                         |                         |                             |
| > Cardiac Arrhythmia            | SARS-CoV-2 Group                    | 1493/17373.85 (0.0859)  | 1521/17412.78 (0.0873)  | 1340/15689.08 (0.0854)      |
|                                 | Comparison Group                    | 1021/19281.45 (0.0530)  | 1251/18889.14 (0.0662)  | 1614/16754.37 (0.0963)      |
|                                 | Hazard Ratio (CI)                   | 1.61 (1.41 to 1.84)     | 1.31 (1.16 to 1.49)     | 0.87 (0.77 to 0.99)         |
|                                 | p-value                             | <0.001                  | <0.001                  | 1                           |
| <b>&gt; Tachycardia</b>         |                                     |                         |                         |                             |
| > Tachycardia                   | SARS-CoV-2 Group                    | 1633/18177.04 (0.0898)  | 1635/18209.86 (0.0898)  | 1429/16377.76 (0.0873)      |
|                                 | Comparison Group                    | 813/20229.32 (0.0402)   | 936/19820.75 (0.0472)   | 1497/17536.58 (0.0854)      |
|                                 | Hazard Ratio (CI)                   | 2.21 (1.92 to 2.54)     | 1.89 (1.65 to 2.16)     | 1 (0.89 to 1.13)            |
|                                 | p-value                             | <0.001                  | <0.001                  | 1                           |
| <b>&gt; POTs</b>                |                                     |                         |                         |                             |
| > POTs                          | SARS-CoV-2 Group                    | 686/19391.46 (0.0354)   | 697/19465.86 (0.0358)   | 602/17386.11 (0.0346)       |
|                                 | Comparison Group                    | 436/21560.1 (0.0202)    | 548/21227.65 (0.0258)   | 717/18755.67 (0.0382)       |
|                                 | Hazard Ratio (CI)                   | 1.73 (1.41 to 2.12)     | 1.38 (1.14 to 1.66)     | 0.89 (0.74 to 1.07)         |
|                                 | p-value                             | <0.001                  | <0.001                  | 1                           |

|                                |                   |                        |                        |                        |
|--------------------------------|-------------------|------------------------|------------------------|------------------------|
| CHF Cardiomyopathy Myocarditis | SARS-CoV-2 Group  | 1554/16258.01 (0.0956) | 1557/16162.34 (0.0963) | 1432/14618.44 (0.0980) |
|                                | Comparison Group  | 935/17995.61 (0.0520)  | 1138/17441.78 (0.0652) | 2612/15309.72 (0.1706) |
|                                | Hazard Ratio (CI) | 1.81 (1.58 to 2.08)    | 1.46 (1.28 to 1.66)    | 0.55 (0.5 to 0.62)     |
|                                | p-value           | <0.001                 | <0.001                 | 1                      |
| > Congestive Heart Failure     | SARS-CoV-2 Group  | 1450/17031.25 (0.0851) | 1456/16902.5 (0.0861)  | 1342/15269.62 (0.0879) |
|                                | Comparison Group  | 853/18873.87 (0.0452)  | 1097/18282.16 (0.0600) | 2453/16037.09 (0.1530) |
|                                | Hazard Ratio (CI) | 1.85 (1.61 to 2.13)    | 1.42 (1.24 to 1.62)    | 0.55 (0.49 to 0.62)    |
|                                | p-value           | <0.001                 | <0.001                 | 1                      |
| > Cardiomyopathy               | SARS-CoV-2 Group  | 624/18683.02 (0.0334)  | 617/18770.49 (0.0329)  | 559/16821.39 (0.0332)  |
|                                | Comparison Group  | 464/20666.19 (0.0225)  | 501/20381.55 (0.0246)  | 942/18016.64 (0.0523)  |
|                                | Hazard Ratio (CI) | 1.47 (1.2 to 1.79)     | 1.32 (1.09 to 1.61)    | 0.62 (0.52 to 0.73)    |
|                                | p-value           | <0.001                 | <0.001                 | 1                      |
| > Myocarditis                  | SARS-CoV-2 Group  | 25/20451.18 (0.0012)   | 27/20536.11 (0.0013)   | 17/18291.06 (0.0009)   |
|                                | Comparison Group  | 5/22697.18 (0.0002)    | 9/22405.85 (0.0004)    | 12/19802.42 (0.0006)   |
|                                | Hazard Ratio (CI) | 5.36 (1.06 to 27.03)   | 3.19 (0.9 to 11.32)    | 1.58 (0.45 to 5.57)    |
|                                | p-value           | 0.02                   | 0.06                   | 1                      |
| Coronary Disease               | SARS-CoV-2 Group  | 1014/19134.15 (0.0530) | 1049/19201.05 (0.0546) | 851/17172.38 (0.0496)  |
|                                | Comparison Group  | 532/21220.03 (0.0251)  | 720/20890.08 (0.0345)  | 1239/18415.78 (0.0673) |
|                                | Hazard Ratio (CI) | 2.08 (1.75 to 2.48)    | 1.57 (1.34 to 1.83)    | 0.72 (0.62 to 0.83)    |
|                                | p-value           | <0.001                 | <0.001                 | 1                      |
| > Myocardial Infarction        | SARS-CoV-2 Group  | 853/19474.26 (0.0438)  | 891/19563.16 (0.0455)  | 723/17471.01 (0.0414)  |
|                                | Comparison Group  | 425/21594.03 (0.0197)  | 578/21284.78 (0.0272)  | 1040/18770.43 (0.0554) |
|                                | Hazard Ratio (CI) | 2.18 (1.8 to 2.65)     | 1.65 (1.39 to 1.97)    | 0.72 (0.62 to 0.85)    |
|                                | p-value           | <0.001                 | <0.001                 | 1                      |
| > Acute Coronary Syndrome      | SARS-CoV-2 Group  | 1005/19140.97 (0.0525) | 1043/19205.98 (0.0543) | 841/17180.32 (0.049)   |
|                                | Comparison Group  | 528/21224.37 (0.0249)  | 714/20893.73 (0.0342)  | 1234/18421.19 (0.067)  |
|                                | Hazard Ratio (CI) | 2.08 (1.74 to 2.48)    | 1.57 (1.34 to 1.84)    | 0.71 (0.61 to 0.83)    |
|                                | p-value           | <0.001                 | <0.001                 | 1                      |
| Cardiogenic Shock              | SARS-CoV-2 Group  | 89/20391.16 (0.0044)   | 88/20482.64 (0.0043)   | 75/18243.14 (0.0041)   |
|                                | Comparison Group  | 51/22634.76 (0.0023)   | 69/22341.75 (0.0031)   | 138/19733.61 (0.0070)  |
|                                | Hazard Ratio (CI) | 1.9 (1.06 to 3.39)     | 1.37 (0.81 to 2.33)    | 0.57 (0.35 to 0.91)    |
|                                | p-value           | 0.007                  | 1                      | 1                      |

|                                      |                   |                        |                        |                        |
|--------------------------------------|-------------------|------------------------|------------------------|------------------------|
| Hypercoagulability DVT<br>PE PAO     | SARS-CoV-2 Group  | 2077/18141.41 (0.1145) | 2094/18049.31 (0.1160) | 1796/16242.88 (0.1106) |
|                                      | Comparison Group  | 708/20183.03 (0.0351)  | 952/19687.71 (0.0484)  | 1728/17310.2 (0.0998)  |
|                                      | Hazard Ratio (CI) | 3.19 (2.76 to 3.67)    | 2.36 (2.08 to 2.69)    | 1.08 (0.96 to 1.2)     |
|                                      | p-value           | <0.001                 | <0.001                 | 0.81                   |
| > Hypercoagulability                 | SARS-CoV-2 Group  | 1413/18678.28 (0.0756) | 1428/18627.56 (0.0767) | 1241/16729.79 (0.0742) |
|                                      | Comparison Group  | 538/20775.54 (0.0259)  | 759/20338.78 (0.0373)  | 1275/17922.64 (0.0711) |
|                                      | Hazard Ratio (CI) | 2.86 (2.42 to 3.37)    | 2.03 (1.75 to 2.35)    | 1.02 (0.89 to 1.16)    |
|                                      | p-value           | <0.001                 | <0.001                 | 1                      |
| > Deep Vein<br>Thrombosis            | SARS-CoV-2 Group  | 1029/19382.08 (0.0531) | 1039/19374.24 (0.0536) | 888/17318.41 (0.0513)  |
|                                      | Comparison Group  | 310/21542.3 (0.0144)   | 463/21159.16 (0.0219)  | 896/18632.26 (0.0481)  |
|                                      | Hazard Ratio (CI) | 3.59 (2.9 to 4.44)     | 2.4 (2 to 2.89)        | 1.03 (0.88 to 1.21)    |
|                                      | p-value           | <0.001                 | <0.001                 | 1                      |
| > Pulmonary Embolism                 | SARS-CoV-2 Group  | 882/19906.58 (0.0443)  | 902/19967.13 (0.0452)  | 745/17811.18 (0.0418)  |
|                                      | Comparison Group  | 182/22089.27 (0.0082)  | 215/21759.37 (0.0099)  | 643/19200.91 (0.0335)  |
|                                      | Hazard Ratio (CI) | 5.14 (3.93 to 6.71)    | 4.41 (3.44 to 5.66)    | 1.19 (0.99 to 1.42)    |
|                                      | p-value           | <0.001                 | <0.001                 | 0.04                   |
| > Peripheral Arterial<br>Occlusions  | SARS-CoV-2 Group  | 255/20110.56 (0.0127)  | 275/20161.43 (0.0136)  | 221/17979.03 (0.0123)  |
|                                      | Comparison Group  | 148/22320.59 (0.0066)  | 181/21999.07 (0.0082)  | 269/19409.56 (0.0139)  |
|                                      | Hazard Ratio (CI) | 1.88 (1.34 to 2.64)    | 1.64 (1.19 to 2.25)    | 0.87 (0.64 to 1.17)    |
|                                      | p-value           | <0.001                 | <0.001                 | 1                      |
| Stroke and Sequelae                  | SARS-CoV-2 Group  | 1318/17972.2 (0.0733)  | 1328/17602.23 (0.0754) | 1176/15898.62 (0.0740) |
|                                      | Comparison Group  | 744/19974.35 (0.0372)  | 979/19239.95 (0.0509)  | 1443/17105.47 (0.0844) |
|                                      | Hazard Ratio (CI) | 1.92 (1.66 to 2.24)    | 1.46 (1.27 to 1.68)    | 0.85 (0.75 to 0.97)    |
|                                      | p-value           | <0.001                 | <0.001                 | 1                      |
| > Ischemic Stroke and<br>Sequelae    | SARS-CoV-2 Group  | 1189/18146.25 (0.0655) | 1198/17810.78 (0.0673) | 1067/16068.55 (0.0664) |
|                                      | Comparison Group  | 674/20179.02 (0.0334)  | 876/19471.46 (0.0450)  | 1270/17301.62 (0.0734) |
|                                      | Hazard Ratio (CI) | 1.92 (1.64 to 2.25)    | 1.47 (1.27 to 1.7)     | 0.88 (0.77 to 1.01)    |
|                                      | p-value           | <0.001                 | <0.001                 | 1                      |
| > Hemorrhagic Stroke<br>and Sequelae | SARS-CoV-2 Group  | 836/19009.58 (0.044)   | 851/18777.63 (0.0453)  | 756/16903.41 (0.0447)  |
|                                      | Comparison Group  | 443/21125.82 (0.021)   | 615/20525.44 (0.0300)  | 934/18250.9 (0.0512)   |

|                           |                   |                        |                        |                        |
|---------------------------|-------------------|------------------------|------------------------|------------------------|
|                           | Hazard Ratio (CI) | 2.04 (1.68 to 2.47)    | 1.48 (1.24 to 1.76)    | 0.85 (0.72 to 1)       |
|                           | p-value           | <0.001                 | <0.001                 | 1                      |
| <b>Mental Health</b>      |                   |                        |                        |                        |
| Mental Health Diagnosis   | SARS-CoV-2 Group  | 2319/13114.98 (0.1768) | 2188/12296.92 (0.1779) | 2015/11387.88 (0.1769) |
|                           | Comparison Group  | 1469/14630.55 (0.1004) | 1630/13397.87 (0.1217) | 2086/12158.7 (0.1716)  |
|                           | Hazard Ratio (CI) | 1.76 (1.58 to 1.97)    | 1.46 (1.31 to 1.63)    | 1.01 (0.91 to 1.12)    |
|                           | p-value           | <0.001                 | <0.001                 | 1                      |
| Psychosis                 | SARS-CoV-2 Group  | 206/20127.49 (0.0102)  | 240/20090.12 (0.0119)  | 202/17978.1 (0.0112)   |
|                           | Comparison Group  | 82/22358.86 (0.0037)   | 146/21916.95 (0.0067)  | 173/19453.05 (0.0089)  |
|                           | Hazard Ratio (CI) | 2.74 (1.78 to 4.22)    | 1.77 (1.25 to 2.5)     | 1.24 (0.88 to 1.75)    |
|                           | p-value           | <0.001                 | <0.001                 | 1                      |
| <b>Neurologic</b>         |                   |                        |                        |                        |
| Amnesia/Memory Difficulty | SARS-CoV-2 Group  | 2538/16342.15 (0.1553) | 2578/15008.48 (0.1718) | 2410/14048.53 (0.1715) |
|                           | Comparison Group  | 1243/18224.08 (0.0682) | 1754/16295.79 (0.1076) | 2438/15023.94 (0.1623) |
|                           | Hazard Ratio (CI) | 2.26 (2.02 to 2.53)    | 1.59 (1.43 to 1.76)    | 1.03 (0.94 to 1.14)    |
|                           | p-value           | <0.001                 | <0.001                 | 1                      |
| Migraine                  | SARS-CoV-2 Group  | 198/19916.2 (0.0099)   | 193/19979.72 (0.0097)  | 170/17829.44 (0.0095)  |
|                           | Comparison Group  | 180/22078.72 (0.0082)  | 201/21782.62 (0.0092)  | 213/19266.3 (0.0111)   |
|                           | Hazard Ratio (CI) | 1.21 (0.86 to 1.71)    | 1.04 (0.75 to 1.45)    | 0.86 (0.61 to 1.21)    |
|                           | p-value           | 1                      | 1                      | 1                      |
| Peripheral Neuropathy     | SARS-CoV-2 Group  | 571/19099.24 (0.0299)  | 569/19082.88 (0.0298)  | 484/17070.33 (0.0284)  |
|                           | Comparison Group  | 498/21185.52 (0.0235)  | 612/20796.75 (0.0294)  | 650/18362.93 (0.0354)  |
|                           | Hazard Ratio (CI) | 1.26 (1.03 to 1.55)    | 1.01 (0.83 to 1.22)    | 0.79 (0.65 to 0.96)    |
|                           | p-value           | 0.004                  | 1                      | 1                      |
| Encephalopathy            | SARS-CoV-2 Group  | 1766/19109.67 (0.0924) | 1803/18840.72 (0.0957) | 1542/16987.23 (0.0908) |
|                           | Comparison Group  | 569/21228.42 (0.0268)  | 847/20520.7 (0.0413)   | 1411/18263.94 (0.0773) |
|                           | Hazard Ratio (CI) | 3.36 (2.87 to 3.93)    | 2.28 (1.99 to 2.61)    | 1.14 (1.01 to 1.29)    |
|                           | p-value           | <0.001                 | <0.001                 | 0.008                  |
| Seizure                   | SARS-CoV-2 Group  | 334/19742.58 (0.0169)  | 349/19723.05 (0.0177)  | 311/17632.61 (0.0176)  |
|                           | Comparison Group  | 168/21924.95 (0.0077)  | 280/21524.97 (0.0130)  | 344/19083.15 (0.0180)  |
|                           | Hazard Ratio (CI) | 2.17 (1.59 to 2.97)    | 1.35 (1.04 to 1.76)    | 0.95 (0.74 to 1.24)    |
|                           | p-value           | <0.001                 | 0.005                  | 1                      |
| Dementia                  | SARS-CoV-2 Group  | 1290/16834.55 (0.0766) | 1315/14705.27 (0.0894) | 1266/14164.28 (0.0894) |

|                          |                   |                        |                        |                        |
|--------------------------|-------------------|------------------------|------------------------|------------------------|
|                          | Comparison Group  | 623/18785.25 (0.0332)  | 755/16007.51 (0.0472)  | 1053/15308.37 (0.0688) |
|                          | Hazard Ratio (CI) | 2.27 (1.93 to 2.66)    | 1.87 (1.61 to 2.18)    | 1.26 (1.1 to 1.45)     |
|                          | p-value           | <0.001                 | <0.001                 | <0.001                 |
| Guillain-Barre Syndrome  | SARS-CoV-2 Group  | 15/20444.92 (0.0007)   | 15/20527.07 (0.0007)   | 9/18284.48 (0.0005)    |
|                          | Comparison Group  | 3/22691.62 (0.0001)    | 3/22396.38 (0.0001)    | 10/19792.42 (0.0005)   |
|                          | Hazard Ratio (CI) | 5.31 (0.67 to 42.37)   | 5.23 (0.64 to 42.64)   | 0.92 (0.2 to 4.21)     |
|                          | p-value           | 0.21                   | 0.24                   | 1                      |
| <b>Diabetes</b>          |                   |                        |                        |                        |
| Type 2 Diabetes          | SARS-CoV-2 Group  | 728/8569.02 (0.0850)   | 704/7599.69 (0.0926)   | 695/7323.44 (0.0949)   |
|                          | Comparison Group  | 415/9683.7 (0.0429)    | 450/8421.53 (0.0534)   | 591/7794.21 (0.0758)   |
|                          | Hazard Ratio (CI) | 1.96 (1.6 to 2.4)      | 1.72 (1.41 to 2.1)     | 1.23 (1.02 to 1.48)    |
|                          | p-value           | <0.001                 | <0.001                 | 0.005                  |
| <b>Liver</b>             |                   |                        |                        |                        |
| Liver Test Abnormality   | SARS-CoV-2 Group  | 1005/18332.09 (0.0548) | 1019/18324.53 (0.0556) | 881/16510.34 (0.0534)  |
|                          | Comparison Group  | 755/20396.72 (0.0370)  | 875/20015.15 (0.0437)  | 1067/17801.14 (0.0599) |
|                          | Hazard Ratio (CI) | 1.47 (1.25 to 1.72)    | 1.26 (1.08 to 1.47)    | 0.88 (0.76 to 1.02)    |
|                          | p-value           | <0.001                 | <0.001                 | 1                      |
| <b>Nephrology</b>        |                   |                        |                        |                        |
| Kidney Injury            | SARS-CoV-2 Group  | 2509/12181.34 (0.2060) | 2541/11569.58 (0.2196) | 2322/10850.95 (0.2140) |
|                          | Comparison Group  | 1487/13505.21 (0.1101) | 1753/12339.32 (0.1421) | 2363/11063.82 (0.2136) |
|                          | Hazard Ratio (CI) | 1.85 (1.66 to 2.06)    | 1.54 (1.39 to 1.71)    | 0.99 (0.9 to 1.09)     |
|                          | p-value           | <0.001                 | <0.001                 | 1                      |
| > Chronic Kidney Disease | SARS-CoV-2 Group  | 1628/12809.25 (0.1271) | 1663/12298.47 (0.1352) | 1525/11508.12 (0.1325) |
|                          | Comparison Group  | 1305/14180.41 (0.0920) | 1545/13142.37 (0.1176) | 1824/11846.24 (0.1540) |
|                          | Hazard Ratio (CI) | 1.36 (1.21 to 1.54)    | 1.14 (1.02 to 1.28)    | 0.84 (0.75 to 0.95)    |
|                          | p-value           | <0.001                 | 0.004                  | 1                      |
| > Acute Kidney Injury    | SARS-CoV-2 Group  | 2807/17697.95 (0.1586) | 2868/17517.41 (0.1637) | 2522/15811.42 (0.1595) |
|                          | Comparison Group  | 1055/19684.35 (0.0536) | 1419/18962.33 (0.0748) | 2568/16715.62 (0.1536) |
|                          | Hazard Ratio (CI) | 2.89 (2.57 to 3.25)    | 2.16 (1.94 to 2.4)     | 1.02 (0.93 to 1.11)    |
|                          | p-value           | <0.001                 | <0.001                 | 1                      |
| <b>Respiratory</b>       |                   |                        |                        |                        |
| Respiratory Failure      | SARS-CoV-2 Group  | 5917/17945.69 (0.3297) | 5997/17834.79 (0.3363) | 5054/15881.47 (0.3182) |
|                          | Comparison Group  | 849/19898.64 (0.0427)  | 1228/19365.8 (0.0634)  | 3456/16753.5 (0.2063)  |

|                                  |                   |                        |                       |                        |
|----------------------------------|-------------------|------------------------|-----------------------|------------------------|
|                                  | Hazard Ratio (CI) | 7.55 (6.7 to 8.51)     | 5.27 (4.76 to 5.83)   | 1.53 (1.42 to 1.64)    |
|                                  | p-value           | <0.001                 | <0.001                | <0.001                 |
| > Acute Respiratory Failure      | SARS-CoV-2 Group  | 5676/18936.03 (0.2997) | 5760/18908 (0.3046)   | 4880/16901.73 (0.2887) |
|                                  | Comparison Group  | 647/21014.51 (0.0308)  | 956/20579.4 (0.0465)  | 2708/18013.61 (0.1503) |
|                                  | Hazard Ratio (CI) | 9.4 (8.21 to 10.77)    | 6.45 (5.75 to 7.22)   | 1.9 (1.75 to 2.05)     |
|                                  | p-value           | <0.001                 | <0.001                | <0.001                 |
| > Chronic Respiratory Failure    | SARS-CoV-2 Group  | 844/19752.53 (0.0427)  | 855/19813.77 (0.0432) | 758/17607.11 (0.0431)  |
|                                  | Comparison Group  | 201/21901.35 (0.0092)  | 288/21557.88 (0.0134) | 968/18889.4 (0.0512)   |
|                                  | Hazard Ratio (CI) | 4.53 (3.5 to 5.87)     | 3.17 (2.53 to 3.96)   | 0.82 (0.69 to 0.96)    |
|                                  | p-value           | <0.001                 | <0.001                | 1                      |
| > Interstitial Lung Disease      | SARS-CoV-2 Group  | 776/19590.21 (0.0396)  | 817/19639.86 (0.0416) | 685/17458.74 (0.0392)  |
|                                  | Comparison Group  | 276/21727.79 (0.0127)  | 410/21402.35 (0.0192) | 954/18779.13 (0.0508)  |
|                                  | Hazard Ratio (CI) | 3.07 (2.43 to 3.86)    | 2.15 (1.76 to 2.63)   | 0.75 (0.64 to 0.89)    |
|                                  | p-value           | <0.001                 | <0.001                | 1                      |
| <b>Dermatologic</b>              |                   |                        |                       |                        |
| Atopic Dermatitis                | SARS-CoV-2 Group  | 161/20054.1 (0.0080)   | 158/20144.34 (0.0078) | 152/17948.95 (0.0085)  |
|                                  | Comparison Group  | 184/22272.08 (0.0083)  | 195/21982.88 (0.0089) | 185/19418.73 (0.0095)  |
|                                  | Hazard Ratio (CI) | 0.97 (0.68 to 1.38)    | 0.88 (0.62 to 1.26)   | 0.88 (0.61 to 1.26)    |
|                                  | p-value           | 1                      | 1                     | 1                      |
| Urticaria                        | SARS-CoV-2 Group  | 119/20206.41 (0.0059)  | 111/20289.79 (0.0055) | 113/18059.84 (0.0063)  |
|                                  | Comparison Group  | 76/22438.32 (0.0034)   | 132/22140.13 (0.0060) | 140/19562.39 (0.0072)  |
|                                  | Hazard Ratio (CI) | 1.73 (1.06 to 2.81)    | 0.91 (0.59 to 1.4)    | 0.87 (0.57 to 1.32)    |
|                                  | p-value           | 0.006                  | 1                     | 1                      |
| Herpesviral Vesicular Dermatitis | SARS-CoV-2 Group  | 46/20379.13 (0.0023)   | 49/20459.65 (0.0024)  | 48/18220.66 (0.0026)   |
|                                  | Comparison Group  | 26/22617.21 (0.0011)   | 46/22320.38 (0.0021)  | 41/19731.31 (0.0021)   |
|                                  | Hazard Ratio (CI) | 1.94 (0.87 to 4.35)    | 1.16 (0.59 to 2.27)   | 1.25 (0.62 to 2.5)     |
|                                  | p-value           | 0.17                   | 1                     | 1                      |
| <b>Others</b>                    |                   |                        |                       |                        |
| Sleep Apnea                      | SARS-CoV-2 Group  | 749/16816.92 (0.0445)  | 755/16830.42 (0.0449) | 644/15215.91 (0.0423)  |
|                                  | Comparison Group  | 541/18503.12 (0.0292)  | 749/18230.44 (0.0411) | 1051/16227.64 (0.0648) |
|                                  | Hazard Ratio (CI) | 1.5 (1.25 to 1.81)     | 1.08 (0.91 to 1.28)   | 0.64 (0.54 to 0.75)    |



|                      |                   |                        |                        |                        |
|----------------------|-------------------|------------------------|------------------------|------------------------|
|                      | p-value           | <0.001                 | 1                      | 1                      |
| <b>Hematology</b>    |                   |                        |                        |                        |
| Thrombocytopenia     | SARS-CoV-2 Group  | 591/19549.66 (0.0302)  | 600/19618.55 (0.0306)  | 479/17508.41 (0.0274)  |
|                      | Comparison Group  | 367/21710.18 (0.0169)  | 353/21374.12 (0.0165)  | 583/18889.97 (0.0309)  |
|                      | Hazard Ratio (CI) | 1.75 (1.41 to 2.18)    | 1.82 (1.46 to 2.27)    | 0.86 (0.71 to 1.06)    |
|                      | p-value           | <0.001                 | <0.001                 | 1                      |
| Leukopenia           | SARS-CoV-2 Group  | 203/20220.2 (0.0100)   | 192/20296.89 (0.0095)  | 166/18074.44 (0.0092)  |
|                      | Comparison Group  | 101/22431.99 (0.0045)  | 96/22136.37 (0.0043)   | 155/19565.48 (0.0079)  |
|                      | Hazard Ratio (CI) | 2.19 (1.47 to 3.28)    | 2.15 (1.42 to 3.24)    | 1.15 (0.79 to 1.67)    |
|                      | p-value           | <0.001                 | <0.001                 | 1                      |
| Anemia               | SARS-CoV-2 Group  | 1652/16932.12 (0.0976) | 1659/16780.08 (0.0989) | 1490/15169.48 (0.0982) |
|                      | Comparison Group  | 1095/18907.59 (0.0579) | 1207/18336.4 (0.0658)  | 1598/16229.73 (0.0985) |
|                      | Hazard Ratio (CI) | 1.67 (1.47 to 1.9)     | 1.49 (1.32 to 1.69)    | 0.98 (0.87 to 1.11)    |
|                      | p-value           | <0.001                 | <0.001                 | 1                      |
| <b>Symptom</b>       |                   |                        |                        |                        |
| Myalgia              | SARS-CoV-2 Group  | 2911/12051.42 (0.2415) | 2743/11165.02 (0.2457) | 2407/10026.35 (0.2401) |
|                      | Comparison Group  | 2352/13479.15 (0.1745) | 2539/12120.13 (0.2095) | 2838/10584.02 (0.2681) |
|                      | Hazard Ratio (CI) | 1.39 (1.27 to 1.52)    | 1.17 (1.07 to 1.28)    | 0.88 (0.8 to 0.96)     |
|                      | p-value           | <0.001                 | <0.001                 | 1                      |
| Fatigue Diagnosis    | SARS-CoV-2 Group  | 4386/13042.3 (0.3363)  | 4144/11999.75 (0.3453) | 3638/10810.39 (0.3365) |
|                      | Comparison Group  | 2114/14571.52 (0.1451) | 2518/13088.68 (0.1924) | 3703/11390.83 (0.3251) |
|                      | Hazard Ratio (CI) | 2.35 (2.16 to 2.56)    | 1.82 (1.68 to 1.98)    | 1.02 (0.94 to 1.1)     |
|                      | p-value           | <0.001                 | <0.001                 | 1                      |
| > Fatigue            | SARS-CoV-2 Group  | 4334/13054.03 (0.332)  | 4100/12012.6 (0.3413)  | 3597/10824.22 (0.3323) |
|                      | Comparison Group  | 2115/14585.12 (0.145)  | 2518/13102.79 (0.1922) | 3699/11408.48 (0.3242) |
|                      | Hazard Ratio (CI) | 2.32 (2.13 to 2.53)    | 1.8 (1.66 to 1.95)     | 1.01 (0.93 to 1.09)    |
|                      | p-value           | <0.001                 | <0.001                 | 1                      |
| > Chronic Fatigue    | SARS-CoV-2 Group  | 235/20020.05 (0.0117)  | 235/20029.17 (0.0117)  | 207/17855.78 (0.0116)  |
|                      | Comparison Group  | 170/22226.87 (0.0076)  | 264/21858.93 (0.0121)  | 244/19322.21 (0.0126)  |
|                      | Hazard Ratio (CI) | 1.52 (1.09 to 2.12)    | 0.96 (0.72 to 1.3)     | 0.9 (0.66 to 1.23)     |
|                      | p-value           | <0.001                 | 1                      | 1                      |
| > Post-viral Fatigue | SARS-CoV-2 Group  | 151/20418.41 (0.0074)  | 153/20496.78 (0.0075)  | 128/18258.85 (0.0070)  |
|                      | Comparison Group  | 8/22663.59 (0.0004)    | 14/22362.27 (0.0006)   | 33/19761.26 (0.0017)   |
|                      | Hazard Ratio (CI) | 20.03 (6.04 to 66.4)   | 11.52 (4.58 to 29)     | 4.07 (2.14 to 7.73)    |
|                      | p-value           | <0.001                 | <0.001                 | <0.001                 |

|         |                   |                     |                      |                      |
|---------|-------------------|---------------------|----------------------|----------------------|
| Anosmia | SARS-CoV-2 Group  | 41/20428.55 (0.002) | 48/20510.01 (0.0023) | 37/18267.84 (0.0020) |
|         | Comparison Group  | 23/22673.24 (0.001) | 14/22375.2 (0.0006)  | 29/19775.72 (0.0015) |
|         | Hazard Ratio (CI) | 1.97 (0.83 to 4.68) | 3.75 (1.37 to 10.25) | 1.41 (0.62 to 3.21)  |
|         | p-value           | 0.25                | <0.001               | 1                    |

Denominator for incidence of each outcome is person-year for individuals at-risk starting at the start of the post-acute phase (index date + 21 days).

Confidence intervals were calculated based on the Bonferroni correction, i.e., (1 - 0.05/N) confidence interval.

Individuals were excluded if they had less than 21 days of observation from the index date, had already been diagnosed with the outcome of interest prior to acute phase, or their matched pair was excluded for the same reasons.

Table 4c: Cumulative Incidence and Risk Difference per 100 Individuals for Clinical Sequelae in the Post-Acute Phase by SARS-CoV-2 Infection and 2019 Comparison Group Before and After Exactly Matching Prior Dementia Comorbidity

| Clinical Sequelae               | Category                                               | 2019 Comparison         | 2019 Comparison with Balanced Dementia |
|---------------------------------|--------------------------------------------------------|-------------------------|----------------------------------------|
|                                 | <b>Matched Group Size</b>                              | <b>88,070 vs 88,070</b> | <b>63,945 vs 63,945</b>                |
|                                 | <b>Outcome Observation Period (Days): Median (IQR)</b> | <b>62 (22 - 149)</b>    | <b>63 (22 - 150)</b>                   |
| <b>Hypertension</b>             |                                                        |                         |                                        |
| Hypertension                    | SARS-CoV-2 Group                                       | 13.16                   | 12.55                                  |
|                                 | 2019 Comparison Group                                  | 7.1                     | 6.79                                   |
|                                 | Risk Difference                                        | 6.06 (3.09 to 9.23)     | 5.76 (2.64 to 8.77)                    |
|                                 | p-value                                                | <0.001                  | <0.001                                 |
| <b>Pulmonary Hypertension</b>   |                                                        |                         |                                        |
| Pulmonary Hypertension          | SARS-CoV-2 Group                                       | 1.03                    | 1.03                                   |
|                                 | 2019 Comparison Group                                  | 0.88                    | 0.88                                   |
|                                 | Risk Difference                                        | 0.14 (-0.04 to 0.36)    | 0.15 (-0.05 to 0.39)                   |
|                                 | p-value                                                | 0.9                     | 0.8                                    |
| <b>Cardiology</b>               |                                                        |                         |                                        |
| <b>Cardiac Rhythm Disorders</b> |                                                        |                         |                                        |
| Cardiac Rhythm Disorders        | SARS-CoV-2 Group                                       | 4.8                     | 4.6                                    |
|                                 | 2019 Comparison Group                                  | 3.17                    | 2.96                                   |
|                                 | Risk Difference                                        | 1.63 (1.19 to 2.06)     | 1.64 (1.03 to 2.17)                    |
|                                 | p-value                                                | <0.001                  | <0.001                                 |
| <b>&gt; Cardiac Arrhythmia</b>  |                                                        |                         |                                        |
| > Cardiac Arrhythmia            | SARS-CoV-2 Group                                       | 2.86                    | 2.81                                   |
|                                 | 2019 Comparison Group                                  | 2.18                    | 2.05                                   |
|                                 | Risk Difference                                        | 0.68 (0.35 to 1.01)     | 0.76 (0.39 to 1.21)                    |
|                                 | p-value                                                | <0.001                  | <0.001                                 |
| <b>&gt; Tachycardia</b>         |                                                        |                         |                                        |
| > Tachycardia                   | SARS-CoV-2 Group                                       | 2.89                    | 2.77                                   |
|                                 | 2019 Comparison Group                                  | 1.53                    | 1.42                                   |
|                                 | Risk Difference                                        | 1.36 (1.05 to 1.69)     | 1.35 (0.97 to 1.66)                    |
|                                 | p-value                                                | <0.001                  | <0.001                                 |
| <b>&gt; POTs</b>                |                                                        |                         |                                        |
| > POTs                          | SARS-CoV-2 Group                                       | 1.17                    | 1.12                                   |
|                                 | 2019 Comparison Group                                  | 0.86                    | 0.79                                   |
|                                 | Risk Difference                                        | 0.31 (0.12 to 0.54)     | 0.33 (0.12 to 0.57)                    |
|                                 | p-value                                                | <0.001                  | <0.001                                 |

|                                |                       |                      |                      |
|--------------------------------|-----------------------|----------------------|----------------------|
| CHF Cardiomyopathy Myocarditis | SARS-CoV-2 Group      | 3.09                 | 3.1                  |
|                                | 2019 Comparison Group | 2.19                 | 2.05                 |
|                                | Risk Difference       | 0.9 (0.55 to 1.27)   | 1.04 (0.61 to 1.46)  |
|                                | p-value               | <0.001               | <0.001               |
| > Congestive Heart Failure     | SARS-CoV-2 Group      | 2.75                 | 2.71                 |
|                                | 2019 Comparison Group | 1.98                 | 1.84                 |
|                                | Risk Difference       | 0.77 (0.45 to 1.07)  | 0.87 (0.58 to 1.27)  |
|                                | p-value               | <0.001               | <0.001               |
| > Cardiomyopathy               | SARS-CoV-2 Group      | 1.13                 | 1.14                 |
|                                | 2019 Comparison Group | 0.84                 | 0.85                 |
|                                | Risk Difference       | 0.29 (0.07 to 0.51)  | 0.28 (0 to 0.52)     |
|                                | p-value               | <0.001               | 0.05                 |
| > Myocarditis                  | SARS-CoV-2 Group      | 0.04                 | 0.05                 |
|                                | 2019 Comparison Group | 0.01                 | 0.02                 |
|                                | Risk Difference       | 0.03 (0 to 0.07)     | 0.03 (-0.01 to 0.09) |
|                                | p-value               | 0.16                 | 0.64                 |
| Coronary Disease               | SARS-CoV-2 Group      | 1.7                  | 1.68                 |
|                                | 2019 Comparison Group | 1.11                 | 1.06                 |
|                                | Risk Difference       | 0.59 (0.35 to 0.84)  | 0.62 (0.33 to 0.93)  |
|                                | p-value               | <0.001               | <0.001               |
| > Myocardial Infarction        | SARS-CoV-2 Group      | 1.41                 | 1.39                 |
|                                | 2019 Comparison Group | 0.89                 | 0.83                 |
|                                | Risk Difference       | 0.52 (0.28 to 0.75)  | 0.56 (0.35 to 0.81)  |
|                                | p-value               | <0.001               | <0.001               |
| > Acute Coronary Syndrome      | SARS-CoV-2 Group      | 1.69                 | 1.67                 |
|                                | 2019 Comparison Group | 1.1                  | 1.06                 |
|                                | Risk Difference       | 0.59 (0.28 to 0.83)  | 0.61 (0.31 to 0.85)  |
|                                | p-value               | <0.001               | <0.001               |
| Cardiogenic Shock              | SARS-CoV-2 Group      | 0.12                 | 0.13                 |
|                                | 2019 Comparison Group | 0.1                  | 0.09                 |
|                                | Risk Difference       | 0.02 (-0.05 to 0.08) | 0.04 (-0.04 to 0.12) |
|                                | p-value               | 1                    | 1                    |
| Hypercoagulability DVT PE PAO  | SARS-CoV-2 Group      | 3.48                 | 3.41                 |

|                                   |                       |                     |                     |
|-----------------------------------|-----------------------|---------------------|---------------------|
|                                   | 2019 Comparison Group | 1.64                | 1.57                |
|                                   | Risk Difference       | 1.85 (1.51 to 2.21) | 1.84 (1.55 to 2.21) |
|                                   | p-value               | <0.001              | <0.001              |
| > Hypercoagulability              | SARS-CoV-2 Group      | 2.39                | 2.29                |
|                                   | 2019 Comparison Group | 1.25                | 1.19                |
|                                   | Risk Difference       | 1.14 (0.87 to 1.44) | 1.1 (0.82 to 1.45)  |
|                                   | p-value               | <0.001              | <0.001              |
| > Deep Vein Thrombosis            | SARS-CoV-2 Group      | 1.68                | 1.57                |
|                                   | 2019 Comparison Group | 0.74                | 0.68                |
|                                   | Risk Difference       | 0.94 (0.74 to 1.14) | 0.89 (0.66 to 1.14) |
|                                   | p-value               | <0.001              | <0.001              |
| > Pulmonary Embolism              | SARS-CoV-2 Group      | 1.28                | 1.25                |
|                                   | 2019 Comparison Group | 0.34                | 0.31                |
|                                   | Risk Difference       | 0.94 (0.79 to 1.1)  | 0.94 (0.76 to 1.12) |
|                                   | p-value               | <0.001              | <0.001              |
| > Peripheral Arterial Occlusions  | SARS-CoV-2 Group      | 0.44                | 0.45                |
|                                   | 2019 Comparison Group | 0.28                | 0.27                |
|                                   | Risk Difference       | 0.16 (0.04 to 0.27) | 0.18 (0.05 to 0.31) |
|                                   | p-value               | <0.001              | <0.001              |
| Stroke and Sequelae               | SARS-CoV-2 Group      | 2.29                | 2.09                |
|                                   | 2019 Comparison Group | 1.7                 | 1.41                |
|                                   | Risk Difference       | 0.59 (0.3 to 0.89)  | 0.68 (0.35 to 1.03) |
|                                   | p-value               | <0.001              | <0.001              |
| > Ischemic Stroke and Sequelae    | SARS-CoV-2 Group      | 2.03                | 1.87                |
|                                   | 2019 Comparison Group | 1.52                | 1.24                |
|                                   | Risk Difference       | 0.52 (0.26 to 0.79) | 0.62 (0.34 to 0.93) |
|                                   | p-value               | <0.001              | <0.001              |
| > Hemorrhagic Stroke and Sequelae | SARS-CoV-2 Group      | 1.36                | 1.23                |
|                                   | 2019 Comparison Group | 0.96                | 0.76                |
|                                   | Risk Difference       | 0.4 (0.2 to 0.6)    | 0.47 (0.21 to 0.74) |
|                                   | p-value               | <0.001              | <0.001              |
| <b>Mental Health</b>              |                       |                     |                     |

|                           |                       |                      |                     |
|---------------------------|-----------------------|----------------------|---------------------|
| Mental Health Diagnosis   | SARS-CoV-2 Group      | 5.78                 | 5.29                |
|                           | 2019 Comparison Group | 4.12                 | 3.58                |
|                           | Risk Difference       | 1.66 (1.21 to 2.22)  | 1.7 (1.15 to 2.37)  |
|                           | p-value               | <0.001               | <0.001              |
| Psychosis                 | SARS-CoV-2 Group      | 0.37                 | 0.25                |
|                           | 2019 Comparison Group | 0.22                 | 0.1                 |
|                           | Risk Difference       | 0.15 (0.02 to 0.27)  | 0.15 (0.06 to 0.26) |
|                           | p-value               | <0.001               | <0.001              |
| <b>Neurologic</b>         |                       |                      |                     |
| Amnesia/Memory Difficulty | SARS-CoV-2 Group      | 5.41                 | 4.62                |
|                           | 2019 Comparison Group | 3.46                 | 2.5                 |
|                           | Risk Difference       | 1.94 (1.45 to 2.37)  | 2.12 (1.66 to 2.53) |
|                           | p-value               | <0.001               | <0.001              |
| Migraine                  | SARS-CoV-2 Group      | 0.32                 | 0.37                |
|                           | 2019 Comparison Group | 0.3                  | 0.33                |
|                           | Risk Difference       | 0.02 (-0.1 to 0.16)  | 0.04 (-0.1 to 0.19) |
|                           | p-value               | 1                    | 1                   |
| Peripheral Neuropathy     | SARS-CoV-2 Group      | 0.99                 | 1.01                |
|                           | 2019 Comparison Group | 1                    | 1.01                |
|                           | Risk Difference       | -0.01 (-0.22 to 0.2) | 0 (-0.23 to 0.23)   |
|                           | p-value               | 1                    | 1                   |
| Encephalopathy            | SARS-CoV-2 Group      | 2.84                 | 2.47                |
|                           | 2019 Comparison Group | 1.3                  | 1.02                |
|                           | Risk Difference       | 1.53 (1.28 to 1.83)  | 1.44 (1.13 to 1.75) |
|                           | p-value               | <0.001               | <0.001              |
| Seizure                   | SARS-CoV-2 Group      | 0.56                 | 0.5                 |
|                           | 2019 Comparison Group | 0.44                 | 0.34                |
|                           | Risk Difference       | 0.12 (-0.02 to 0.27) | 0.15 (0 to 0.32)    |
|                           | p-value               | 0.37                 | 0.05                |
| Dementia                  | SARS-CoV-2 Group      | 2.89                 | 2.54                |
|                           | 2019 Comparison Group | 1.55                 | 1.18                |
|                           | Risk Difference       | 1.34 (0.98 to 1.67)  | 1.36 (1.05 to 1.66) |
|                           | p-value               | <0.001               | <0.001              |
| Guillain-Barre Syndrome   | SARS-CoV-2 Group      | 0.02                 | 0.02                |
|                           | 2019 Comparison Group | 0                    | 0.01                |

|                               |                       |                      |                      |
|-------------------------------|-----------------------|----------------------|----------------------|
|                               | Risk Difference       | 0.02 (0 to 0.04)     | 0.02 (-0.01 to 0.06) |
|                               | p-value               | 0.11                 | 0.8                  |
| <b>Diabetes</b>               |                       |                      |                      |
| Type 2 Diabetes               | SARS-CoV-2 Group      | 2.97                 | 2.96                 |
|                               | 2019 Comparison Group | 1.73                 | 1.63                 |
|                               | Risk Difference       | 1.24 (0.72 to 1.74)  | 1.33 (0.8 to 1.9)    |
|                               | p-value               | <0.001               | <0.001               |
| <b>Liver</b>                  |                       |                      |                      |
| Liver Test Abnormality        | SARS-CoV-2 Group      | 1.85                 | 1.85                 |
|                               | 2019 Comparison Group | 1.46                 | 1.51                 |
|                               | Risk Difference       | 0.39 (0.09 to 0.64)  | 0.34 (0.02 to 0.68)  |
|                               | p-value               | <0.001               | <0.001               |
| <b>Nephrology</b>             |                       |                      |                      |
| Kidney Injury                 | SARS-CoV-2 Group      | 6.64                 | 6.21                 |
|                               | 2019 Comparison Group | 4.78                 | 4.37                 |
|                               | Risk Difference       | 1.86 (1.29 to 2.47)  | 1.84 (1.17 to 2.46)  |
|                               | p-value               | <0.001               | <0.001               |
| > Chronic Kidney Disease      | SARS-CoV-2 Group      | 4.38                 | 4.17                 |
|                               | 2019 Comparison Group | 4                    | 3.72                 |
|                               | Risk Difference       | 0.38 (-0.14 to 0.98) | 0.45 (-0.09 to 1.02) |
|                               | p-value               | 0.58                 | 0.64                 |
| > Acute Kidney Injury         | SARS-CoV-2 Group      | 4.59                 | 4.38                 |
|                               | 2019 Comparison Group | 2.49                 | 2.29                 |
|                               | Risk Difference       | 2.1 (1.71 to 2.46)   | 2.09 (1.75 to 2.52)  |
|                               | p-value               | <0.001               | <0.001               |
| <b>Respiratory</b>            |                       |                      |                      |
| Respiratory Failure           | SARS-CoV-2 Group      | 9.15                 | 9.19                 |
|                               | 2019 Comparison Group | 2.03                 | 1.89                 |
|                               | Risk Difference       | 7.12 (6.66 to 7.55)  | 7.3 (6.8 to 7.72)    |
|                               | p-value               | <0.001               | <0.001               |
| > Acute Respiratory Failure   | SARS-CoV-2 Group      | 8.04                 | 8.07                 |
|                               | 2019 Comparison Group | 1.5                  | 1.36                 |
|                               | Risk Difference       | 6.54 (6.18 to 6.88)  | 6.71 (6.27 to 7.12)  |
|                               | p-value               | <0.001               | <0.001               |
| > Chronic Respiratory Failure | SARS-CoV-2 Group      | 1.39                 | 1.43                 |

|                                  |                       |                       |                       |
|----------------------------------|-----------------------|-----------------------|-----------------------|
|                                  | 2019 Comparison Group | 0.46                  | 0.45                  |
|                                  | Risk Difference       | 0.93 (0.77 to 1.13)   | 0.98 (0.76 to 1.19)   |
|                                  | p-value               | <0.001                | <0.001                |
| > Interstitial Lung Disease      | SARS-CoV-2 Group      | 1.39                  | 1.45                  |
|                                  | 2019 Comparison Group | 0.61                  | 0.59                  |
|                                  | Risk Difference       | 0.79 (0.61 to 0.98)   | 0.86 (0.61 to 1.08)   |
|                                  | p-value               | <0.001                | <0.001                |
| <b>Dermatologic</b>              |                       |                       |                       |
| Atopic Dermatitis                | SARS-CoV-2 Group      | 0.25                  | 0.25                  |
|                                  | 2019 Comparison Group | 0.3                   | 0.3                   |
|                                  | Risk Difference       | -0.05 (-0.17 to 0.06) | -0.06 (-0.18 to 0.06) |
|                                  | p-value               | 1                     | 1                     |
| Urticaria                        | SARS-CoV-2 Group      | 0.18                  | 0.18                  |
|                                  | 2019 Comparison Group | 0.19                  | 0.2                   |
|                                  | Risk Difference       | -0.01 (-0.09 to 0.07) | -0.01 (-0.11 to 0.11) |
|                                  | p-value               | 1                     | 1                     |
| Herpesviral Vesicular Dermatitis | SARS-CoV-2 Group      | 0.09                  | 0.09                  |
|                                  | 2019 Comparison Group | 0.07                  | 0.08                  |
|                                  | Risk Difference       | 0.02 (-0.04 to 0.09)  | 0.01 (-0.06 to 0.07)  |
|                                  | p-value               | 1                     | 1                     |
| <b>Others</b>                    |                       |                       |                       |
| Sleep Apnea                      | SARS-CoV-2 Group      | 1.52                  | 1.5                   |
|                                  | 2019 Comparison Group | 1.43                  | 1.5                   |
|                                  | Risk Difference       | 0.09 (-0.17 to 0.35)  | 0 (-0.3 to 0.34)      |
|                                  | p-value               | 1                     | 1                     |
| <b>Hematology</b>                |                       |                       |                       |
| Thrombocytopenia                 | SARS-CoV-2 Group      | 0.95                  | 0.94                  |
|                                  | 2019 Comparison Group | 0.57                  | 0.55                  |
|                                  | Risk Difference       | 0.38 (0.2 to 0.56)    | 0.39 (0.19 to 0.58)   |
|                                  | p-value               | <0.001                | <0.001                |
| Leukopenia                       | SARS-CoV-2 Group      | 0.29                  | 0.27                  |
|                                  | 2019 Comparison Group | 0.13                  | 0.13                  |
|                                  | Risk Difference       | 0.16 (0.08 to 0.26)   | 0.13 (0.03 to 0.24)   |
|                                  | p-value               | <0.001                | <0.001                |



|                     |                       |                       |                      |
|---------------------|-----------------------|-----------------------|----------------------|
| Anemia              | SARS-CoV-2 Group      | 3.3                   | 3.07                 |
|                     | 2019 Comparison Group | 2.19                  | 2.04                 |
|                     | Risk Difference       | 1.11 (0.74 to 1.52)   | 1.02 (0.63 to 1.45)  |
|                     | p-value               | <0.001                | <0.001               |
| <b>Symptom</b>      |                       |                       |                      |
| Myalgia             | SARS-CoV-2 Group      | 8.11                  | 7.88                 |
|                     | 2019 Comparison Group | 6.99                  | 6.75                 |
|                     | Risk Difference       | 1.12 (0.38 to 1.86)   | 1.13 (0.31 to 1.9)   |
|                     | p-value               | <0.001                | <0.001               |
| Fatigue Diagnosis   | SARS-CoV-2 Group      | 10.74                 | 10.33                |
|                     | 2019 Comparison Group | 6.36                  | 5.73                 |
|                     | Risk Difference       | 4.39 (3.7 to 5.21)    | 4.6 (3.8 to 5.42)    |
|                     | p-value               | <0.001                | <0.001               |
| > Fatigue           | SARS-CoV-2 Group      | 10.61                 | 10.18                |
|                     | 2019 Comparison Group | 6.35                  | 5.72                 |
|                     | Risk Difference       | 4.26 (3.54 to 4.9)    | 4.45 (3.57 to 5.13)  |
|                     | p-value               | <0.001                | <0.001               |
| > Chronic Fatigue   | SARS-CoV-2 Group      | 0.37                  | 0.38                 |
|                     | 2019 Comparison Group | 0.42                  | 0.44                 |
|                     | Risk Difference       | -0.05 (-0.16 to 0.08) | -0.06 (-0.23 to 0.1) |
|                     | p-value               | 1                     | 1                    |
| > Postviral Fatigue | SARS-CoV-2 Group      | 0.25                  | 0.24                 |
|                     | 2019 Comparison Group | 0.02                  | 0.03                 |
|                     | Risk Difference       | 0.22 (0.16 to 0.3)    | 0.21 (0.14 to 0.3)   |
|                     | p-value               | <0.001                | <0.001               |
| Anosmia             | SARS-CoV-2 Group      | 0.07                  | 0.08                 |
|                     | 2019 Comparison Group | 0.03                  | 0.03                 |
|                     | Risk Difference       | 0.04 (-0.01 to 0.08)  | 0.05 (-0.01 to 0.11) |
|                     | p-value               | 0.26                  | 0.11                 |

The 2019 Comparison with Balanced Dementia Group consists of the matched SARS-CoV-2 and 2019 comparison groups already filtered based on having at least 21 days of observation from the index date and having either both none or with prior dementia comorbidity.

Cumulative incidence was obtained by Kaplan-Meier estimator at 120 days after the start of the post-acute phase (index date + 21 days), which is 141 days after index date.

Confidence intervals were calculated based on the Bonferroni correction, i.e.,  $(1 - 0.05/N)$  confidence interval.

Individuals were excluded if they had less than 21 days of observation from the index date, had already been diagnosed with the outcome of interest prior to acute phase, or their matched pair was excluded for the same reasons.

Table 4d: Incidence Rates and Hazard Ratio for Clinical Sequelae in the Post-Acute Phase by SARS-CoV-2 Infection and 2019 Comparison Group Before and After Exactly Matching Prior Dementia Comorbidity

| Clinical Sequelae               | Category                                               | 2019 Comparison         | 2019 Comparison with Balanced Dementia |
|---------------------------------|--------------------------------------------------------|-------------------------|----------------------------------------|
|                                 | <b>Matched Group Size</b>                              | <b>88,070 vs 88,070</b> | <b>63,945 vs 63,945</b>                |
|                                 | <b>Outcome Observation Period (Days): Median (IQR)</b> | <b>62 (22 - 149)</b>    | <b>63 (22 - 150)</b>                   |
| <b>Hypertension</b>             |                                                        |                         |                                        |
| Hypertension                    | SARS-CoV-2 Group                                       | 356/919.19 (0.3873)     | 290/791.83 (0.3662)                    |
|                                 | 2019 Comparison Group                                  | 213/992.2 (0.2147)      | 176/847.14 (0.2078)                    |
|                                 | Hazard Ratio (CI)                                      | 1.88 (1.41 to 2.5)      | 1.83 (1.34 to 2.52)                    |
|                                 | p-value                                                | <0.001                  | <0.001                                 |
| <b>Pulmonary Hypertension</b>   |                                                        |                         |                                        |
| Pulmonary Hypertension          | SARS-CoV-2 Group                                       | 594/19431.36 (0.0306)   | 438/14234.99 (0.0308)                  |
|                                 | 2019 Comparison Group                                  | 538/21106.98 (0.0255)   | 389/15461.9 (0.0252)                   |
|                                 | Hazard Ratio (CI)                                      | 1.19 (0.98 to 1.44)     | 1.21 (0.96 to 1.52)                    |
|                                 | p-value                                                | 0.1                     | 0.17                                   |
| <b>Cardiology</b>               |                                                        |                         |                                        |
| <b>Cardiac Rhythm Disorders</b> |                                                        |                         |                                        |
| Cardiac Rhythm Disorders        | SARS-CoV-2 Group                                       | 2378/15901.87 (0.1495)  | 1714/11867.2 (0.1444)                  |
|                                 | 2019 Comparison Group                                  | 1671/17252.28 (0.0969)  | 1168/12843.29 (0.0909)                 |
|                                 | Hazard Ratio (CI)                                      | 1.54 (1.39 to 1.71)     | 1.58 (1.4 to 1.79)                     |
|                                 | p-value                                                | <0.001                  | <0.001                                 |
| <b>&gt; Cardiac Arrhythmia</b>  |                                                        |                         |                                        |
| > Cardiac Arrhythmia            | SARS-CoV-2 Group                                       | 1521/17412.78 (0.0873)  | 1104/12911.83 (0.0855)                 |
|                                 | 2019 Comparison Group                                  | 1251/18889.14 (0.0662)  | 876/13988.36 (0.0626)                  |
|                                 | Hazard Ratio (CI)                                      | 1.31 (1.16 to 1.49)     | 1.36 (1.17 to 1.58)                    |
|                                 | p-value                                                | <0.001                  | <0.001                                 |
| <b>&gt; Tachycardia</b>         |                                                        |                         |                                        |
| > Tachycardia                   | SARS-CoV-2 Group                                       | 1635/18209.86 (0.0898)  | 1172/13443.85 (0.0872)                 |
|                                 | 2019 Comparison Group                                  | 936/19820.75 (0.0472)   | 641/14581.65 (0.0440)                  |
|                                 | Hazard Ratio (CI)                                      | 1.89 (1.65 to 2.16)     | 1.97 (1.67 to 2.31)                    |
|                                 | p-value                                                | <0.001                  | <0.001                                 |
| <b>&gt; POTs</b>                |                                                        |                         |                                        |
| > POTs                          | SARS-CoV-2 Group                                       | 697/19465.86 (0.0358)   | 491/14325.17 (0.0343)                  |
|                                 | 2019 Comparison Group                                  | 548/21227.65 (0.0258)   | 368/15596.82 (0.0236)                  |
|                                 | Hazard Ratio (CI)                                      | 1.38 (1.14 to 1.66)     | 1.44 (1.15 to 1.81)                    |
|                                 | p-value                                                | <0.001                  | <0.001                                 |

|                                |                       |                        |                        |
|--------------------------------|-----------------------|------------------------|------------------------|
| CHF Cardiomyopathy Myocarditis | SARS-CoV-2 Group      | 1557/16162.34 (0.0963) | 1156/12042.25 (0.0960) |
|                                | 2019 Comparison Group | 1138/17441.78 (0.0652) | 794/12957.93 (0.0613)  |
|                                | Hazard Ratio (CI)     | 1.46 (1.28 to 1.66)    | 1.55 (1.33 to 1.8)     |
|                                | p-value               | <0.001                 | <0.001                 |
| > Congestive Heart Failure     | SARS-CoV-2 Group      | 1456/16902.5 (0.0861)  | 1069/12569.02 (0.0851) |
|                                | 2019 Comparison Group | 1097/18282.16 (0.0600) | 760/13571.09 (0.0560)  |
|                                | Hazard Ratio (CI)     | 1.42 (1.24 to 1.62)    | 1.5 (1.28 to 1.75)     |
|                                | p-value               | <0.001                 | <0.001                 |
| > Cardiomyopathy               | SARS-CoV-2 Group      | 617/18770.49 (0.0329)  | 462/13780.6 (0.0335)   |
|                                | 2019 Comparison Group | 501/20381.55 (0.0246)  | 370/14918.64 (0.0248)  |
|                                | Hazard Ratio (CI)     | 1.32 (1.09 to 1.61)    | 1.34 (1.06 to 1.69)    |
|                                | p-value               | <0.001                 | <0.001                 |
| > Myocarditis                  | SARS-CoV-2 Group      | 27/20536.11 (0.0013)   | 22/15021.56 (0.0015)   |
|                                | 2019 Comparison Group | 9/22405.85 (0.0004)    | 7/16376.86 (0.0004)    |
|                                | Hazard Ratio (CI)     | 3.19 (0.9 to 11.32)    | 3.35 (0.81 to 13.89)   |
|                                | p-value               | 0.06                   | 0.13                   |
| Coronary Disease               | SARS-CoV-2 Group      | 1049/19201.05 (0.0546) | 767/14110.95 (0.0544)  |
|                                | 2019 Comparison Group | 720/20890.08 (0.0345)  | 508/15335.82 (0.0331)  |
|                                | Hazard Ratio (CI)     | 1.57 (1.34 to 1.83)    | 1.62 (1.34 to 1.95)    |
|                                | p-value               | <0.001                 | <0.001                 |
| > Myocardial Infarction        | SARS-CoV-2 Group      | 891/19563.16 (0.0455)  | 651/14365.69 (0.0453)  |
|                                | 2019 Comparison Group | 578/21284.78 (0.0272)  | 399/15607.76 (0.0256)  |
|                                | Hazard Ratio (CI)     | 1.65 (1.39 to 1.97)    | 1.75 (1.42 to 2.15)    |
|                                | p-value               | <0.001                 | <0.001                 |
| > Acute Coronary Syndrome      | SARS-CoV-2 Group      | 1043/19205.98 (0.0543) | 763/14112.08 (0.0541)  |
|                                | 2019 Comparison Group | 714/20893.73 (0.0342)  | 506/15337.15 (0.0330)  |
|                                | Hazard Ratio (CI)     | 1.57 (1.34 to 1.84)    | 1.62 (1.34 to 1.95)    |
|                                | p-value               | <0.001                 | <0.001                 |
| Cardiogenic Shock              | SARS-CoV-2 Group      | 88/20482.64 (0.0043)   | 64/14981.79 (0.0043)   |
|                                | 2019 Comparison Group | 69/22341.75 (0.0031)   | 45/16325.16 (0.0028)   |
|                                | Hazard Ratio (CI)     | 1.37 (0.81 to 2.33)    | 1.52 (0.8 to 2.89)     |
|                                | p-value               | 1                      | 0.8                    |
| Hypercoagulability DVT PE PAO  | SARS-CoV-2 Group      | 2094/18049.31 (0.1160) | 1502/13354.35 (0.1125) |

|                                   |                       |                        |                        |
|-----------------------------------|-----------------------|------------------------|------------------------|
|                                   | 2019 Comparison Group | 952/19687.71 (0.0484)  | 659/14534.88 (0.0453)  |
|                                   | Hazard Ratio (CI)     | 2.36 (2.08 to 2.69)    | 2.44 (2.1 to 2.85)     |
|                                   | p-value               | <0.001                 | <0.001                 |
| > Hypercoagulability              | SARS-CoV-2 Group      | 1428/18627.56 (0.0767) | 1009/13742.25 (0.0734) |
|                                   | 2019 Comparison Group | 759/20338.78 (0.0373)  | 520/14977.1 (0.0347)   |
|                                   | Hazard Ratio (CI)     | 2.03 (1.75 to 2.35)    | 2.08 (1.74 to 2.48)    |
|                                   | p-value               | <0.001                 | <0.001                 |
| > Deep Vein Thrombosis            | SARS-CoV-2 Group      | 1039/19374.24 (0.0536) | 718/14252.28 (0.0504)  |
|                                   | 2019 Comparison Group | 463/21159.16 (0.0219)  | 302/15542.63 (0.0194)  |
|                                   | Hazard Ratio (CI)     | 2.4 (2 to 2.89)        | 2.54 (2.02 to 3.18)    |
|                                   | p-value               | <0.001                 | <0.001                 |
| > Pulmonary Embolism              | SARS-CoV-2 Group      | 902/19967.13 (0.0452)  | 646/14630.94 (0.0442)  |
|                                   | 2019 Comparison Group | 215/21759.37 (0.0099)  | 140/15925.09 (0.0088)  |
|                                   | Hazard Ratio (CI)     | 4.41 (3.44 to 5.66)    | 4.85 (3.57 to 6.59)    |
|                                   | p-value               | <0.001                 | <0.001                 |
| > Peripheral Arterial Occlusions  | SARS-CoV-2 Group      | 275/20161.43 (0.0136)  | 202/14772.13 (0.0137)  |
|                                   | 2019 Comparison Group | 181/21999.07 (0.0082)  | 128/16109.2 (0.0079)   |
|                                   | Hazard Ratio (CI)     | 1.64 (1.19 to 2.25)    | 1.7 (1.17 to 2.46)     |
|                                   | p-value               | <0.001                 | <0.001                 |
| Stroke and Sequelae               | SARS-CoV-2 Group      | 1328/17602.23 (0.0754) | 924/13308.85 (0.0694)  |
|                                   | 2019 Comparison Group | 979/19239.95 (0.0509)  | 607/14508.28 (0.0418)  |
|                                   | Hazard Ratio (CI)     | 1.46 (1.27 to 1.68)    | 1.63 (1.37 to 1.94)    |
|                                   | p-value               | <0.001                 | <0.001                 |
| > Ischemic Stroke and Sequelae    | SARS-CoV-2 Group      | 1198/17810.78 (0.0673) | 833/13431.61 (0.0620)  |
|                                   | 2019 Comparison Group | 876/19471.46 (0.0450)  | 538/14649.43 (0.0367)  |
|                                   | Hazard Ratio (CI)     | 1.47 (1.27 to 1.7)     | 1.66 (1.38 to 1.99)    |
|                                   | p-value               | <0.001                 | <0.001                 |
| > Hemorrhagic Stroke and Sequelae | SARS-CoV-2 Group      | 851/18777.63 (0.0453)  | 574/14028.26 (0.0409)  |
|                                   | 2019 Comparison Group | 615/20525.44 (0.0300)  | 364/15299.9 (0.0238)   |
|                                   | Hazard Ratio (CI)     | 1.48 (1.24 to 1.76)    | 1.68 (1.35 to 2.09)    |
|                                   | p-value               | <0.001                 | <0.001                 |
| <b>Mental Health</b>              |                       |                        |                        |

|                           |                       |                        |                        |
|---------------------------|-----------------------|------------------------|------------------------|
| Mental Health Diagnosis   | SARS-CoV-2 Group      | 2188/12296.92 (0.1779) | 1585/9778.15 (0.1621)  |
|                           | 2019 Comparison Group | 1630/13397.87 (0.1217) | 1114/10648.11 (0.1046) |
|                           | Hazard Ratio (CI)     | 1.46 (1.31 to 1.63)    | 1.55 (1.36 to 1.76)    |
|                           | p-value               | <0.001                 | <0.001                 |
| Psychosis                 | SARS-CoV-2 Group      | 240/20090.12 (0.0119)  | 122/14862.71 (0.0082)  |
|                           | 2019 Comparison Group | 146/21916.95 (0.0067)  | 54/16207.73 (0.0033)   |
|                           | Hazard Ratio (CI)     | 1.77 (1.25 to 2.5)     | 2.43 (1.42 to 4.16)    |
|                           | p-value               | <0.001                 | <0.001                 |
| <b>Neurologic</b>         |                       |                        |                        |
| Amnesia/Memory Difficulty | SARS-CoV-2 Group      | 2578/15008.48 (0.1718) | 1813/12422.42 (0.1459) |
|                           | 2019 Comparison Group | 1754/16295.79 (0.1076) | 1038/13501.69 (0.0769) |
|                           | Hazard Ratio (CI)     | 1.59 (1.43 to 1.76)    | 1.89 (1.66 to 2.14)    |
|                           | p-value               | <0.001                 | <0.001                 |
| Migraine                  | SARS-CoV-2 Group      | 193/19979.72 (0.0097)  | 159/14603.85 (0.0109)  |
|                           | 2019 Comparison Group | 201/21782.62 (0.0092)  | 152/15900.98 (0.0096)  |
|                           | Hazard Ratio (CI)     | 1.04 (0.75 to 1.45)    | 1.13 (0.78 to 1.65)    |
|                           | p-value               | 1                      | 1                      |
| Peripheral Neuropathy     | SARS-CoV-2 Group      | 569/19082.88 (0.0298)  | 415/13997.08 (0.0296)  |
|                           | 2019 Comparison Group | 612/20796.75 (0.0294)  | 451/15259.24 (0.0296)  |
|                           | Hazard Ratio (CI)     | 1.01 (0.83 to 1.22)    | 0.99 (0.8 to 1.24)     |
|                           | p-value               | 1                      | 1                      |
| Encephalopathy            | SARS-CoV-2 Group      | 1803/18840.72 (0.0957) | 1179/14202.65 (0.0830) |
|                           | 2019 Comparison Group | 847/20520.7 (0.0413)   | 489/15471.26 (0.0316)  |
|                           | Hazard Ratio (CI)     | 2.28 (1.99 to 2.61)    | 2.57 (2.16 to 3.07)    |
|                           | p-value               | <0.001                 | <0.001                 |
| Seizure                   | SARS-CoV-2 Group      | 349/19723.05 (0.0177)  | 225/14568.38 (0.0154)  |
|                           | 2019 Comparison Group | 280/21524.97 (0.0130)  | 158/15876.42 (0.0100)  |
|                           | Hazard Ratio (CI)     | 1.35 (1.04 to 1.76)    | 1.54 (1.09 to 2.16)    |
|                           | p-value               | 0.005                  | <0.001                 |
| Dementia                  | SARS-CoV-2 Group      | 1315/14705.27 (0.0894) | 1120/14228.56 (0.0787) |
|                           | 2019 Comparison Group | 755/16007.51 (0.0472)  | 561/15527.75 (0.0361)  |
|                           | Hazard Ratio (CI)     | 1.87 (1.61 to 2.18)    | 2.15 (1.82 to 2.55)    |
|                           | p-value               | <0.001                 | <0.001                 |
| Guillain-Barre Syndrome   | SARS-CoV-2 Group      | 15/20527.07 (0.0007)   | 11/15014.59 (0.0007)   |
|                           | 2019 Comparison Group | 3/22396.38 (0.0001)    | 3/16368.41 (0.0002)    |

|                               |                       |                        |                        |
|-------------------------------|-----------------------|------------------------|------------------------|
|                               | Hazard Ratio (CI)     | 5.23 (0.64 to 42.64)   | 3.84 (0.44 to 33.46)   |
|                               | p-value               | 0.24                   | 1                      |
| <b>Diabetes</b>               |                       |                        |                        |
| Type 2 Diabetes               | SARS-CoV-2 Group      | 704/7599.69 (0.0926)   | 533/5756.93 (0.0926)   |
|                               | 2019 Comparison Group | 450/8421.53 (0.0534)   | 318/6326.39 (0.0503)   |
|                               | Hazard Ratio (CI)     | 1.72 (1.41 to 2.1)     | 1.83 (1.45 to 2.32)    |
|                               | p-value               | <0.001                 | <0.001                 |
| <b>Liver</b>                  |                       |                        |                        |
| Liver Test Abnormality        | SARS-CoV-2 Group      | 1019/18324.53 (0.0556) | 755/13361.1 (0.0565)   |
|                               | 2019 Comparison Group | 875/20015.15 (0.0437)  | 648/14594.56 (0.0444)  |
|                               | Hazard Ratio (CI)     | 1.26 (1.08 to 1.47)    | 1.26 (1.06 to 1.5)     |
|                               | p-value               | <0.001                 | <0.001                 |
| <b>Nephrology</b>             |                       |                        |                        |
| Kidney Injury                 | SARS-CoV-2 Group      | 2541/11569.58 (0.2196) | 1843/8892.22 (0.2073)  |
|                               | 2019 Comparison Group | 1753/12339.32 (0.1421) | 1231/9414.03 (0.1308)  |
|                               | Hazard Ratio (CI)     | 1.54 (1.39 to 1.71)    | 1.58 (1.4 to 1.79)     |
|                               | p-value               | <0.001                 | <0.001                 |
| > Chronic Kidney Disease      | SARS-CoV-2 Group      | 1663/12298.47 (0.1352) | 1209/9325.35 (0.1296)  |
|                               | 2019 Comparison Group | 1545/13142.37 (0.1176) | 1086/9898.06 (0.1097)  |
|                               | Hazard Ratio (CI)     | 1.14 (1.02 to 1.28)    | 1.17 (1.02 to 1.35)    |
|                               | p-value               | 0.004                  | 0.003                  |
| > Acute Kidney Injury         | SARS-CoV-2 Group      | 2868/17517.41 (0.1637) | 2038/13102.7 (0.1555)  |
|                               | 2019 Comparison Group | 1419/18962.33 (0.0748) | 959/14170.73 (0.0677)  |
|                               | Hazard Ratio (CI)     | 2.16 (1.94 to 2.4)     | 2.26 (1.99 to 2.57)    |
|                               | p-value               | <0.001                 | <0.001                 |
| <b>Respiratory</b>            |                       |                        |                        |
| Respiratory Failure           | SARS-CoV-2 Group      | 5997/17834.79 (0.3363) | 4433/13189.56 (0.3361) |
|                               | 2019 Comparison Group | 1228/19365.8 (0.0634)  | 849/14303.53 (0.0594)  |
|                               | Hazard Ratio (CI)     | 5.27 (4.76 to 5.83)    | 5.62 (4.98 to 6.35)    |
|                               | p-value               | <0.001                 | <0.001                 |
| > Acute Respiratory Failure   | SARS-CoV-2 Group      | 5760/18908 (0.3046)    | 4244/13945.56 (0.3043) |
|                               | 2019 Comparison Group | 956/20579.4 (0.0465)   | 642/15161.58 (0.0423)  |
|                               | Hazard Ratio (CI)     | 6.45 (5.75 to 7.22)    | 7.06 (6.15 to 8.11)    |
|                               | p-value               | <0.001                 | <0.001                 |
| > Chronic Respiratory Failure | SARS-CoV-2 Group      | 855/19813.77 (0.0432)  | 636/14521.3 (0.0438)   |

|                                  |                       |                       |                       |
|----------------------------------|-----------------------|-----------------------|-----------------------|
|                                  | 2019 Comparison Group | 288/21557.88 (0.0134) | 204/15782.77 (0.0129) |
|                                  | Hazard Ratio (CI)     | 3.17 (2.53 to 3.96)   | 3.32 (2.54 to 4.32)   |
|                                  | p-value               | <0.001                | <0.001                |
| > Interstitial Lung Disease      | SARS-CoV-2 Group      | 817/19639.86 (0.0416) | 623/14399.02 (0.0433) |
|                                  | 2019 Comparison Group | 410/21402.35 (0.0192) | 292/15679.52 (0.0186) |
|                                  | Hazard Ratio (CI)     | 2.15 (1.76 to 2.63)   | 2.3 (1.82 to 2.91)    |
|                                  | p-value               | <0.001                | <0.001                |
| <b>Dermatologic</b>              |                       |                       |                       |
| Atopic Dermatitis                | SARS-CoV-2 Group      | 158/20144.34 (0.0078) | 118/14741.72 (0.0080) |
|                                  | 2019 Comparison Group | 195/21982.88 (0.0089) | 146/16067.5 (0.0091)  |
|                                  | Hazard Ratio (CI)     | 0.88 (0.62 to 1.26)   | 0.88 (0.58 to 1.32)   |
|                                  | p-value               | 1                     | 1                     |
| Urticaria                        | SARS-CoV-2 Group      | 111/20289.79 (0.0055) | 84/14838.32 (0.0057)  |
|                                  | 2019 Comparison Group | 132/22140.13 (0.0060) | 105/16174.79 (0.0065) |
|                                  | Hazard Ratio (CI)     | 0.91 (0.59 to 1.4)    | 0.87 (0.53 to 1.41)   |
|                                  | p-value               | 1                     | 1                     |
| Herpesviral Vesicular Dermatitis | SARS-CoV-2 Group      | 49/20459.65 (0.0024)  | 36/14960.99 (0.0024)  |
|                                  | 2019 Comparison Group | 46/22320.38 (0.0021)  | 34/16309.28 (0.0021)  |
|                                  | Hazard Ratio (CI)     | 1.16 (0.59 to 2.27)   | 1.15 (0.52 to 2.52)   |
|                                  | p-value               | 1                     | 1                     |
| <b>Others</b>                    |                       |                       |                       |
| Sleep Apnea                      | SARS-CoV-2 Group      | 755/16830.42 (0.0449) | 547/12265.01 (0.0446) |
|                                  | 2019 Comparison Group | 749/18230.44 (0.0411) | 561/13265.74 (0.0423) |
|                                  | Hazard Ratio (CI)     | 1.08 (0.91 to 1.28)   | 1.04 (0.86 to 1.27)   |
|                                  | p-value               | 1                     | 1                     |
| <b>Hematology</b>                |                       |                       |                       |
| Thrombocytopenia                 | SARS-CoV-2 Group      | 600/19618.55 (0.0306) | 443/14377.61 (0.0308) |
|                                  | 2019 Comparison Group | 353/21374.12 (0.0165) | 255/15661.17 (0.0163) |
|                                  | Hazard Ratio (CI)     | 1.82 (1.46 to 2.27)   | 1.86 (1.44 to 2.4)    |
|                                  | p-value               | <0.001                | <0.001                |
| Leukopenia                       | SARS-CoV-2 Group      | 192/20296.89 (0.0095) | 132/14853.37 (0.0089) |
|                                  | 2019 Comparison Group | 96/22136.37 (0.0043)  | 74/16188.14 (0.0046)  |
|                                  | Hazard Ratio (CI)     | 2.15 (1.42 to 3.24)   | 1.92 (1.19 to 3.1)    |
|                                  | p-value               | <0.001                | <0.001                |

|                     |                       |                        |                        |
|---------------------|-----------------------|------------------------|------------------------|
| Anemia              | SARS-CoV-2 Group      | 1659/16780.08 (0.0989) | 1168/12502.27 (0.0934) |
|                     | 2019 Comparison Group | 1207/18336.4 (0.0658)  | 831/13616.53 (0.0610)  |
|                     | Hazard Ratio (CI)     | 1.49 (1.32 to 1.69)    | 1.52 (1.31 to 1.77)    |
|                     | p-value               | <0.001                 | <0.001                 |
| <b>Symptom</b>      |                       |                        |                        |
| Myalgia             | SARS-CoV-2 Group      | 2743/11165.02 (0.2457) | 2030/8580.47 (0.2366)  |
|                     | 2019 Comparison Group | 2539/12120.13 (0.2095) | 1869/9309.34 (0.2008)  |
|                     | Hazard Ratio (CI)     | 1.17 (1.07 to 1.28)    | 1.17 (1.06 to 1.31)    |
|                     | p-value               | <0.001                 | <0.001                 |
| Fatigue Diagnosis   | SARS-CoV-2 Group      | 4144/11999.75 (0.3453) | 3148/9498.04 (0.3314)  |
|                     | 2019 Comparison Group | 2518/13088.68 (0.1924) | 1780/10333.45 (0.1723) |
|                     | Hazard Ratio (CI)     | 1.82 (1.68 to 1.98)    | 1.95 (1.77 to 2.15)    |
|                     | p-value               | <0.001                 | <0.001                 |
| > Fatigue           | SARS-CoV-2 Group      | 4100/12012.6 (0.3413)  | 3107/9507.39 (0.3268)  |
|                     | 2019 Comparison Group | 2518/13102.79 (0.1922) | 1780/10344.75 (0.1721) |
|                     | Hazard Ratio (CI)     | 1.8 (1.66 to 1.95)     | 1.93 (1.75 to 2.12)    |
|                     | p-value               | <0.001                 | <0.001                 |
| > Chronic Fatigue   | SARS-CoV-2 Group      | 235/20029.17 (0.0117)  | 171/14657.87 (0.0117)  |
|                     | 2019 Comparison Group | 264/21858.93 (0.0121)  | 197/15987.13 (0.0123)  |
|                     | Hazard Ratio (CI)     | 0.96 (0.72 to 1.3)     | 0.94 (0.67 to 1.33)    |
|                     | p-value               | 1                      | 1                      |
| > Postviral Fatigue | SARS-CoV-2 Group      | 153/20496.78 (0.0075)  | 110/15001.38 (0.0073)  |
|                     | 2019 Comparison Group | 14/22362.27 (0.0006)   | 10/16353.99 (0.0006)   |
|                     | Hazard Ratio (CI)     | 11.52 (4.58 to 29)     | 11.61 (3.89 to 34.6)   |
|                     | p-value               | <0.001                 | <0.001                 |
| Anosmia             | SARS-CoV-2 Group      | 48/20510.01 (0.0023)   | 40/14999.94 (0.0027)   |
|                     | 2019 Comparison Group | 14/22375.2 (0.0006)    | 10/16352.06 (0.0006)   |
|                     | Hazard Ratio (CI)     | 3.75 (1.37 to 10.25)   | 4.34 (1.34 to 14.03)   |
|                     | p-value               | <0.001                 | <0.001                 |

The 2019 Comparison with Balanced Dementia Group consists of the matched SARS-CoV-2 and 2019 comparison groups already filtered based on having at least 21 days of observation from the index date and having either both none or with prior dementia comorbidity.

Denominator for incidence of each outcome is person-year for individuals at-risk starting at the start of the post-acute phase (index date + 21 days).

Confidence intervals were calculated based on the Bonferroni correction, i.e.,  $(1 - 0.05/N)$  confidence interval.

Individuals were excluded if they had less than 21 days of observation from the index date, had already been diagnosed with the outcome of interest prior to acute phase, or their matched pair was excluded for the same reasons.



Table 5a: Cumulative Incidence and Risk Difference per 100 Individuals of the SARS-CoV-2 and 2020 Comparison Group for Clinical Sequelae in the Post-Acute Phase by Age

| Clinical Sequelae               | Category              | 65–74               | >74                 | p-interaction |
|---------------------------------|-----------------------|---------------------|---------------------|---------------|
|                                 | Matched Group Size    | 40,051 vs 40,051    | 46,350 vs 46,350    |               |
| <b>Hypertension</b>             |                       |                     |                     |               |
| Hypertension                    | SARS-CoV-2 Group      | 10.08               | 16.25               |               |
|                                 | 2020 Comparison Group | 6.15                | 7.28                |               |
|                                 | Risk Difference       | 3.93 (1.52 to 6.11) | 8.96 (4.7 to 13.54) |               |
|                                 | p-value               | <0.001              | <0.001              | 0.03          |
| <b>Pulmonary Hypertension</b>   |                       |                     |                     |               |
| Pulmonary Hypertension          | SARS-CoV-2 Group      | 0.71                | 1.26                |               |
|                                 | 2020 Comparison Group | 0.37                | 0.85                |               |
|                                 | Risk Difference       | 0.34 (0.1 to 0.57)  | 0.42 (0.11 to 0.74) |               |
|                                 | p-value               | <0.001              | <0.001              | 1             |
| <b>Cardiology</b>               |                       |                     |                     |               |
| <b>Cardiac Rhythm Disorders</b> |                       |                     |                     |               |
| Cardiac Rhythm Disorders        | SARS-CoV-2 Group      | 3.89                | 5.94                |               |
|                                 | 2020 Comparison Group | 1.98                | 3.33                |               |
|                                 | Risk Difference       | 1.91 (1.36 to 2.49) | 2.61 (1.92 to 3.2)  |               |
|                                 | p-value               | <0.001              | <0.001              | 1             |
| <b>&gt; Cardiac Arrhythmia</b>  |                       |                     |                     |               |
| > Cardiac Arrhythmia            | SARS-CoV-2 Group      | 2.11                | 3.65                |               |
|                                 | 2020 Comparison Group | 1.2                 | 2.27                |               |
|                                 | Risk Difference       | 0.9 (0.52 to 1.25)  | 1.38 (0.88 to 1.96) |               |
|                                 | p-value               | <0.001              | <0.001              | 1             |
| <b>&gt; Tachycardia</b>         |                       |                     |                     |               |
| > Tachycardia                   | SARS-CoV-2 Group      | 2.57                | 3.26                |               |
|                                 | 2020 Comparison Group | 1.15                | 1.58                |               |
|                                 | Risk Difference       | 1.42 (1 to 1.81)    | 1.68 (1.29 to 2.06) |               |
|                                 | p-value               | <0.001              | <0.001              | 1             |
| <b>&gt; POTs</b>                |                       |                     |                     |               |
| > POTs                          | SARS-CoV-2 Group      | 0.88                | 1.34                |               |

|                                |                       |                     |                      |      |
|--------------------------------|-----------------------|---------------------|----------------------|------|
|                                | 2020 Comparison Group | 0.44                | 0.8                  |      |
|                                | Risk Difference       | 0.44 (0.2 to 0.71)  | 0.54 (0.22 to 0.85)  |      |
|                                | p-value               | <0.001              | <0.001               | 1    |
| CHF Cardiomyopathy Myocarditis | SARS-CoV-2 Group      | 2.21                | 4.08                 |      |
|                                | 2020 Comparison Group | 1.12                | 2.39                 |      |
|                                | Risk Difference       | 1.09 (0.67 to 1.59) | 1.69 (1.08 to 2.28)  |      |
|                                | p-value               | <0.001              | <0.001               | 1    |
| > Congestive Heart Failure     | SARS-CoV-2 Group      | 1.82                | 3.78                 |      |
|                                | 2020 Comparison Group | 0.92                | 2.13                 |      |
|                                | Risk Difference       | 0.9 (0.56 to 1.29)  | 1.64 (1.09 to 2.18)  |      |
|                                | p-value               | <0.001              | <0.001               | 0.18 |
| > Cardiomyopathy               | SARS-CoV-2 Group      | 1.02                | 1.27                 |      |
|                                | 2020 Comparison Group | 0.55                | 0.9                  |      |
|                                | Risk Difference       | 0.46 (0.17 to 0.73) | 0.37 (0.02 to 0.72)  |      |
|                                | p-value               | <0.001              | <0.001               | 0.66 |
| > Myocarditis                  | SARS-CoV-2 Group      | 0.04                | 0.04                 |      |
|                                | 2020 Comparison Group | 0                   | 0.01                 |      |
|                                | Risk Difference       | 0.04 (0.01 to 0.09) | 0.03 (-0.02 to 0.08) |      |
|                                | p-value               | <0.001              | 1                    | 1    |
| Coronary Disease               | SARS-CoV-2 Group      | 1.3                 | 2.09                 |      |
|                                | 2020 Comparison Group | 0.63                | 1.07                 |      |
|                                | Risk Difference       | 0.67 (0.4 to 0.95)  | 1.02 (0.59 to 1.43)  |      |
|                                | p-value               | <0.001              | <0.001               | 1    |
| > Myocardial Infarction        | SARS-CoV-2 Group      | 1.08                | 1.7                  |      |
|                                | 2020 Comparison Group | 0.47                | 0.85                 |      |
|                                | Risk Difference       | 0.61 (0.38 to 0.83) | 0.85 (0.54 to 1.21)  |      |

|                               |                       |                      |                      |     |
|-------------------------------|-----------------------|----------------------|----------------------|-----|
|                               | p-value               | <0.001               | <0.001               | 1   |
| > Acute Coronary Syndrome     | SARS-CoV-2 Group      | 1.3                  | 2.07                 |     |
|                               | 2020 Comparison Group | 0.63                 | 1.06                 |     |
|                               | Risk Difference       | 0.67 (0.39 to 1.01)  | 1.01 (0.66 to 1.4)   |     |
|                               | p-value               | <0.001               | <0.001               | 1   |
| Cardiogenic Shock             | SARS-CoV-2 Group      | 0.12                 | 0.15                 |     |
|                               | 2020 Comparison Group | 0.05                 | 0.07                 |     |
|                               | Risk Difference       | 0.07 (-0.01 to 0.15) | 0.08 (-0.01 to 0.17) |     |
|                               | p-value               | 0.53                 | 0.42                 | 1   |
| Hypercoagulability DVT PE PAO | SARS-CoV-2 Group      | 2.84                 | 4                    |     |
|                               | 2020 Comparison Group | 0.92                 | 1.42                 |     |
|                               | Risk Difference       | 1.92 (1.48 to 2.3)   | 2.58 (2.14 to 3)     |     |
|                               | p-value               | <0.001               | <0.001               | 1   |
| > Hypercoagulability          | SARS-CoV-2 Group      | 1.99                 | 2.75                 |     |
|                               | 2020 Comparison Group | 0.72                 | 1.02                 |     |
|                               | Risk Difference       | 1.27 (0.94 to 1.67)  | 1.73 (1.37 to 2.18)  |     |
|                               | p-value               | <0.001               | <0.001               | 0.4 |
| > Deep Vein Thrombosis        | SARS-CoV-2 Group      | 1.4                  | 1.88                 |     |
|                               | 2020 Comparison Group | 0.42                 | 0.55                 |     |
|                               | Risk Difference       | 0.98 (0.72 to 1.27)  | 1.33 (1.03 to 1.63)  |     |
|                               | p-value               | <0.001               | <0.001               | 1   |
| > Pulmonary Embolism          | SARS-CoV-2 Group      | 0.98                 | 1.47                 |     |
|                               | 2020 Comparison Group | 0.25                 | 0.35                 |     |
|                               | Risk Difference       | 0.74 (0.51 to 0.98)  | 1.12 (0.86 to 1.37)  |     |
|                               | p-value               | <0.001               | <0.001               | 1   |

|                                   |                       |                     |                     |      |
|-----------------------------------|-----------------------|---------------------|---------------------|------|
| > Peripheral Arterial Occlusions  | SARS-CoV-2 Group      | 0.33                | 0.43                |      |
|                                   | 2020 Comparison Group | 0.15                | 0.23                |      |
|                                   | Risk Difference       | 0.18 (0.04 to 0.34) | 0.21 (0.07 to 0.36) |      |
|                                   | p-value               | <0.001              | <0.001              | 1    |
| Stroke and Sequelae               | SARS-CoV-2 Group      | 1.57                | 2.98                |      |
|                                   | 2020 Comparison Group | 0.81                | 1.83                |      |
|                                   | Risk Difference       | 0.76 (0.46 to 1.1)  | 1.15 (0.75 to 1.58) |      |
|                                   | p-value               | <0.001              | <0.001              | 1    |
| > Ischemic Stroke and Sequelae    | SARS-CoV-2 Group      | 1.41                | 2.65                |      |
|                                   | 2020 Comparison Group | 0.74                | 1.59                |      |
|                                   | Risk Difference       | 0.67 (0.38 to 1.07) | 1.06 (0.64 to 1.46) |      |
|                                   | p-value               | <0.001              | <0.001              | 1    |
| > Hemorrhagic Stroke and Sequelae | SARS-CoV-2 Group      | 0.92                | 1.73                |      |
|                                   | 2020 Comparison Group | 0.44                | 0.97                |      |
|                                   | Risk Difference       | 0.48 (0.26 to 0.75) | 0.75 (0.43 to 1.04) |      |
|                                   | p-value               | <0.001              | <0.001              | 1    |
| <b>Mental Health</b>              |                       |                     |                     |      |
| Mental Health Diagnosis           | SARS-CoV-2 Group      | 5.07                | 6.35                |      |
|                                   | 2020 Comparison Group | 3.05                | 3.36                |      |
|                                   | Risk Difference       | 2.02 (1.29 to 2.78) | 2.99 (2.28 to 3.89) |      |
|                                   | p-value               | <0.001              | <0.001              | 0.39 |
| Psychosis                         | SARS-CoV-2 Group      | 0.23                | 0.42                |      |
|                                   | 2020 Comparison Group | 0.07                | 0.15                |      |
|                                   | Risk Difference       | 0.17 (0.05 to 0.27) | 0.27 (0.12 to 0.42) |      |
|                                   | p-value               | <0.001              | <0.001              | 0.12 |

|                           |                       |                      |                      |        |
|---------------------------|-----------------------|----------------------|----------------------|--------|
| <b>Neurologic</b>         |                       |                      |                      |        |
| Amnesia/Memory Difficulty | SARS-CoV-2 Group      | 3.01                 | 7.28                 |        |
|                           | 2020 Comparison Group | 1.46                 | 3.19                 |        |
|                           | Risk Difference       | 1.55 (1.05 to 1.99)  | 4.09 (3.35 to 4.8)   |        |
|                           | p-value               | <0.001               | <0.001               | <0.001 |
| Migraine                  | SARS-CoV-2 Group      | 0.43                 | 0.23                 |        |
|                           | 2020 Comparison Group | 0.35                 | 0.18                 |        |
|                           | Risk Difference       | 0.09 (-0.07 to 0.25) | 0.04 (-0.08 to 0.19) |        |
|                           | p-value               | 1                    | 1                    | 1      |
| Peripheral Neuropathy     | SARS-CoV-2 Group      | 0.89                 | 0.98                 |        |
|                           | 2020 Comparison Group | 0.69                 | 0.85                 |        |
|                           | Risk Difference       | 0.2 (-0.04 to 0.57)  | 0.13 (-0.12 to 0.37) |        |
|                           | p-value               | 0.53                 | 1                    | 1      |
| Encephalopathy            | SARS-CoV-2 Group      | 1.75                 | 3.62                 |        |
|                           | 2020 Comparison Group | 0.49                 | 1.25                 |        |
|                           | Risk Difference       | 1.26 (0.95 to 1.53)  | 2.37 (1.85 to 2.86)  |        |
|                           | p-value               | <0.001               | <0.001               | <0.001 |
| Seizure                   | SARS-CoV-2 Group      | 0.42                 | 0.62                 |        |
|                           | 2020 Comparison Group | 0.17                 | 0.31                 |        |
|                           | Risk Difference       | 0.25 (0.1 to 0.43)   | 0.31 (0.08 to 0.54)  |        |
|                           | p-value               | <0.001               | <0.001               | 1      |
| Dementia                  | SARS-CoV-2 Group      | 0.81                 | 4.55                 |        |
|                           | 2020 Comparison Group | 0.4                  | 1.91                 |        |
|                           | Risk Difference       | 0.41 (0.17 to 0.59)  | 2.64 (2.01 to 3.23)  |        |
|                           | p-value               | <0.001               | <0.001               | <0.001 |
| Guillain-Barre Syndrome   | SARS-CoV-2 Group      | 0.03                 | 0.01                 |        |

|                          |                       |                      |                     |        |
|--------------------------|-----------------------|----------------------|---------------------|--------|
|                          | 2020 Comparison Group | 0.02                 | 0.01                |        |
|                          | Risk Difference       | 0.02 (-0.03 to 0.06) | 0 (-0.02 to 0.03)   |        |
|                          | p-value               | 1                    | 1                   | 1      |
| <b>Diabetes</b>          |                       |                      |                     |        |
| Type 2 Diabetes          | SARS-CoV-2 Group      | 2.92                 | 2.97                |        |
|                          | 2020 Comparison Group | 1.58                 | 1.26                |        |
|                          | Risk Difference       | 1.34 (0.77 to 1.94)  | 1.71 (1.09 to 2.26) |        |
|                          | p-value               | <0.001               | <0.001              | 1      |
| <b>Liver</b>             |                       |                      |                     |        |
| Liver Test Abnormality   | SARS-CoV-2 Group      | 2.15                 | 1.54                |        |
|                          | 2020 Comparison Group | 1.38                 | 1.02                |        |
|                          | Risk Difference       | 0.77 (0.31 to 1.2)   | 0.53 (0.19 to 0.87) |        |
|                          | p-value               | <0.001               | <0.001              | 0.03   |
| <b>Nephrology</b>        |                       |                      |                     |        |
| Kidney Injury            | SARS-CoV-2 Group      | 4.56                 | 8.34                |        |
|                          | 2020 Comparison Group | 2.6                  | 5.02                |        |
|                          | Risk Difference       | 1.96 (1.32 to 2.6)   | 3.32 (2.34 to 4.35) |        |
|                          | p-value               | <0.001               | <0.001              | <0.001 |
| > Chronic Kidney Disease | SARS-CoV-2 Group      | 3.05                 | 5.59                |        |
|                          | 2020 Comparison Group | 2.22                 | 4.17                |        |
|                          | Risk Difference       | 0.82 (0.32 to 1.45)  | 1.41 (0.54 to 2.3)  |        |
|                          | p-value               | <0.001               | <0.001              | 0.02   |
| > Acute Kidney Injury    | SARS-CoV-2 Group      | 3.11                 | 5.87                |        |
|                          | 2020 Comparison Group | 1.17                 | 2.37                |        |
|                          | Risk Difference       | 1.94 (1.56 to 2.38)  | 3.5 (2.96 to 4.04)  |        |
|                          | p-value               | <0.001               | <0.001              | <0.001 |
| <b>Respiratory</b>       |                       |                      |                     |        |
| Respiratory Failure      | SARS-CoV-2 Group      | 7.44                 | 10.4                |        |

|                                  |                       |                      |                      |      |
|----------------------------------|-----------------------|----------------------|----------------------|------|
|                                  | 2020 Comparison Group | 0.97                 | 1.9                  |      |
|                                  | Risk Difference       | 6.46 (5.96 to 6.97)  | 8.51 (7.79 to 9.1)   |      |
|                                  | p-value               | <0.001               | <0.001               | 0.11 |
| > Acute Respiratory Failure      | SARS-CoV-2 Group      | 6.59                 | 9.2                  |      |
|                                  | 2020 Comparison Group | 0.67                 | 1.35                 |      |
|                                  | Risk Difference       | 5.92 (5.47 to 6.39)  | 7.86 (7.28 to 8.4)   |      |
|                                  | p-value               | <0.001               | <0.001               | 0.01 |
| > Chronic Respiratory Failure    | SARS-CoV-2 Group      | 1.18                 | 1.51                 |      |
|                                  | 2020 Comparison Group | 0.28                 | 0.45                 |      |
|                                  | Risk Difference       | 0.9 (0.66 to 1.19)   | 1.06 (0.81 to 1.31)  |      |
|                                  | p-value               | <0.001               | <0.001               | 1    |
| > Interstitial Lung Disease      | SARS-CoV-2 Group      | 1.22                 | 1.59                 |      |
|                                  | 2020 Comparison Group | 0.29                 | 0.53                 |      |
|                                  | Risk Difference       | 0.93 (0.69 to 1.18)  | 1.06 (0.78 to 1.38)  |      |
|                                  | p-value               | <0.001               | <0.001               | 1    |
| <b>Dermatologic</b>              |                       |                      |                      |      |
| Atopic Dermatitis                | SARS-CoV-2 Group      | 0.3                  | 0.25                 |      |
|                                  | 2020 Comparison Group | 0.23                 | 0.21                 |      |
|                                  | Risk Difference       | 0.07 (-0.08 to 0.2)  | 0.04 (-0.12 to 0.22) |      |
|                                  | p-value               | 1                    | 1                    | 1    |
| Urticaria                        | SARS-CoV-2 Group      | 0.22                 | 0.15                 |      |
|                                  | 2020 Comparison Group | 0.14                 | 0.09                 |      |
|                                  | Risk Difference       | 0.08 (-0.03 to 0.21) | 0.06 (-0.03 to 0.18) |      |
|                                  | p-value               | 1                    | 1                    | 1    |
| Herpesviral Vesicular Dermatitis | SARS-CoV-2 Group      | 0.1                  | 0.09                 |      |

|                   |                       |                      |                      |      |
|-------------------|-----------------------|----------------------|----------------------|------|
|                   | 2020 Comparison Group | 0.03                 | 0.05                 |      |
|                   | Risk Difference       | 0.07 (-0.01 to 0.16) | 0.04 (-0.03 to 0.11) |      |
|                   | p-value               | 0.53                 | 1                    | 1    |
| <b>Others</b>     |                       |                      |                      |      |
| Sleep Apnea       | SARS-CoV-2 Group      | 1.91                 | 1.22                 |      |
|                   | 2020 Comparison Group | 1.16                 | 0.79                 |      |
|                   | Risk Difference       | 0.74 (0.32 to 1.13)  | 0.43 (0.14 to 0.72)  |      |
|                   | p-value               | <0.001               | <0.001               | 0.28 |
| <b>Hematology</b> |                       |                      |                      |      |
| Thrombocytopenia  | SARS-CoV-2 Group      | 0.76                 | 1.01                 |      |
|                   | 2020 Comparison Group | 0.42                 | 0.6                  |      |
|                   | Risk Difference       | 0.34 (0.13 to 0.58)  | 0.41 (0.14 to 0.65)  |      |
|                   | p-value               | <0.001               | <0.001               | 1    |
| Leukopenia        | SARS-CoV-2 Group      | 0.26                 | 0.29                 |      |
|                   | 2020 Comparison Group | 0.15                 | 0.18                 |      |
|                   | Risk Difference       | 0.11 (-0.04 to 0.28) | 0.11 (-0.01 to 0.23) |      |
|                   | p-value               | 0.85                 | 0.64                 | 1    |
| Anemia            | SARS-CoV-2 Group      | 2.52                 | 3.89                 |      |
|                   | 2020 Comparison Group | 1.51                 | 2.21                 |      |
|                   | Risk Difference       | 1.01 (0.44 to 1.42)  | 1.69 (1.12 to 2.22)  |      |
|                   | p-value               | <0.001               | <0.001               | 1    |
| <b>Symptom</b>    |                       |                      |                      |      |
| Myalgia           | SARS-CoV-2 Group      | 7.06                 | 9.34                 |      |
|                   | 2020 Comparison Group | 5.24                 | 5.89                 |      |
|                   | Risk Difference       | 1.82 (0.89 to 2.72)  | 3.45 (2.38 to 4.35)  |      |
|                   | p-value               | <0.001               | <0.001               | 1    |
| Fatigue Diagnosis | SARS-CoV-2 Group      | 8.56                 | 13.07                |      |
|                   | 2020 Comparison Group | 3.78                 | 6                    |      |



|                      |                       |                      |                      |        |
|----------------------|-----------------------|----------------------|----------------------|--------|
|                      | Risk Difference       | 4.78 (3.95 to 5.56)  | 7.07 (5.95 to 8.17)  |        |
|                      | p-value               | <0.001               | <0.001               | <0.001 |
| > Fatigue            | SARS-CoV-2 Group      | 8.4                  | 12.93                |        |
|                      | 2020 Comparison Group | 3.78                 | 5.99                 |        |
|                      | Risk Difference       | 4.61 (3.75 to 5.33)  | 6.94 (5.96 to 8)     |        |
|                      | p-value               | <0.001               | <0.001               | <0.001 |
| > Chronic Fatigue    | SARS-CoV-2 Group      | 0.38                 | 0.38                 |        |
|                      | 2020 Comparison Group | 0.25                 | 0.35                 |        |
|                      | Risk Difference       | 0.14 (-0.01 to 0.31) | 0.03 (-0.16 to 0.22) |        |
|                      | p-value               | 0.42                 | 1                    | 1      |
| > Post-viral Fatigue | SARS-CoV-2 Group      | 0.26                 | 0.26                 |        |
|                      | 2020 Comparison Group | 0.01                 | 0.02                 |        |
|                      | Risk Difference       | 0.26 (0.17 to 0.36)  | 0.24 (0.15 to 0.34)  |        |
|                      | p-value               | <0.001               | <0.001               | 1      |
| Anosmia              | SARS-CoV-2 Group      | 0.07                 | 0.04                 |        |
|                      | 2020 Comparison Group | 0.01                 | 0.02                 |        |
|                      | Risk Difference       | 0.06 (0 to 0.13)     | 0.02 (-0.03 to 0.08) |        |
|                      | p-value               | <0.001               | 1                    | 1      |

Subgroups are subpopulations of the 2020 cohort.

Cumulative incidence was obtained by Kaplan-Meier estimator at 120 days after the start of the post-acute phase (141 days after index date).

Confidence intervals were calculated based on Bonferroni correction, i.e.,  $(1 - 0.05/(N \times \text{number of subgroup levels}))$  confidence interval.

Individuals were excluded if they had less than 21 days of observation from the index date, had already been diagnosed with the outcome of interest prior to acute phase, or their matched pair was excluded for the same reasons.

Table 5b: Cumulative Incidence and Risk Difference per 100 Individuals of the SARS-CoV-2 and 2020 Comparison Group for Clinical Sequelae in the Post-Acute Phase by Race

| Clinical Sequelae               | Category              | White               | Black                 | p-interaction |
|---------------------------------|-----------------------|---------------------|-----------------------|---------------|
|                                 | Matched Group Size    | 67,027 vs 67,027    | 10,292 vs 10,292      |               |
| <b>Hypertension</b>             |                       |                     |                       |               |
| Hypertension                    | SARS-CoV-2 Group      | 11.26               | 16.74                 |               |
|                                 | 2020 Comparison Group | 7.72                | 8.81                  |               |
|                                 | Risk Difference       | 3.54 (1.3 to 5.84)  | 7.92 (-4.38 to 20.77) |               |
|                                 | p-value               | <0.001              | 1                     | 1             |
| <b>Pulmonary Hypertension</b>   |                       |                     |                       |               |
| Pulmonary Hypertension          | SARS-CoV-2 Group      | 0.99                | 1.29                  |               |
|                                 | 2020 Comparison Group | 0.64                | 0.81                  |               |
|                                 | Risk Difference       | 0.36 (0.14 to 0.63) | 0.48 (-0.05 to 1.07)  |               |
|                                 | p-value               | <0.001              | 0.11                  | 1             |
| <b>Cardiology</b>               |                       |                     |                       |               |
| <b>Cardiac Rhythm Disorders</b> |                       |                     |                       |               |
| Cardiac Rhythm Disorders        | SARS-CoV-2 Group      | 4.77                | 5.81                  |               |
|                                 | 2020 Comparison Group | 2.78                | 2.77                  |               |
|                                 | Risk Difference       | 1.98 (1.45 to 2.57) | 3.03 (1.73 to 4.41)   |               |
|                                 | p-value               | <0.001              | <0.001                | 0.04          |
| <b>&gt; Cardiac Arrhythmia</b>  |                       |                     |                       |               |
| > Cardiac Arrhythmia            | SARS-CoV-2 Group      | 2.9                 | 3.48                  |               |
|                                 | 2020 Comparison Group | 1.86                | 1.73                  |               |
|                                 | Risk Difference       | 1.04 (0.63 to 1.48) | 1.75 (0.7 to 2.73)    |               |
|                                 | p-value               | <0.001              | <0.001                | 0.69          |
| <b>&gt; Tachycardia</b>         |                       |                     |                       |               |
| > Tachycardia                   | SARS-CoV-2 Group      | 2.84                | 3.68                  |               |
|                                 | 2020 Comparison Group | 1.41                | 1.56                  |               |
|                                 | Risk Difference       | 1.43 (1.05 to 1.85) | 2.12 (1.12 to 3.26)   |               |
|                                 | p-value               | <0.001              | <0.001                | 0.06          |
| <b>&gt; POTs</b>                |                       |                     |                       |               |
| > POTs                          | SARS-CoV-2 Group      | 1.1                 | 1.73                  |               |

|                                |                       |                      |                      |     |
|--------------------------------|-----------------------|----------------------|----------------------|-----|
|                                | 2020 Comparison Group | 0.75                 | 0.76                 |     |
|                                | Risk Difference       | 0.35 (0.13 to 0.63)  | 0.97 (0.35 to 1.57)  |     |
|                                | p-value               | <0.001               | <0.001               | 0.1 |
| CHF Cardiomyopathy Myocarditis | SARS-CoV-2 Group      | 3.17                 | 3.65                 |     |
|                                | 2020 Comparison Group | 1.71                 | 1.92                 |     |
|                                | Risk Difference       | 1.46 (1.1 to 1.87)   | 1.73 (0.72 to 2.88)  |     |
|                                | p-value               | <0.001               | <0.001               | 1   |
| > Congestive Heart Failure     | SARS-CoV-2 Group      | 2.79                 | 3.4                  |     |
|                                | 2020 Comparison Group | 1.48                 | 1.8                  |     |
|                                | Risk Difference       | 1.31 (0.94 to 1.66)  | 1.6 (0.7 to 2.64)    |     |
|                                | p-value               | <0.001               | <0.001               | 1   |
| > Cardiomyopathy               | SARS-CoV-2 Group      | 1.15                 | 1.34                 |     |
|                                | 2020 Comparison Group | 0.74                 | 1.03                 |     |
|                                | Risk Difference       | 0.41 (0.18 to 0.64)  | 0.31 (-0.29 to 0.88) |     |
|                                | p-value               | <0.001               | 1                    | 1   |
| > Myocarditis                  | SARS-CoV-2 Group      | 0.03                 | 0.04                 |     |
|                                | 2020 Comparison Group | 0                    | 0                    |     |
|                                | Risk Difference       | 0.02 (-0.01 to 0.07) | 0.04 (0 to 0.15)     |     |
|                                | p-value               | 1                    | <0.001               | 1   |
| Coronary Disease               | SARS-CoV-2 Group      | 1.6                  | 1.95                 |     |
|                                | 2020 Comparison Group | 0.87                 | 0.99                 |     |
|                                | Risk Difference       | 0.73 (0.48 to 1.03)  | 0.95 (0.23 to 1.56)  |     |
|                                | p-value               | <0.001               | <0.001               | 1   |
| > Myocardial Infarction        | SARS-CoV-2 Group      | 1.32                 | 1.6                  |     |
|                                | 2020 Comparison Group | 0.68                 | 0.81                 |     |
|                                | Risk Difference       | 0.63 (0.37 to 0.87)  | 0.79 (0.23 to 1.25)  |     |

|                               |                       |                      |                     |        |
|-------------------------------|-----------------------|----------------------|---------------------|--------|
|                               | p-value               | <0.001               | <0.001              | 1      |
| > Acute Coronary Syndrome     | SARS-CoV-2 Group      | 1.6                  | 1.93                |        |
|                               | 2020 Comparison Group | 0.86                 | 0.99                |        |
|                               | Risk Difference       | 0.73 (0.47 to 0.97)  | 0.94 (0.21 to 1.65) |        |
|                               | p-value               | <0.001               | <0.001              | 1      |
| Cardiogenic Shock             | SARS-CoV-2 Group      | 0.14                 | 0.31                |        |
|                               | 2020 Comparison Group | 0.1                  | 0.07                |        |
|                               | Risk Difference       | 0.04 (-0.05 to 0.13) | 0.24 (0.03 to 0.47) |        |
|                               | p-value               | 1                    | <0.001              | 0.05   |
| Hypercoagulability DVT PE PAO | SARS-CoV-2 Group      | 3.3                  | 4.65                |        |
|                               | 2020 Comparison Group | 1.28                 | 1.62                |        |
|                               | Risk Difference       | 2.02 (1.7 to 2.34)   | 3.03 (1.95 to 4.09) |        |
|                               | p-value               | <0.001               | <0.001              | <0.001 |
| > Hypercoagulability          | SARS-CoV-2 Group      | 2.3                  | 3.29                |        |
|                               | 2020 Comparison Group | 0.98                 | 1.22                |        |
|                               | Risk Difference       | 1.31 (1.02 to 1.69)  | 2.07 (1.2 to 2.9)   |        |
|                               | p-value               | <0.001               | <0.001              | 0.002  |
| > Deep Vein Thrombosis        | SARS-CoV-2 Group      | 1.59                 | 2.49                |        |
|                               | 2020 Comparison Group | 0.56                 | 0.89                |        |
|                               | Risk Difference       | 1.03 (0.78 to 1.27)  | 1.6 (0.88 to 2.36)  |        |
|                               | p-value               | <0.001               | <0.001              | 0.05   |
| > Pulmonary Embolism          | SARS-CoV-2 Group      | 1.22                 | 1.85                |        |
|                               | 2020 Comparison Group | 0.29                 | 0.43                |        |
|                               | Risk Difference       | 0.93 (0.75 to 1.12)  | 1.42 (0.99 to 2)    |        |
|                               | p-value               | <0.001               | <0.001              | 0.004  |

|                                   |                       |                     |                      |   |
|-----------------------------------|-----------------------|---------------------|----------------------|---|
| > Peripheral Arterial Occlusions  | SARS-CoV-2 Group      | 0.38                | 0.7                  |   |
|                                   | 2020 Comparison Group | 0.22                | 0.4                  |   |
|                                   | Risk Difference       | 0.16 (0.02 to 0.3)  | 0.3 (-0.13 to 0.69)  |   |
|                                   | p-value               | <0.001              | 0.95                 | 1 |
| Stroke and Sequelae               | SARS-CoV-2 Group      | 2.21                | 2.51                 |   |
|                                   | 2020 Comparison Group | 1.31                | 1.62                 |   |
|                                   | Risk Difference       | 0.91 (0.6 to 1.28)  | 0.89 (-0.03 to 1.68) |   |
|                                   | p-value               | <0.001              | 0.32                 | 1 |
| > Ischemic Stroke and Sequelae    | SARS-CoV-2 Group      | 1.96                | 2.42                 |   |
|                                   | 2020 Comparison Group | 1.14                | 1.52                 |   |
|                                   | Risk Difference       | 0.82 (0.49 to 1.12) | 0.9 (0.15 to 1.71)   |   |
|                                   | p-value               | <0.001              | <0.001               | 1 |
| > Hemorrhagic Stroke and Sequelae | SARS-CoV-2 Group      | 1.34                | 1.47                 |   |
|                                   | 2020 Comparison Group | 0.68                | 0.93                 |   |
|                                   | Risk Difference       | 0.66 (0.43 to 0.96) | 0.53 (-0.08 to 1.25) |   |
|                                   | p-value               | <0.001              | 0.32                 | 1 |
| <b>Mental Health</b>              |                       |                     |                      |   |
| Mental Health Diagnosis           | SARS-CoV-2 Group      | 6.28                | 3.99                 |   |
|                                   | 2020 Comparison Group | 3.47                | 2.33                 |   |
|                                   | Risk Difference       | 2.81 (2.11 to 3.49) | 1.66 (0.41 to 2.89)  |   |
|                                   | p-value               | <0.001              | <0.001               | 1 |
| Psychosis                         | SARS-CoV-2 Group      | 0.36                | 0.27                 |   |
|                                   | 2020 Comparison Group | 0.13                | 0.17                 |   |
|                                   | Risk Difference       | 0.23 (0.12 to 0.34) | 0.1 (-0.11 to 0.36)  |   |
|                                   | p-value               | <0.001              | 1                    | 1 |

|                           |                       |                      |                      |        |
|---------------------------|-----------------------|----------------------|----------------------|--------|
| <b>Neurologic</b>         |                       |                      |                      |        |
| Amnesia/Memory Difficulty | SARS-CoV-2 Group      | 5.1                  | 5.72                 |        |
|                           | 2020 Comparison Group | 2.53                 | 2.32                 |        |
|                           | Risk Difference       | 2.57 (2.06 to 3.01)  | 3.41 (2.23 to 4.73)  |        |
|                           | p-value               | <0.001               | <0.001               | 0.12   |
| Migraine                  | SARS-CoV-2 Group      | 0.35                 | 0.19                 |        |
|                           | 2020 Comparison Group | 0.32                 | 0.12                 |        |
|                           | Risk Difference       | 0.02 (-0.12 to 0.18) | 0.06 (-0.15 to 0.27) |        |
|                           | p-value               | 1                    | 1                    | 1      |
| Peripheral Neuropathy     | SARS-CoV-2 Group      | 1                    | 0.92                 |        |
|                           | 2020 Comparison Group | 0.72                 | 0.73                 |        |
|                           | Risk Difference       | 0.29 (0.02 to 0.49)  | 0.19 (-0.35 to 0.65) |        |
|                           | p-value               | <0.001               | 1                    | 1      |
| Encephalopathy            | SARS-CoV-2 Group      | 2.72                 | 3.95                 |        |
|                           | 2020 Comparison Group | 0.96                 | 1.05                 |        |
|                           | Risk Difference       | 1.76 (1.47 to 2.05)  | 2.9 (2 to 3.83)      |        |
|                           | p-value               | <0.001               | <0.001               | <0.001 |
| Seizure                   | SARS-CoV-2 Group      | 0.49                 | 0.8                  |        |
|                           | 2020 Comparison Group | 0.26                 | 0.45                 |        |
|                           | Risk Difference       | 0.23 (0.08 to 0.39)  | 0.35 (-0.04 to 0.8)  |        |
|                           | p-value               | <0.001               | 0.42                 | 1      |
| Dementia                  | SARS-CoV-2 Group      | 2.66                 | 2.83                 |        |
|                           | 2020 Comparison Group | 1.21                 | 1.09                 |        |
|                           | Risk Difference       | 1.45 (1.08 to 1.75)  | 1.74 (0.87 to 2.56)  |        |
|                           | p-value               | <0.001               | <0.001               | 1      |
| Guillain-Barre Syndrome   | SARS-CoV-2 Group      | 0.01                 | 0.04                 |        |

|                          |                       |                      |                      |        |
|--------------------------|-----------------------|----------------------|----------------------|--------|
|                          | 2020 Comparison Group | 0.01                 | 0.02                 |        |
|                          | Risk Difference       | 0.01 (-0.01 to 0.03) | 0.02 (-0.06 to 0.11) |        |
|                          | p-value               | 1                    | 1                    | 1      |
| <b>Diabetes</b>          |                       |                      |                      |        |
| Type 2 Diabetes          | SARS-CoV-2 Group      | 2.54                 | 4.94                 |        |
|                          | 2020 Comparison Group | 1.18                 | 1.76                 |        |
|                          | Risk Difference       | 1.36 (0.87 to 1.84)  | 3.19 (0.94 to 5.48)  |        |
|                          | p-value               | <0.001               | <0.001               | 0.07   |
| <b>Liver</b>             |                       |                      |                      |        |
| Liver Test Abnormality   | SARS-CoV-2 Group      | 1.71                 | 1.89                 |        |
|                          | 2020 Comparison Group | 1.12                 | 1.44                 |        |
|                          | Risk Difference       | 0.58 (0.27 to 0.88)  | 0.44 (-0.43 to 1.34) |        |
|                          | p-value               | <0.001               | 1                    | 1      |
| <b>Nephrology</b>        |                       |                      |                      |        |
| Kidney Injury            | SARS-CoV-2 Group      | 6.14                 | 8.96                 |        |
|                          | 2020 Comparison Group | 3.6                  | 4.81                 |        |
|                          | Risk Difference       | 2.53 (1.81 to 3.2)   | 4.15 (2.3 to 6.29)   |        |
|                          | p-value               | <0.001               | <0.001               | 0.05   |
| > Chronic Kidney Disease | SARS-CoV-2 Group      | 4.13                 | 5.79                 |        |
|                          | 2020 Comparison Group | 2.96                 | 4.07                 |        |
|                          | Risk Difference       | 1.16 (0.64 to 1.68)  | 1.72 (0.11 to 3.49)  |        |
|                          | p-value               | <0.001               | <0.001               | 1      |
| > Acute Kidney Injury    | SARS-CoV-2 Group      | 4.16                 | 7.17                 |        |
|                          | 2020 Comparison Group | 1.81                 | 2.61                 |        |
|                          | Risk Difference       | 2.35 (1.98 to 2.83)  | 4.56 (3.48 to 5.73)  |        |
|                          | p-value               | <0.001               | <0.001               | <0.001 |
| <b>Respiratory</b>       |                       |                      |                      |        |
| Respiratory Failure      | SARS-CoV-2 Group      | 8.51                 | 10.18                |        |

|                                  |                       |                      |                       |        |
|----------------------------------|-----------------------|----------------------|-----------------------|--------|
|                                  | 2020 Comparison Group | 1.66                 | 1.65                  |        |
|                                  | Risk Difference       | 6.86 (6.4 to 7.35)   | 8.53 (7.33 to 9.58)   |        |
|                                  | p-value               | <0.001               | <0.001                | <0.001 |
| > Acute Respiratory Failure      | SARS-CoV-2 Group      | 7.56                 | 9.53                  |        |
|                                  | 2020 Comparison Group | 1.18                 | 1.33                  |        |
|                                  | Risk Difference       | 6.38 (5.98 to 6.81)  | 8.21 (7.14 to 9.19)   |        |
|                                  | p-value               | <0.001               | <0.001                | <0.001 |
| > Chronic Respiratory Failure    | SARS-CoV-2 Group      | 1.35                 | 1.47                  |        |
|                                  | 2020 Comparison Group | 0.4                  | 0.38                  |        |
|                                  | Risk Difference       | 0.95 (0.74 to 1.16)  | 1.09 (0.51 to 1.59)   |        |
|                                  | p-value               | <0.001               | <0.001                | 1      |
| > Interstitial Lung Disease      | SARS-CoV-2 Group      | 1.35                 | 1.4                   |        |
|                                  | 2020 Comparison Group | 0.45                 | 0.41                  |        |
|                                  | Risk Difference       | 0.9 (0.67 to 1.15)   | 0.99 (0.52 to 1.49)   |        |
|                                  | p-value               | <0.001               | <0.001                | 1      |
| <b>Dermatologic</b>              |                       |                      |                       |        |
| Atopic Dermatitis                | SARS-CoV-2 Group      | 0.27                 | 0.26                  |        |
|                                  | 2020 Comparison Group | 0.21                 | 0.3                   |        |
|                                  | Risk Difference       | 0.06 (-0.08 to 0.18) | -0.04 (-0.35 to 0.19) |        |
|                                  | p-value               | 1                    | 1                     | 1      |
| Urticaria                        | SARS-CoV-2 Group      | 0.2                  | 0.22                  |        |
|                                  | 2020 Comparison Group | 0.15                 | 0.19                  |        |
|                                  | Risk Difference       | 0.05 (-0.05 to 0.18) | 0.03 (-0.19 to 0.26)  |        |
|                                  | p-value               | 1                    | 1                     | 1      |
| Herpesviral Vesicular Dermatitis | SARS-CoV-2 Group      | 0.12                 | 0.03                  |        |



|                   |                       |                     |                      |   |
|-------------------|-----------------------|---------------------|----------------------|---|
|                   | 2020 Comparison Group | 0.05                | 0.01                 |   |
|                   | Risk Difference       | 0.07 (0 to 0.16)    | 0.02 (-0.05 to 0.11) |   |
|                   | p-value               | 0.11                | 1                    | 1 |
| <b>Others</b>     |                       |                     |                      |   |
| Sleep Apnea       | SARS-CoV-2 Group      | 1.61                | 1.48                 |   |
|                   | 2020 Comparison Group | 1.01                | 1.24                 |   |
|                   | Risk Difference       | 0.6 (0.3 to 0.91)   | 0.24 (-0.44 to 0.92) |   |
|                   | p-value               | <0.001              | 1                    | 1 |
| <b>Hematology</b> |                       |                     |                      |   |
| Thrombocytopenia  | SARS-CoV-2 Group      | 0.86                | 0.86                 |   |
|                   | 2020 Comparison Group | 0.51                | 0.67                 |   |
|                   | Risk Difference       | 0.36 (0.18 to 0.56) | 0.18 (-0.34 to 0.64) |   |
|                   | p-value               | <0.001              | 1                    | 1 |
| Leukopenia        | SARS-CoV-2 Group      | 0.3                 | 0.35                 |   |
|                   | 2020 Comparison Group | 0.16                | 0.2                  |   |
|                   | Risk Difference       | 0.14 (0.04 to 0.27) | 0.15 (-0.14 to 0.4)  |   |
|                   | p-value               | <0.001              | 1                    | 1 |
| Anemia            | SARS-CoV-2 Group      | 3.17                | 4.4                  |   |
|                   | 2020 Comparison Group | 1.88                | 2.76                 |   |
|                   | Risk Difference       | 1.29 (0.9 to 1.77)  | 1.63 (0.51 to 2.69)  |   |
|                   | p-value               | <0.001              | <0.001               | 1 |
| <b>Symptom</b>    |                       |                     |                      |   |
| Myalgia           | SARS-CoV-2 Group      | 8.05                | 8.87                 |   |
|                   | 2020 Comparison Group | 5.86                | 6.33                 |   |
|                   | Risk Difference       | 2.2 (1.37 to 2.98)  | 2.54 (0.9 to 4.24)   |   |
|                   | p-value               | <0.001              | <0.001               | 1 |
| Fatigue Diagnosis | SARS-CoV-2 Group      | 10.7                | 11.8                 |   |
|                   | 2020 Comparison Group | 5.11                | 4.8                  |   |

|                      |                       |                     |                      |      |
|----------------------|-----------------------|---------------------|----------------------|------|
|                      | Risk Difference       | 5.59 (4.69 to 6.24) | 7 (5.36 to 9.07)     |      |
|                      | p-value               | <0.001              | <0.001               | 0.14 |
| > Fatigue            | SARS-CoV-2 Group      | 10.52               | 11.56                |      |
|                      | 2020 Comparison Group | 5.1                 | 4.78                 |      |
|                      | Risk Difference       | 5.42 (4.66 to 6.33) | 6.78 (4.98 to 8.49)  |      |
|                      | p-value               | <0.001              | <0.001               | 0.2  |
| > Chronic Fatigue    | SARS-CoV-2 Group      | 0.38                | 0.31                 |      |
|                      | 2020 Comparison Group | 0.28                | 0.29                 |      |
|                      | Risk Difference       | 0.1 (-0.05 to 0.23) | 0.02 (-0.27 to 0.28) |      |
|                      | p-value               | 0.64                | 1                    | 1    |
| > Post-viral Fatigue | SARS-CoV-2 Group      | 0.26                | 0.27                 |      |
|                      | 2020 Comparison Group | 0.01                | 0.03                 |      |
|                      | Risk Difference       | 0.25 (0.16 to 0.34) | 0.24 (0.05 to 0.46)  |      |
|                      | p-value               | <0.001              | <0.001               | 1    |
| Anosmia              | SARS-CoV-2 Group      | 0.07                | 0.07                 |      |
|                      | 2020 Comparison Group | 0.02                | 0                    |      |
|                      | Risk Difference       | 0.05 (0 to 0.1)     | 0.07 (0 to 0.21)     |      |
|                      | p-value               | 0.11                | <0.001               | 1    |

Subgroups are subpopulations of the 2020 cohort.

Cumulative incidence was obtained by Kaplan-Meier estimator at 120 days after the start of the post-acute phase (141 days after index date).

Confidence intervals were calculated based on Bonferroni correction, i.e.,  $(1 - 0.05/(N \times \text{number of subgroup levels}))$  confidence interval.

Individuals were excluded if they had less than 21 days of observation from the index date, had already been diagnosed with the outcome of interest prior to acute phase, or their matched pair was excluded for the same reasons.

Table 5c: Cumulative Incidence and Risk Difference per 100 Individuals of the SARS-CoV-2 and 2020 Comparison Group for Clinical Sequelae in the Post-Acute Phase by Gender

| Clinical Sequelae               | Category              | Female              | Male                | p-interaction |
|---------------------------------|-----------------------|---------------------|---------------------|---------------|
|                                 | Matched Group Size    | 49,054 vs 49,054    | 37,503 vs 37,503    |               |
| <b>Hypertension</b>             |                       |                     |                     |               |
| Hypertension                    | SARS-CoV-2 Group      | 10.03               | 12.92               |               |
|                                 | 2020 Comparison Group | 6.36                | 6.34                |               |
|                                 | Risk Difference       | 3.67 (0.89 to 6.38) | 6.58 (3.03 to 9.5)  |               |
|                                 | p-value               | <0.001              | <0.001              | 1             |
| <b>Pulmonary Hypertension</b>   |                       |                     |                     |               |
| Pulmonary Hypertension          | SARS-CoV-2 Group      | 0.98                | 0.95                |               |
|                                 | 2020 Comparison Group | 0.62                | 0.61                |               |
|                                 | Risk Difference       | 0.36 (0.11 to 0.62) | 0.34 (0.04 to 0.62) |               |
|                                 | p-value               | <0.001              | <0.001              | 1             |
| <b>Cardiology</b>               |                       |                     |                     |               |
| <b>Cardiac Rhythm Disorders</b> |                       |                     |                     |               |
| Cardiac Rhythm Disorders        | SARS-CoV-2 Group      | 4.23                | 5.63                |               |
|                                 | 2020 Comparison Group | 2.38                | 2.6                 |               |
|                                 | Risk Difference       | 1.84 (1.32 to 2.35) | 3.02 (2.43 to 3.73) |               |
|                                 | p-value               | <0.001              | <0.001              | 0.002         |
| <b>&gt; Cardiac Arrhythmia</b>  |                       |                     |                     |               |
| > Cardiac Arrhythmia            | SARS-CoV-2 Group      | 2.43                | 3.41                |               |
|                                 | 2020 Comparison Group | 1.45                | 1.83                |               |
|                                 | Risk Difference       | 0.98 (0.57 to 1.33) | 1.58 (1.01 to 2.09) |               |
|                                 | p-value               | <0.001              | <0.001              | 0.15          |
| <b>&gt; Tachycardia</b>         |                       |                     |                     |               |
| > Tachycardia                   | SARS-CoV-2 Group      | 2.55                | 3.5                 |               |
|                                 | 2020 Comparison Group | 1.3                 | 1.35                |               |
|                                 | Risk Difference       | 1.25 (0.81 to 1.57) | 2.16 (1.62 to 2.62) |               |
|                                 | p-value               | <0.001              | <0.001              | 0.02          |
| <b>&gt; POTs</b>                |                       |                     |                     |               |
| > POTs                          | SARS-CoV-2 Group      | 0.95                | 1.33                |               |

|                                |                       |                      |                     |      |
|--------------------------------|-----------------------|----------------------|---------------------|------|
|                                | 2020 Comparison Group | 0.58                 | 0.81                |      |
|                                | Risk Difference       | 0.37 (0.13 to 0.61)  | 0.53 (0.22 to 0.84) |      |
|                                | p-value               | <0.001               | <0.001              | 1    |
| CHF Cardiomyopathy Myocarditis | SARS-CoV-2 Group      | 2.79                 | 3.66                |      |
|                                | 2020 Comparison Group | 1.41                 | 1.98                |      |
|                                | Risk Difference       | 1.38 (0.81 to 1.81)  | 1.68 (1.02 to 2.21) |      |
|                                | p-value               | <0.001               | <0.001              | 1    |
| > Congestive Heart Failure     | SARS-CoV-2 Group      | 2.46                 | 3.17                |      |
|                                | 2020 Comparison Group | 1.31                 | 1.7                 |      |
|                                | Risk Difference       | 1.15 (0.8 to 1.52)   | 1.47 (0.95 to 2.09) |      |
|                                | p-value               | <0.001               | <0.001              | 1    |
| > Cardiomyopathy               | SARS-CoV-2 Group      | 0.9                  | 1.48                |      |
|                                | 2020 Comparison Group | 0.45                 | 1.06                |      |
|                                | Risk Difference       | 0.45 (0.23 to 0.67)  | 0.42 (0.04 to 0.8)  |      |
|                                | p-value               | <0.001               | <0.001              | 1    |
| > Myocarditis                  | SARS-CoV-2 Group      | 0.05                 | 0.03                |      |
|                                | 2020 Comparison Group | 0.01                 | 0                   |      |
|                                | Risk Difference       | 0.03 (-0.02 to 0.09) | 0.03 (0 to 0.07)    |      |
|                                | p-value               | 1                    | 0.21                | 1    |
| Coronary Disease               | SARS-CoV-2 Group      | 1.39                 | 1.94                |      |
|                                | 2020 Comparison Group | 0.8                  | 0.86                |      |
|                                | Risk Difference       | 0.58 (0.3 to 0.88)   | 1.08 (0.72 to 1.45) |      |
|                                | p-value               | <0.001               | <0.001              | 0.01 |
| > Myocardial Infarction        | SARS-CoV-2 Group      | 1.17                 | 1.56                |      |
|                                | 2020 Comparison Group | 0.63                 | 0.7                 |      |
|                                | Risk Difference       | 0.53 (0.34 to 0.82)  | 0.86 (0.55 to 1.18) |      |

|                               |                       |                     |                      |        |
|-------------------------------|-----------------------|---------------------|----------------------|--------|
|                               | p-value               | <0.001              | <0.001               | 0.08   |
| > Acute Coronary Syndrome     | SARS-CoV-2 Group      | 1.38                | 1.93                 |        |
|                               | 2020 Comparison Group | 0.8                 | 0.86                 |        |
|                               | Risk Difference       | 0.58 (0.29 to 0.85) | 1.07 (0.74 to 1.44)  |        |
|                               | p-value               | <0.001              | <0.001               | 0.01   |
| Cardiogenic Shock             | SARS-CoV-2 Group      | 0.09                | 0.18                 |        |
|                               | 2020 Comparison Group | 0.08                | 0.1                  |        |
|                               | Risk Difference       | 0.01 (-0.08 to 0.1) | 0.08 (-0.04 to 0.19) |        |
|                               | p-value               | 1                   | 1                    | 1      |
| Hypercoagulability DVT PE PAO | SARS-CoV-2 Group      | 3.11                | 3.89                 |        |
|                               | 2020 Comparison Group | 1.03                | 1.31                 |        |
|                               | Risk Difference       | 2.08 (1.63 to 2.5)  | 2.59 (2.09 to 3.15)  |        |
|                               | p-value               | <0.001              | <0.001               | 0.04   |
| > Hypercoagulability          | SARS-CoV-2 Group      | 2.29                | 2.53                 |        |
|                               | 2020 Comparison Group | 0.82                | 0.98                 |        |
|                               | Risk Difference       | 1.47 (1.15 to 1.79) | 1.55 (1.17 to 1.97)  |        |
|                               | p-value               | <0.001              | <0.001               | 1      |
| > Deep Vein Thrombosis        | SARS-CoV-2 Group      | 1.65                | 1.71                 |        |
|                               | 2020 Comparison Group | 0.47                | 0.51                 |        |
|                               | Risk Difference       | 1.18 (0.89 to 1.44) | 1.2 (0.85 to 1.46)   |        |
|                               | p-value               | <0.001              | <0.001               | 1      |
| > Pulmonary Embolism          | SARS-CoV-2 Group      | 1.07                | 1.5                  |        |
|                               | 2020 Comparison Group | 0.28                | 0.3                  |        |
|                               | Risk Difference       | 0.79 (0.58 to 1)    | 1.21 (0.92 to 1.45)  |        |
|                               | p-value               | <0.001              | <0.001               | <0.001 |

|                                   |                       |                      |                     |      |
|-----------------------------------|-----------------------|----------------------|---------------------|------|
| > Peripheral Arterial Occlusions  | SARS-CoV-2 Group      | 0.29                 | 0.59                |      |
|                                   | 2020 Comparison Group | 0.18                 | 0.27                |      |
|                                   | Risk Difference       | 0.11 (-0.02 to 0.25) | 0.32 (0.11 to 0.55) |      |
|                                   | p-value               | 0.21                 | <0.001              | 0.12 |
| Stroke and Sequelae               | SARS-CoV-2 Group      | 2.11                 | 2.33                |      |
|                                   | 2020 Comparison Group | 1.13                 | 1.35                |      |
|                                   | Risk Difference       | 0.98 (0.64 to 1.36)  | 0.98 (0.59 to 1.46) |      |
|                                   | p-value               | <0.001               | <0.001              | 1    |
| > Ischemic Stroke and Sequelae    | SARS-CoV-2 Group      | 1.88                 | 2.08                |      |
|                                   | 2020 Comparison Group | 0.98                 | 1.16                |      |
|                                   | Risk Difference       | 0.9 (0.58 to 1.23)   | 0.92 (0.51 to 1.29) |      |
|                                   | p-value               | <0.001               | <0.001              | 1    |
| > Hemorrhagic Stroke and Sequelae | SARS-CoV-2 Group      | 1.26                 | 1.4                 |      |
|                                   | 2020 Comparison Group | 0.61                 | 0.74                |      |
|                                   | Risk Difference       | 0.65 (0.35 to 0.91)  | 0.66 (0.36 to 1.01) |      |
|                                   | p-value               | <0.001               | <0.001              | 1    |
| <b>Mental Health</b>              |                       |                      |                     |      |
| Mental Health Diagnosis           | SARS-CoV-2 Group      | 6.8                  | 4.06                |      |
|                                   | 2020 Comparison Group | 4.37                 | 2.5                 |      |
|                                   | Risk Difference       | 2.43 (1.58 to 3.26)  | 1.55 (0.87 to 2.15) |      |
|                                   | p-value               | <0.001               | <0.001              | 0.21 |
| Psychosis                         | SARS-CoV-2 Group      | 0.35                 | 0.28                |      |
|                                   | 2020 Comparison Group | 0.15                 | 0.07                |      |
|                                   | Risk Difference       | 0.19 (0.08 to 0.33)  | 0.2 (0.09 to 0.35)  |      |
|                                   | p-value               | <0.001               | <0.001              | 1    |

|                           |                       |                      |                      |      |
|---------------------------|-----------------------|----------------------|----------------------|------|
| <b>Neurologic</b>         |                       |                      |                      |      |
| Amnesia/Memory Difficulty | SARS-CoV-2 Group      | 5.05                 | 4.91                 |      |
|                           | 2020 Comparison Group | 2.4                  | 2.19                 |      |
|                           | Risk Difference       | 2.65 (2.12 to 3.18)  | 2.72 (2.09 to 3.39)  |      |
|                           | p-value               | <0.001               | <0.001               | 1    |
| Migraine                  | SARS-CoV-2 Group      | 0.38                 | 0.2                  |      |
|                           | 2020 Comparison Group | 0.31                 | 0.15                 |      |
|                           | Risk Difference       | 0.07 (-0.09 to 0.23) | 0.05 (-0.08 to 0.21) |      |
|                           | p-value               | 1                    | 1                    | 1    |
| Peripheral Neuropathy     | SARS-CoV-2 Group      | 0.9                  | 0.93                 |      |
|                           | 2020 Comparison Group | 0.68                 | 0.78                 |      |
|                           | Risk Difference       | 0.23 (-0.02 to 0.47) | 0.15 (-0.13 to 0.46) |      |
|                           | p-value               | 0.21                 | 1                    | 1    |
| Encephalopathy            | SARS-CoV-2 Group      | 2.55                 | 2.88                 |      |
|                           | 2020 Comparison Group | 0.88                 | 0.81                 |      |
|                           | Risk Difference       | 1.67 (1.32 to 2.01)  | 2.07 (1.64 to 2.47)  |      |
|                           | p-value               | <0.001               | <0.001               | 0.23 |
| Seizure                   | SARS-CoV-2 Group      | 0.51                 | 0.55                 |      |
|                           | 2020 Comparison Group | 0.29                 | 0.25                 |      |
|                           | Risk Difference       | 0.22 (0.06 to 0.37)  | 0.3 (0.11 to 0.52)   |      |
|                           | p-value               | <0.001               | <0.001               | 1    |
| Dementia                  | SARS-CoV-2 Group      | 2.8                  | 2.28                 |      |
|                           | 2020 Comparison Group | 1.33                 | 1.1                  |      |
|                           | Risk Difference       | 1.47 (1.07 to 1.89)  | 1.18 (0.81 to 1.58)  |      |
|                           | p-value               | <0.001               | <0.001               | 1    |
| Guillain-Barre Syndrome   | SARS-CoV-2 Group      | 0.02                 | 0.03                 |      |

|                          |                       |                      |                     |        |
|--------------------------|-----------------------|----------------------|---------------------|--------|
|                          | 2020 Comparison Group | 0.01                 | 0                   |        |
|                          | Risk Difference       | 0.01 (-0.02 to 0.04) | 0.03 (0 to 0.07)    |        |
|                          | p-value               | 1                    | <0.001              | 1      |
| <b>Diabetes</b>          |                       |                      |                     |        |
| Type 2 Diabetes          | SARS-CoV-2 Group      | 2.58                 | 3.66                |        |
|                          | 2020 Comparison Group | 1.38                 | 1.69                |        |
|                          | Risk Difference       | 1.21 (0.62 to 1.73)  | 1.97 (1.19 to 2.86) |        |
|                          | p-value               | <0.001               | <0.001              | 1      |
| <b>Liver</b>             |                       |                      |                     |        |
| Liver Test Abnormality   | SARS-CoV-2 Group      | 1.76                 | 2.03                |        |
|                          | 2020 Comparison Group | 1.2                  | 1.37                |        |
|                          | Risk Difference       | 0.56 (0.15 to 0.9)   | 0.66 (0.27 to 1.09) |        |
|                          | p-value               | <0.001               | <0.001              | 1      |
| <b>Nephrology</b>        |                       |                      |                     |        |
| Kidney Injury            | SARS-CoV-2 Group      | 5.98                 | 7.15                |        |
|                          | 2020 Comparison Group | 3.51                 | 3.89                |        |
|                          | Risk Difference       | 2.47 (1.78 to 3.23)  | 3.25 (2.24 to 4.08) |        |
|                          | p-value               | <0.001               | <0.001              | 0.04   |
| > Chronic Kidney Disease | SARS-CoV-2 Group      | 4.1                  | 4.64                |        |
|                          | 2020 Comparison Group | 2.82                 | 3.22                |        |
|                          | Risk Difference       | 1.28 (0.64 to 1.92)  | 1.42 (0.59 to 2.28) |        |
|                          | p-value               | <0.001               | <0.001              | 1      |
| > Acute Kidney Injury    | SARS-CoV-2 Group      | 3.76                 | 5.55                |        |
|                          | 2020 Comparison Group | 1.61                 | 2.11                |        |
|                          | Risk Difference       | 2.15 (1.68 to 2.59)  | 3.44 (2.88 to 4.09) |        |
|                          | p-value               | <0.001               | <0.001              | <0.001 |
| <b>Respiratory</b>       |                       |                      |                     |        |
| Respiratory Failure      | SARS-CoV-2 Group      | 7.57                 | 10.81               |        |



|                                  |                       |                       |                       |        |
|----------------------------------|-----------------------|-----------------------|-----------------------|--------|
|                                  | 2020 Comparison Group | 1.42                  | 1.57                  |        |
|                                  | Risk Difference       | 6.15 (5.59 to 6.71)   | 9.24 (8.47 to 9.89)   |        |
|                                  | p-value               | <0.001                | <0.001                | <0.001 |
| > Acute Respiratory Failure      | SARS-CoV-2 Group      | 6.72                  | 9.52                  |        |
|                                  | 2020 Comparison Group | 0.95                  | 1.14                  |        |
|                                  | Risk Difference       | 5.77 (5.27 to 6.17)   | 8.38 (7.81 to 8.92)   |        |
|                                  | p-value               | <0.001                | <0.001                | <0.001 |
| > Chronic Respiratory Failure    | SARS-CoV-2 Group      | 1.28                  | 1.48                  |        |
|                                  | 2020 Comparison Group | 0.32                  | 0.35                  |        |
|                                  | Risk Difference       | 0.97 (0.75 to 1.22)   | 1.12 (0.85 to 1.41)   |        |
|                                  | p-value               | <0.001                | <0.001                | 1      |
| > Interstitial Lung Disease      | SARS-CoV-2 Group      | 1.15                  | 1.68                  |        |
|                                  | 2020 Comparison Group | 0.52                  | 0.48                  |        |
|                                  | Risk Difference       | 0.64 (0.39 to 0.91)   | 1.2 (0.88 to 1.53)    |        |
|                                  | p-value               | <0.001                | <0.001                | <0.001 |
| <b>Dermatologic</b>              |                       |                       |                       |        |
| Atopic Dermatitis                | SARS-CoV-2 Group      | 0.25                  | 0.26                  |        |
|                                  | 2020 Comparison Group | 0.29                  | 0.27                  |        |
|                                  | Risk Difference       | -0.04 (-0.19 to 0.09) | -0.02 (-0.19 to 0.14) |        |
|                                  | p-value               | 1                     | 1                     | 1      |
| Urticaria                        | SARS-CoV-2 Group      | 0.21                  | 0.15                  |        |
|                                  | 2020 Comparison Group | 0.15                  | 0.13                  |        |
|                                  | Risk Difference       | 0.06 (-0.07 to 0.16)  | 0.02 (-0.09 to 0.15)  |        |
|                                  | p-value               | 1                     | 1                     | 1      |
| Herpesviral Vesicular Dermatitis | SARS-CoV-2 Group      | 0.1                   | 0.09                  |        |

|                   |                       |                      |                      |      |
|-------------------|-----------------------|----------------------|----------------------|------|
|                   | 2020 Comparison Group | 0.05                 | 0.02                 |      |
|                   | Risk Difference       | 0.05 (-0.03 to 0.12) | 0.07 (-0.02 to 0.15) |      |
|                   | p-value               | 1                    | 0.21                 | 1    |
| <b>Others</b>     |                       |                      |                      |      |
| Sleep Apnea       | SARS-CoV-2 Group      | 1.18                 | 2.12                 |      |
|                   | 2020 Comparison Group | 0.8                  | 1.19                 |      |
|                   | Risk Difference       | 0.38 (0.07 to 0.63)  | 0.92 (0.45 to 1.32)  |      |
|                   | p-value               | <0.001               | <0.001               | 0.86 |
| <b>Hematology</b> |                       |                      |                      |      |
| Thrombocytopenia  | SARS-CoV-2 Group      | 0.65                 | 1.32                 |      |
|                   | 2020 Comparison Group | 0.43                 | 0.74                 |      |
|                   | Risk Difference       | 0.23 (0.05 to 0.43)  | 0.58 (0.33 to 0.91)  |      |
|                   | p-value               | <0.001               | <0.001               | 0.56 |
| Leukopenia        | SARS-CoV-2 Group      | 0.27                 | 0.28                 |      |
|                   | 2020 Comparison Group | 0.16                 | 0.13                 |      |
|                   | Risk Difference       | 0.11 (0 to 0.22)     | 0.15 (0.02 to 0.3)   |      |
|                   | p-value               | <0.001               | <0.001               | 1    |
| Anemia            | SARS-CoV-2 Group      | 3.25                 | 3.1                  |      |
|                   | 2020 Comparison Group | 1.96                 | 1.94                 |      |
|                   | Risk Difference       | 1.29 (0.83 to 1.79)  | 1.17 (0.61 to 1.81)  |      |
|                   | p-value               | <0.001               | <0.001               | 1    |
| <b>Symptom</b>    |                       |                      |                      |      |
| Myalgia           | SARS-CoV-2 Group      | 8.63                 | 7.04                 |      |
|                   | 2020 Comparison Group | 6.23                 | 5.05                 |      |
|                   | Risk Difference       | 2.4 (1.31 to 3.48)   | 1.98 (1.17 to 3.09)  |      |
|                   | p-value               | <0.001               | <0.001               | 1    |
| Fatigue Diagnosis | SARS-CoV-2 Group      | 10.98                | 10.37                |      |
|                   | 2020 Comparison Group | 5.07                 | 4.29                 |      |

|                      |                       |                      |                      |   |
|----------------------|-----------------------|----------------------|----------------------|---|
|                      | Risk Difference       | 5.91 (5.03 to 6.8)   | 6.08 (5.23 to 7.15)  |   |
|                      | p-value               | <0.001               | <0.001               | 1 |
| > Fatigue            | SARS-CoV-2 Group      | 10.81                | 10.24                |   |
|                      | 2020 Comparison Group | 5.08                 | 4.29                 |   |
|                      | Risk Difference       | 5.73 (4.82 to 6.62)  | 5.95 (5.18 to 6.89)  |   |
|                      | p-value               | <0.001               | <0.001               | 1 |
| > Chronic Fatigue    | SARS-CoV-2 Group      | 0.42                 | 0.31                 |   |
|                      | 2020 Comparison Group | 0.32                 | 0.22                 |   |
|                      | Risk Difference       | 0.1 (-0.08 to 0.3)   | 0.09 (-0.07 to 0.27) |   |
|                      | p-value               | 1                    | 1                    | 1 |
| > Post-viral Fatigue | SARS-CoV-2 Group      | 0.29                 | 0.2                  |   |
|                      | 2020 Comparison Group | 0.02                 | 0.01                 |   |
|                      | Risk Difference       | 0.27 (0.18 to 0.36)  | 0.19 (0.1 to 0.31)   |   |
|                      | p-value               | <0.001               | <0.001               | 1 |
| Anosmia              | SARS-CoV-2 Group      | 0.07                 | 0.06                 |   |
|                      | 2020 Comparison Group | 0.04                 | 0.03                 |   |
|                      | Risk Difference       | 0.03 (-0.03 to 0.11) | 0.03 (-0.04 to 0.12) |   |
|                      | p-value               | 1                    | 1                    | 1 |

Subgroups are subpopulations of the 2020 cohort.

Cumulative incidence was obtained by Kaplan-Meier estimator at 120 days after the start of the post-acute phase (141 days after index date).

Confidence intervals were calculated based on Bonferroni correction, i.e.,  $(1 - 0.05/(N \times \text{number of subgroup levels}))$  confidence interval.

Individuals were excluded if they had less than 21 days of observation from the index date, had already been diagnosed with the outcome of interest prior to acute phase, or their matched pair was excluded for the same reasons.

Table 5d: Cumulative Incidence and Risk Difference per 100 Individuals of the SARS-CoV-2 and 2020 Comparison Group for Clinical Sequelae in the Post-Acute Phase by COVID Hospitalization

| Clinical Sequelae               | Category              | Not hospitalized with COVID | Hospitalized with COVID | p-interaction |
|---------------------------------|-----------------------|-----------------------------|-------------------------|---------------|
|                                 | Matched Group Size    | 63,690 vs 63,690            | 23,486 vs 23,486        |               |
| <b>Hypertension</b>             |                       |                             |                         |               |
| Hypertension                    | SARS-CoV-2 Group      | 9.34                        | 22.89                   |               |
|                                 | 2020 Comparison Group | 6.78                        | 8.25                    |               |
|                                 | Risk Difference       | 2.55 (0.05 to 5.06)         | 14.64 (7.13 to 21.3)    |               |
|                                 | p-value               | 0.11                        | <0.001                  | <0.001        |
| <b>Pulmonary Hypertension</b>   |                       |                             |                         |               |
| Pulmonary Hypertension          | SARS-CoV-2 Group      | 0.79                        | 1.74                    |               |
|                                 | 2020 Comparison Group | 0.54                        | 0.74                    |               |
|                                 | Risk Difference       | 0.26 (0.07 to 0.49)         | 1.01 (0.52 to 1.42)     |               |
|                                 | p-value               | <0.001                      | <0.001                  | 1             |
| <b>Cardiology</b>               |                       |                             |                         |               |
| <b>Cardiac Rhythm Disorders</b> |                       |                             |                         |               |
| Cardiac Rhythm Disorders        | SARS-CoV-2 Group      | 3.48                        | 9.61                    |               |
|                                 | 2020 Comparison Group | 2.5                         | 2.9                     |               |
|                                 | Risk Difference       | 0.98 (0.57 to 1.4)          | 6.71 (5.61 to 7.82)     |               |
|                                 | p-value               | <0.001                      | <0.001                  | <0.001        |
| <b>&gt; Cardiac Arrhythmia</b>  |                       |                             |                         |               |
| > Cardiac Arrhythmia            | SARS-CoV-2 Group      | 2.14                        | 4.94                    |               |
|                                 | 2020 Comparison Group | 1.68                        | 1.95                    |               |
|                                 | Risk Difference       | 0.46 (0.1 to 0.78)          | 2.99 (2.21 to 3.84)     |               |
|                                 | p-value               | <0.001                      | <0.001                  | <0.001        |
| <b>&gt; Tachycardia</b>         |                       |                             |                         |               |
| > Tachycardia                   | SARS-CoV-2 Group      | 1.92                        | 6.46                    |               |
|                                 | 2020 Comparison Group | 1.27                        | 1.62                    |               |
|                                 | Risk Difference       | 0.66 (0.35 to 0.93)         | 4.84 (4.01 to 5.68)     |               |
|                                 | p-value               | <0.001                      | <0.001                  | <0.001        |
| <b>&gt; POTs</b>                |                       |                             |                         |               |
| > POTs                          | SARS-CoV-2 Group      | 0.84                        | 2.01                    |               |

|                                |                       |                      |                     |        |
|--------------------------------|-----------------------|----------------------|---------------------|--------|
|                                | 2020 Comparison Group | 0.62                 | 0.82                |        |
|                                | Risk Difference       | 0.22 (0.02 to 0.41)  | 1.19 (0.63 to 1.72) |        |
|                                | p-value               | <0.001               | <0.001              | <0.001 |
| CHF Cardiomyopathy Myocarditis | SARS-CoV-2 Group      | 2.28                 | 6.01                |        |
|                                | 2020 Comparison Group | 1.62                 | 2.36                |        |
|                                | Risk Difference       | 0.67 (0.35 to 1.02)  | 3.66 (2.81 to 4.64) |        |
|                                | p-value               | <0.001               | <0.001              | <0.001 |
| > Congestive Heart Failure     | SARS-CoV-2 Group      | 2.03                 | 5.41                |        |
|                                | 2020 Comparison Group | 1.41                 | 2.08                |        |
|                                | Risk Difference       | 0.62 (0.3 to 0.97)   | 3.33 (2.53 to 4.21) |        |
|                                | p-value               | <0.001               | <0.001              | <0.001 |
| > Cardiomyopathy               | SARS-CoV-2 Group      | 0.86                 | 1.83                |        |
|                                | 2020 Comparison Group | 0.71                 | 0.99                |        |
|                                | Risk Difference       | 0.16 (-0.05 to 0.35) | 0.84 (0.37 to 1.32) |        |
|                                | p-value               | 0.95                 | <0.001              | 0.48   |
| > Myocarditis                  | SARS-CoV-2 Group      | 0.02                 | 0.11                |        |
|                                | 2020 Comparison Group | 0.01                 | 0.02                |        |
|                                | Risk Difference       | 0.01 (-0.01 to 0.04) | 0.1 (-0.01 to 0.21) |        |
|                                | p-value               | 1                    | 0.11                | 0.02   |
| Coronary Disease               | SARS-CoV-2 Group      | 1.13                 | 3.21                |        |
|                                | 2020 Comparison Group | 0.82                 | 1.08                |        |
|                                | Risk Difference       | 0.31 (0.08 to 0.57)  | 2.12 (1.58 to 2.69) |        |
|                                | p-value               | <0.001               | <0.001              | <0.001 |
| > Myocardial Infarction        | SARS-CoV-2 Group      | 0.9                  | 2.73                |        |
|                                | 2020 Comparison Group | 0.66                 | 0.88                |        |
|                                | Risk Difference       | 0.24 (0.02 to 0.44)  | 1.85 (1.24 to 2.37) |        |

|                               |                       |                      |                      |        |
|-------------------------------|-----------------------|----------------------|----------------------|--------|
|                               | p-value               | <0.001               | <0.001               | <0.001 |
| > Acute Coronary Syndrome     | SARS-CoV-2 Group      | 1.13                 | 3.17                 |        |
|                               | 2020 Comparison Group | 0.82                 | 1.08                 |        |
|                               | Risk Difference       | 0.31 (0.06 to 0.55)  | 2.09 (1.5 to 2.82)   |        |
|                               | p-value               | <0.001               | <0.001               | <0.001 |
| Cardiogenic Shock             | SARS-CoV-2 Group      | 0.1                  | 0.25                 |        |
|                               | 2020 Comparison Group | 0.08                 | 0.17                 |        |
|                               | Risk Difference       | 0.01 (-0.06 to 0.08) | 0.08 (-0.08 to 0.31) |        |
|                               | p-value               | 1                    | 1                    | 1      |
| Hypercoagulability DVT PE PAO | SARS-CoV-2 Group      | 2.13                 | 7.62                 |        |
|                               | 2020 Comparison Group | 1.09                 | 1.5                  |        |
|                               | Risk Difference       | 1.04 (0.73 to 1.38)  | 6.12 (5.24 to 7.04)  |        |
|                               | p-value               | <0.001               | <0.001               | <0.001 |
| > Hypercoagulability          | SARS-CoV-2 Group      | 1.59                 | 4.94                 |        |
|                               | 2020 Comparison Group | 0.79                 | 1                    |        |
|                               | Risk Difference       | 0.8 (0.54 to 1.12)   | 3.94 (3.09 to 4.6)   |        |
|                               | p-value               | <0.001               | <0.001               | <0.001 |
| > Deep Vein Thrombosis        | SARS-CoV-2 Group      | 1.01                 | 3.78                 |        |
|                               | 2020 Comparison Group | 0.49                 | 0.56                 |        |
|                               | Risk Difference       | 0.52 (0.31 to 0.72)  | 3.22 (2.58 to 3.8)   |        |
|                               | p-value               | <0.001               | <0.001               | <0.001 |
| > Pulmonary Embolism          | SARS-CoV-2 Group      | 0.63                 | 3.22                 |        |
|                               | 2020 Comparison Group | 0.25                 | 0.35                 |        |
|                               | Risk Difference       | 0.39 (0.21 to 0.55)  | 2.87 (2.45 to 3.37)  |        |
|                               | p-value               | <0.001               | <0.001               | <0.001 |

|                                   |                       |                     |                     |        |
|-----------------------------------|-----------------------|---------------------|---------------------|--------|
| > Peripheral Arterial Occlusions  | SARS-CoV-2 Group      | 0.31                | 0.76                |        |
|                                   | 2020 Comparison Group | 0.24                | 0.37                |        |
|                                   | Risk Difference       | 0.07 (-0.04 to 0.2) | 0.38 (0.09 to 0.71) |        |
|                                   | p-value               | 1                   | <0.001              | 0.14   |
| Stroke and Sequelae               | SARS-CoV-2 Group      | 1.59                | 4.56                |        |
|                                   | 2020 Comparison Group | 1.11                | 1.58                |        |
|                                   | Risk Difference       | 0.48 (0.2 to 0.75)  | 2.99 (2.18 to 3.82) |        |
|                                   | p-value               | <0.001              | <0.001              | <0.001 |
| > Ischemic Stroke and Sequelae    | SARS-CoV-2 Group      | 1.4                 | 4.2                 |        |
|                                   | 2020 Comparison Group | 0.98                | 1.39                |        |
|                                   | Risk Difference       | 0.42 (0.17 to 0.66) | 2.8 (2.05 to 3.62)  |        |
|                                   | p-value               | <0.001              | <0.001              | <0.001 |
| > Hemorrhagic Stroke and Sequelae | SARS-CoV-2 Group      | 1.04                | 2.61                |        |
|                                   | 2020 Comparison Group | 0.62                | 0.95                |        |
|                                   | Risk Difference       | 0.41 (0.18 to 0.62) | 1.66 (1.06 to 2.33) |        |
|                                   | p-value               | <0.001              | <0.001              | <0.001 |
| <b>Mental Health</b>              |                       |                     |                     |        |
| Mental Health Diagnosis           | SARS-CoV-2 Group      | 5.02                | 8.11                |        |
|                                   | 2020 Comparison Group | 3.17                | 3.63                |        |
|                                   | Risk Difference       | 1.85 (1.25 to 2.48) | 4.48 (3.38 to 5.94) |        |
|                                   | p-value               | <0.001              | <0.001              | <0.001 |
| Psychosis                         | SARS-CoV-2 Group      | 0.23                | 0.67                |        |
|                                   | 2020 Comparison Group | 0.1                 | 0.22                |        |
|                                   | Risk Difference       | 0.13 (0.04 to 0.24) | 0.45 (0.13 to 0.72) |        |
|                                   | p-value               | <0.001              | <0.001              | 0.003  |

|                           |                       |                      |                       |        |
|---------------------------|-----------------------|----------------------|-----------------------|--------|
| <b>Neurologic</b>         |                       |                      |                       |        |
| Amnesia/Memory Difficulty | SARS-CoV-2 Group      | 3.25                 | 10.99                 |        |
|                           | 2020 Comparison Group | 2                    | 2.83                  |        |
|                           | Risk Difference       | 1.25 (0.87 to 1.61)  | 8.16 (6.91 to 9.39)   |        |
|                           | p-value               | <0.001               | <0.001                | <0.001 |
| Migraine                  | SARS-CoV-2 Group      | 0.34                 | 0.19                  |        |
|                           | 2020 Comparison Group | 0.27                 | 0.26                  |        |
|                           | Risk Difference       | 0.07 (-0.06 to 0.21) | -0.07 (-0.29 to 0.12) |        |
|                           | p-value               | 1                    | 1                     | 0.15   |
| Peripheral Neuropathy     | SARS-CoV-2 Group      | 0.85                 | 1.21                  |        |
|                           | 2020 Comparison Group | 0.74                 | 0.84                  |        |
|                           | Risk Difference       | 0.11 (-0.07 to 0.33) | 0.37 (-0.11 to 0.83)  |        |
|                           | p-value               | 1                    | 0.95                  | 1      |
| Encephalopathy            | SARS-CoV-2 Group      | 1.41                 | 6.82                  |        |
|                           | 2020 Comparison Group | 0.72                 | 1.17                  |        |
|                           | Risk Difference       | 0.69 (0.44 to 0.94)  | 5.65 (4.93 to 6.72)   |        |
|                           | p-value               | <0.001               | <0.001                | <0.001 |
| Seizure                   | SARS-CoV-2 Group      | 0.37                 | 0.92                  |        |
|                           | 2020 Comparison Group | 0.2                  | 0.24                  |        |
|                           | Risk Difference       | 0.17 (0 to 0.29)     | 0.67 (0.28 to 1)      |        |
|                           | p-value               | 0.11                 | <0.001                | <0.001 |
| Dementia                  | SARS-CoV-2 Group      | 1.87                 | 4.85                  |        |
|                           | 2020 Comparison Group | 0.97                 | 1.66                  |        |
|                           | Risk Difference       | 0.9 (0.63 to 1.16)   | 3.19 (2.31 to 4.11)   |        |
|                           | p-value               | <0.001               | <0.001                | <0.001 |
| Guillain-Barre Syndrome   | SARS-CoV-2 Group      | 0.01                 | 0.06                  |        |



|                          |                       |                     |                      |        |
|--------------------------|-----------------------|---------------------|----------------------|--------|
|                          | 2020 Comparison Group | 0                   | 0.02                 |        |
|                          | Risk Difference       | 0.01 (0 to 0.03)    | 0.04 (-0.02 to 0.12) |        |
|                          | p-value               | <0.001              | 1                    | 1      |
| <b>Diabetes</b>          |                       |                     |                      |        |
| Type 2 Diabetes          | SARS-CoV-2 Group      | 2.34                | 5.54                 |        |
|                          | 2020 Comparison Group | 1.41                | 1.83                 |        |
|                          | Risk Difference       | 0.94 (0.47 to 1.53) | 3.71 (2.41 to 4.88)  |        |
|                          | p-value               | <0.001              | <0.001               | <0.001 |
| <b>Liver</b>             |                       |                     |                      |        |
| Liver Test Abnormality   | SARS-CoV-2 Group      | 1.62                | 2.24                 |        |
|                          | 2020 Comparison Group | 1.29                | 1.24                 |        |
|                          | Risk Difference       | 0.33 (0.05 to 0.6)  | 1 (0.29 to 1.55)     |        |
|                          | p-value               | <0.001              | <0.001               | 1      |
| <b>Nephrology</b>        |                       |                     |                      |        |
| Kidney Injury            | SARS-CoV-2 Group      | 4.69                | 13.08                |        |
|                          | 2020 Comparison Group | 3.59                | 4.66                 |        |
|                          | Risk Difference       | 1.1 (0.52 to 1.6)   | 8.42 (7 to 9.83)     |        |
|                          | p-value               | <0.001              | <0.001               | <0.001 |
| > Chronic Kidney Disease | SARS-CoV-2 Group      | 3.66                | 6.6                  |        |
|                          | 2020 Comparison Group | 3.02                | 3.95                 |        |
|                          | Risk Difference       | 0.64 (0.16 to 1.08) | 2.65 (1.33 to 3.67)  |        |
|                          | p-value               | <0.001              | <0.001               | <0.001 |
| > Acute Kidney Injury    | SARS-CoV-2 Group      | 2.52                | 11.13                |        |
|                          | 2020 Comparison Group | 1.56                | 2.35                 |        |
|                          | Risk Difference       | 0.96 (0.62 to 1.31) | 8.78 (7.58 to 9.88)  |        |
|                          | p-value               | <0.001              | <0.001               | <0.001 |
| <b>Respiratory</b>       |                       |                     |                      |        |
| Respiratory Failure      | SARS-CoV-2 Group      | 3.52                | 26.1                 |        |

|                                  |                       |                      |                        |        |
|----------------------------------|-----------------------|----------------------|------------------------|--------|
|                                  | 2020 Comparison Group | 1.33                 | 2.01                   |        |
|                                  | Risk Difference       | 2.18 (1.82 to 2.56)  | 24.1 (22.77 to 25.16)  |        |
|                                  | p-value               | <0.001               | <0.001                 | <0.001 |
| > Acute Respiratory Failure      | SARS-CoV-2 Group      | 2.73                 | 23.8                   |        |
|                                  | 2020 Comparison Group | 0.92                 | 1.48                   |        |
|                                  | Risk Difference       | 1.81 (1.49 to 2.09)  | 22.32 (21.18 to 23.54) |        |
|                                  | p-value               | <0.001               | <0.001                 | <0.001 |
| > Chronic Respiratory Failure    | SARS-CoV-2 Group      | 0.7                  | 3.74                   |        |
|                                  | 2020 Comparison Group | 0.28                 | 0.49                   |        |
|                                  | Risk Difference       | 0.43 (0.29 to 0.59)  | 3.25 (2.64 to 3.9)     |        |
|                                  | p-value               | <0.001               | <0.001                 | <0.001 |
| > Interstitial Lung Disease      | SARS-CoV-2 Group      | 0.88                 | 2.96                   |        |
|                                  | 2020 Comparison Group | 0.47                 | 0.46                   |        |
|                                  | Risk Difference       | 0.41 (0.23 to 0.62)  | 2.51 (1.96 to 3.12)    |        |
|                                  | p-value               | <0.001               | <0.001                 | <0.001 |
| <b>Dermatologic</b>              |                       |                      |                        |        |
| Atopic Dermatitis                | SARS-CoV-2 Group      | 0.28                 | 0.25                   |        |
|                                  | 2020 Comparison Group | 0.23                 | 0.22                   |        |
|                                  | Risk Difference       | 0.04 (-0.08 to 0.16) | 0.03 (-0.18 to 0.23)   |        |
|                                  | p-value               | 1                    | 1                      | 1      |
| Urticaria                        | SARS-CoV-2 Group      | 0.19                 | 0.27                   |        |
|                                  | 2020 Comparison Group | 0.13                 | 0.15                   |        |
|                                  | Risk Difference       | 0.06 (-0.04 to 0.15) | 0.12 (-0.07 to 0.34)   |        |
|                                  | p-value               | 1                    | 1                      | 1      |
| Herpesviral Vesicular Dermatitis | SARS-CoV-2 Group      | 0.09                 | 0.1                    |        |

|                   |                       |                      |                     |        |
|-------------------|-----------------------|----------------------|---------------------|--------|
|                   | 2020 Comparison Group | 0.05                 | 0.02                |        |
|                   | Risk Difference       | 0.04 (-0.02 to 0.11) | 0.08 (0 to 0.2)     |        |
|                   | p-value               | 0.85                 | 0.21                | 1      |
| <b>Others</b>     |                       |                      |                     |        |
| Sleep Apnea       | SARS-CoV-2 Group      | 1.34                 | 2.38                |        |
|                   | 2020 Comparison Group | 1.09                 | 1.11                |        |
|                   | Risk Difference       | 0.25 (-0.1 to 0.55)  | 1.27 (0.68 to 1.9)  |        |
|                   | p-value               | 0.74                 | <0.001              | 0.01   |
| <b>Hematology</b> |                       |                      |                     |        |
| Thrombocytopenia  | SARS-CoV-2 Group      | 0.65                 | 1.7                 |        |
|                   | 2020 Comparison Group | 0.5                  | 0.69                |        |
|                   | Risk Difference       | 0.15 (-0.04 to 0.34) | 1.01 (0.54 to 1.47) |        |
|                   | p-value               | 0.42                 | <0.001              | <0.001 |
| Leukopenia        | SARS-CoV-2 Group      | 0.23                 | 0.48                |        |
|                   | 2020 Comparison Group | 0.16                 | 0.16                |        |
|                   | Risk Difference       | 0.07 (-0.05 to 0.18) | 0.32 (0.1 to 0.56)  |        |
|                   | p-value               | 1                    | <0.001              | 0.02   |
| Anemia            | SARS-CoV-2 Group      | 2.73                 | 5.09                |        |
|                   | 2020 Comparison Group | 1.69                 | 2.13                |        |
|                   | Risk Difference       | 1.04 (0.61 to 1.43)  | 2.96 (2.11 to 3.8)  |        |
|                   | p-value               | <0.001               | <0.001              | 0.01   |
| <b>Symptom</b>    |                       |                      |                     |        |
| Myalgia           | SARS-CoV-2 Group      | 7.36                 | 11.12               |        |
|                   | 2020 Comparison Group | 5.54                 | 6.19                |        |
|                   | Risk Difference       | 1.82 (1.06 to 2.6)   | 4.93 (3.34 to 6.81) |        |
|                   | p-value               | <0.001               | <0.001              | 1      |
| Fatigue Diagnosis | SARS-CoV-2 Group      | 7.74                 | 20.36               |        |
|                   | 2020 Comparison Group | 4.5                  | 5.19                |        |

|                      |                       |                      |                        |        |
|----------------------|-----------------------|----------------------|------------------------|--------|
|                      | Risk Difference       | 3.24 (2.57 to 3.81)  | 15.16 (13.24 to 16.75) |        |
|                      | p-value               | <0.001               | <0.001                 | <0.001 |
| > Fatigue            | SARS-CoV-2 Group      | 7.6                  | 20.06                  |        |
|                      | 2020 Comparison Group | 4.5                  | 5.19                   |        |
|                      | Risk Difference       | 3.11 (2.49 to 3.86)  | 14.88 (13.18 to 16.62) |        |
|                      | p-value               | <0.001               | <0.001                 | <0.001 |
| > Chronic Fatigue    | SARS-CoV-2 Group      | 0.31                 | 0.54                   |        |
|                      | 2020 Comparison Group | 0.25                 | 0.25                   |        |
|                      | Risk Difference       | 0.06 (-0.06 to 0.18) | 0.28 (0.06 to 0.57)    |        |
|                      | p-value               | 1                    | <0.001                 | 1      |
| > Post-viral Fatigue | SARS-CoV-2 Group      | 0.19                 | 0.46                   |        |
|                      | 2020 Comparison Group | 0.02                 | 0.01                   |        |
|                      | Risk Difference       | 0.17 (0.1 to 0.26)   | 0.45 (0.28 to 0.63)    |        |
|                      | p-value               | <0.001               | <0.001                 | <0.001 |
| Anosmia              | SARS-CoV-2 Group      | 0.07                 | 0.07                   |        |
|                      | 2020 Comparison Group | 0.04                 | 0.02                   |        |
|                      | Risk Difference       | 0.04 (-0.02 to 0.09) | 0.05 (-0.06 to 0.16)   |        |
|                      | p-value               | 1                    | 1                      | 1      |

Subgroups are subpopulations of the 2020 cohort.

Hospitalized with COVID subpopulation compares SARS-CoV-2 infected individuals hospitalized due to COVID and individuals within the 2020 comparison group. Meanwhile, Not hospitalized with COVID subpopulation compares SARS-CoV-2 infected individuals not hospitalized due to COVID and individuals within the 2020 comparison group.

Cumulative incidence was obtained by Kaplan-Meier estimator at 120 days after the start of the post-acute phase (141 days after index date).

Confidence intervals were calculated based on Bonferroni correction, i.e.,  $(1 - 0.05/(N \times \text{number of subgroup levels}))$  confidence interval.

Individuals were excluded if they had less than 21 days of observation from the index date, had already been diagnosed with the outcome of interest prior to acute phase, or their matched pair was excluded for the same reasons.

Table 5e: Cumulative Incidence and Risk Difference per 100 Individuals of the SARS-CoV-2 and 2019 Comparison Group for Clinical Sequelae in the Post-Acute Phase by Age

| Clinical Sequelae               | Category              | 65–74               | >74                 | p-interaction |
|---------------------------------|-----------------------|---------------------|---------------------|---------------|
|                                 | Matched Group Size    | 40,750 vs 40,750    | 47,400 vs 47,400    |               |
| <b>Hypertension</b>             |                       |                     |                     |               |
| Hypertension                    | SARS-CoV-2 Group      | 12.08               | 14.81               |               |
|                                 | 2019 Comparison Group | 7.62                | 11.01               |               |
|                                 | Risk Difference       | 4.45 (1.46 to 7.52) | 3.8 (-2.18 to 9.21) |               |
|                                 | p-value               | <0.001              | 1                   | 1             |
| <b>Pulmonary Hypertension</b>   |                       |                     |                     |               |
| Pulmonary Hypertension          | SARS-CoV-2 Group      | 0.74                | 1.25                |               |
|                                 | 2019 Comparison Group | 0.44                | 1.04                |               |
|                                 | Risk Difference       | 0.31 (0.05 to 0.53) | 0.21 (-0.08 to 0.5) |               |
|                                 | p-value               | <0.001              | 1                   | 1             |
| <b>Cardiology</b>               |                       |                     |                     |               |
| <b>Cardiac Rhythm Disorders</b> |                       |                     |                     |               |
| Cardiac Rhythm Disorders        | SARS-CoV-2 Group      | 4.07                | 5.55                |               |
|                                 | 2019 Comparison Group | 2.42                | 4.04                |               |
|                                 | Risk Difference       | 1.65 (1.17 to 2.14) | 1.52 (0.84 to 2.16) |               |
|                                 | p-value               | <0.001              | <0.001              | 0.55          |
| <b>&gt; Cardiac Arrhythmia</b>  |                       |                     |                     |               |
| > Cardiac Arrhythmia            | SARS-CoV-2 Group      | 2.19                | 3.36                |               |
|                                 | 2019 Comparison Group | 1.48                | 2.83                |               |
|                                 | Risk Difference       | 0.71 (0.29 to 1.12) | 0.52 (0.02 to 1.26) |               |
|                                 | p-value               | <0.001              | <0.001              | 0.33          |
| <b>&gt; Tachycardia</b>         |                       |                     |                     |               |
| > Tachycardia                   | SARS-CoV-2 Group      | 2.71                | 3.29                |               |
|                                 | 2019 Comparison Group | 1.38                | 1.79                |               |
|                                 | Risk Difference       | 1.33 (0.84 to 1.76) | 1.5 (1.03 to 1.94)  |               |
|                                 | p-value               | <0.001              | <0.001              | 1             |
| <b>&gt; POTs</b>                |                       |                     |                     |               |
| > POTs                          | SARS-CoV-2 Group      | 0.95                | 1.29                |               |

|                                |                       |                     |                      |      |
|--------------------------------|-----------------------|---------------------|----------------------|------|
|                                | 2019 Comparison Group | 0.56                | 1.08                 |      |
|                                | Risk Difference       | 0.39 (0.17 to 0.63) | 0.21 (-0.09 to 0.51) |      |
|                                | p-value               | <0.001              | 1                    | 0.31 |
| CHF Cardiomyopathy Myocarditis | SARS-CoV-2 Group      | 2.17                | 4.14                 |      |
|                                | 2019 Comparison Group | 1.31                | 2.98                 |      |
|                                | Risk Difference       | 0.86 (0.43 to 1.25) | 1.16 (0.65 to 1.71)  |      |
|                                | p-value               | <0.001              | <0.001               | 1    |
| > Congestive Heart Failure     | SARS-CoV-2 Group      | 1.82                | 3.77                 |      |
|                                | 2019 Comparison Group | 1.1                 | 2.74                 |      |
|                                | Risk Difference       | 0.72 (0.41 to 1.1)  | 1.03 (0.43 to 1.57)  |      |
|                                | p-value               | <0.001              | <0.001               | 1    |
| > Cardiomyopathy               | SARS-CoV-2 Group      | 0.98                | 1.29                 |      |
|                                | 2019 Comparison Group | 0.62                | 0.95                 |      |
|                                | Risk Difference       | 0.35 (0.09 to 0.7)  | 0.34 (-0.04 to 0.66) |      |
|                                | p-value               | <0.001              | 0.32                 | 1    |
| > Myocarditis                  | SARS-CoV-2 Group      | 0.04                | 0.04                 |      |
|                                | 2019 Comparison Group | 0                   | 0.01                 |      |
|                                | Risk Difference       | 0.04 (0 to 0.09)    | 0.03 (-0.01 to 0.07) |      |
|                                | p-value               | 0.21                | 0.64                 | 1    |
| Coronary Disease               | SARS-CoV-2 Group      | 1.39                | 2.07                 |      |
|                                | 2019 Comparison Group | 0.76                | 1.39                 |      |
|                                | Risk Difference       | 0.63 (0.34 to 0.93) | 0.67 (0.3 to 1.04)   |      |
|                                | p-value               | <0.001              | <0.001               | 1    |
| > Myocardial Infarction        | SARS-CoV-2 Group      | 1.14                | 1.73                 |      |
|                                | 2019 Comparison Group | 0.57                | 1.13                 |      |
|                                | Risk Difference       | 0.58 (0.29 to 0.82) | 0.6 (0.22 to 0.93)   |      |

|                               |                       |                      |                      |   |
|-------------------------------|-----------------------|----------------------|----------------------|---|
|                               | p-value               | <0.001               | <0.001               | 1 |
| > Acute Coronary Syndrome     | SARS-CoV-2 Group      | 1.38                 | 2.05                 |   |
|                               | 2019 Comparison Group | 0.76                 | 1.39                 |   |
|                               | Risk Difference       | 0.62 (0.3 to 0.89)   | 0.66 (0.29 to 1.07)  |   |
|                               | p-value               | <0.001               | <0.001               | 1 |
| Cardiogenic Shock             | SARS-CoV-2 Group      | 0.13                 | 0.14                 |   |
|                               | 2019 Comparison Group | 0.08                 | 0.1                  |   |
|                               | Risk Difference       | 0.04 (-0.04 to 0.12) | 0.04 (-0.04 to 0.13) |   |
|                               | p-value               | 1                    | 1                    | 1 |
| Hypercoagulability DVT PE PAO | SARS-CoV-2 Group      | 2.86                 | 3.94                 |   |
|                               | 2019 Comparison Group | 1.19                 | 1.93                 |   |
|                               | Risk Difference       | 1.68 (1.27 to 2.12)  | 2.01 (1.54 to 2.53)  |   |
|                               | p-value               | <0.001               | <0.001               | 1 |
| > Hypercoagulability          | SARS-CoV-2 Group      | 1.92                 | 2.8                  |   |
|                               | 2019 Comparison Group | 0.91                 | 1.47                 |   |
|                               | Risk Difference       | 1.02 (0.69 to 1.35)  | 1.34 (0.96 to 1.75)  |   |
|                               | p-value               | <0.001               | <0.001               | 1 |
| > Deep Vein Thrombosis        | SARS-CoV-2 Group      | 1.39                 | 1.94                 |   |
|                               | 2019 Comparison Group | 0.57                 | 0.85                 |   |
|                               | Risk Difference       | 0.82 (0.51 to 1.11)  | 1.09 (0.79 to 1.44)  |   |
|                               | p-value               | <0.001               | <0.001               | 1 |
| > Pulmonary Embolism          | SARS-CoV-2 Group      | 1.06                 | 1.36                 |   |
|                               | 2019 Comparison Group | 0.26                 | 0.38                 |   |
|                               | Risk Difference       | 0.8 (0.58 to 1.02)   | 0.98 (0.73 to 1.22)  |   |
|                               | p-value               | <0.001               | <0.001               | 1 |

|                                   |                       |                     |                      |   |
|-----------------------------------|-----------------------|---------------------|----------------------|---|
| > Peripheral Arterial Occlusions  | SARS-CoV-2 Group      | 0.41                | 0.42                 |   |
|                                   | 2019 Comparison Group | 0.22                | 0.33                 |   |
|                                   | Risk Difference       | 0.19 (0.04 to 0.37) | 0.09 (-0.06 to 0.28) |   |
|                                   | p-value               | <0.001              | 1                    | 1 |
| Stroke and Sequelae               | SARS-CoV-2 Group      | 1.47                | 3.05                 |   |
|                                   | 2019 Comparison Group | 1.02                | 2.29                 |   |
|                                   | Risk Difference       | 0.45 (0.06 to 0.82) | 0.76 (0.34 to 1.24)  |   |
|                                   | p-value               | <0.001              | <0.001               | 1 |
| > Ischemic Stroke and Sequelae    | SARS-CoV-2 Group      | 1.31                | 2.71                 |   |
|                                   | 2019 Comparison Group | 0.92                | 2.03                 |   |
|                                   | Risk Difference       | 0.39 (0.06 to 0.7)  | 0.68 (0.21 to 1.28)  |   |
|                                   | p-value               | <0.001              | <0.001               | 1 |
| > Hemorrhagic Stroke and Sequelae | SARS-CoV-2 Group      | 0.9                 | 1.81                 |   |
|                                   | 2019 Comparison Group | 0.51                | 1.32                 |   |
|                                   | Risk Difference       | 0.39 (0.15 to 0.66) | 0.49 (0.12 to 0.84)  |   |
|                                   | p-value               | <0.001              | <0.001               | 1 |
| <b>Mental Health</b>              |                       |                     |                      |   |
| Mental Health Diagnosis           | SARS-CoV-2 Group      | 5.14                | 6.58                 |   |
|                                   | 2019 Comparison Group | 3.67                | 4.52                 |   |
|                                   | Risk Difference       | 1.47 (0.73 to 2.18) | 2.07 (1.24 to 3.04)  |   |
|                                   | p-value               | <0.001              | <0.001               | 1 |
| Psychosis                         | SARS-CoV-2 Group      | 0.23                | 0.43                 |   |
|                                   | 2019 Comparison Group | 0.13                | 0.28                 |   |
|                                   | Risk Difference       | 0.1 (-0.02 to 0.24) | 0.16 (-0.02 to 0.35) |   |
|                                   | p-value               | 0.85                | 0.21                 | 1 |



|                           |                       |                      |                       |        |
|---------------------------|-----------------------|----------------------|-----------------------|--------|
| <b>Neurologic</b>         |                       |                      |                       |        |
| Amnesia/Memory Difficulty | SARS-CoV-2 Group      | 3.01                 | 7.92                  |        |
|                           | 2019 Comparison Group | 1.78                 | 4.92                  |        |
|                           | Risk Difference       | 1.23 (0.77 to 1.74)  | 2.99 (2.17 to 3.96)   |        |
|                           | p-value               | <0.001               | <0.001                | <0.001 |
| Migraine                  | SARS-CoV-2 Group      | 0.45                 | 0.21                  |        |
|                           | 2019 Comparison Group | 0.43                 | 0.23                  |        |
|                           | Risk Difference       | 0.02 (-0.18 to 0.23) | -0.02 (-0.17 to 0.11) |        |
|                           | p-value               | 1                    | 1                     | 1      |
| Peripheral Neuropathy     | SARS-CoV-2 Group      | 0.88                 | 1.01                  |        |
|                           | 2019 Comparison Group | 0.84                 | 1.1                   |        |
|                           | Risk Difference       | 0.04 (-0.22 to 0.32) | -0.08 (-0.36 to 0.22) |        |
|                           | p-value               | 1                    | 1                     | 1      |
| Encephalopathy            | SARS-CoV-2 Group      | 1.82                 | 3.72                  |        |
|                           | 2019 Comparison Group | 0.68                 | 1.78                  |        |
|                           | Risk Difference       | 1.14 (0.82 to 1.43)  | 1.94 (1.52 to 2.37)   |        |
|                           | p-value               | <0.001               | <0.001                | 0.02   |
| Seizure                   | SARS-CoV-2 Group      | 0.46                 | 0.63                  |        |
|                           | 2019 Comparison Group | 0.28                 | 0.47                  |        |
|                           | Risk Difference       | 0.17 (0 to 0.36)     | 0.17 (-0.03 to 0.38)  |        |
|                           | p-value               | 0.11                 | 0.53                  | 1      |
| Dementia                  | SARS-CoV-2 Group      | 0.86                 | 4.79                  |        |
|                           | 2019 Comparison Group | 0.4                  | 2.45                  |        |
|                           | Risk Difference       | 0.46 (0.23 to 0.68)  | 2.34 (1.66 to 2.95)   |        |
|                           | p-value               | <0.001               | <0.001                | <0.001 |
| Guillain-Barre Syndrome   | SARS-CoV-2 Group      | 0.01                 | 0.02                  |        |

|                          |                       |                      |                      |      |
|--------------------------|-----------------------|----------------------|----------------------|------|
|                          | 2019 Comparison Group | 0.01                 | 0                    |      |
|                          | Risk Difference       | 0.01 (-0.02 to 0.04) | 0.01 (-0.02 to 0.04) |      |
|                          | p-value               | 1                    | 1                    | 1    |
| <b>Diabetes</b>          |                       |                      |                      |      |
| Type 2 Diabetes          | SARS-CoV-2 Group      | 3.11                 | 3.1                  |      |
|                          | 2019 Comparison Group | 1.57                 | 1.66                 |      |
|                          | Risk Difference       | 1.53 (0.76 to 2.26)  | 1.44 (0.77 to 2.12)  |      |
|                          | p-value               | <0.001               | <0.001               | 1    |
| <b>Liver</b>             |                       |                      |                      |      |
| Liver Test Abnormality   | SARS-CoV-2 Group      | 2.12                 | 1.48                 |      |
|                          | 2019 Comparison Group | 1.51                 | 1.16                 |      |
|                          | Risk Difference       | 0.61 (0.22 to 1.09)  | 0.32 (-0.03 to 0.66) |      |
|                          | p-value               | <0.001               | 0.21                 | 0.02 |
| <b>Nephrology</b>        |                       |                      |                      |      |
| Kidney Injury            | SARS-CoV-2 Group      | 4.79                 | 8.91                 |      |
|                          | 2019 Comparison Group | 3.29                 | 5.93                 |      |
|                          | Risk Difference       | 1.5 (0.77 to 2.26)   | 2.98 (2.02 to 4.06)  |      |
|                          | p-value               | <0.001               | <0.001               | 0.7  |
| > Chronic Kidney Disease | SARS-CoV-2 Group      | 3.12                 | 5.96                 |      |
|                          | 2019 Comparison Group | 2.77                 | 5.01                 |      |
|                          | Risk Difference       | 0.35 (-0.31 to 1.03) | 0.95 (0 to 1.77)     |      |
|                          | p-value               | 1                    | 0.11                 | 1    |
| > Acute Kidney Injury    | SARS-CoV-2 Group      | 3.31                 | 5.88                 |      |
|                          | 2019 Comparison Group | 1.55                 | 2.98                 |      |
|                          | Risk Difference       | 1.76 (1.33 to 2.24)  | 2.89 (2.16 to 3.64)  |      |
|                          | p-value               | <0.001               | <0.001               | 1    |
| <b>Respiratory</b>       |                       |                      |                      |      |
| Respiratory Failure      | SARS-CoV-2 Group      | 7.72                 | 10.35                |      |

|                                  |                       |                      |                       |     |
|----------------------------------|-----------------------|----------------------|-----------------------|-----|
|                                  | 2019 Comparison Group | 1.4                  | 2.69                  |     |
|                                  | Risk Difference       | 6.32 (5.73 to 6.9)   | 7.66 (7.1 to 8.3)     |     |
|                                  | p-value               | <0.001               | <0.001                | 1   |
| > Acute Respiratory Failure      | SARS-CoV-2 Group      | 6.8                  | 9.22                  |     |
|                                  | 2019 Comparison Group | 0.98                 | 1.93                  |     |
|                                  | Risk Difference       | 5.82 (5.36 to 6.28)  | 7.29 (6.77 to 7.87)   |     |
|                                  | p-value               | <0.001               | <0.001                | 1   |
| > Chronic Respiratory Failure    | SARS-CoV-2 Group      | 1.26                 | 1.52                  |     |
|                                  | 2019 Comparison Group | 0.3                  | 0.56                  |     |
|                                  | Risk Difference       | 0.96 (0.72 to 1.21)  | 0.96 (0.7 to 1.26)    |     |
|                                  | p-value               | <0.001               | <0.001                | 1   |
| > Interstitial Lung Disease      | SARS-CoV-2 Group      | 1.21                 | 1.45                  |     |
|                                  | 2019 Comparison Group | 0.48                 | 0.85                  |     |
|                                  | Risk Difference       | 0.73 (0.46 to 0.99)  | 0.59 (0.3 to 0.9)     |     |
|                                  | p-value               | <0.001               | <0.001                | 0.1 |
| <b>Dermatologic</b>              |                       |                      |                       |     |
| Atopic Dermatitis                | SARS-CoV-2 Group      | 0.29                 | 0.25                  |     |
|                                  | 2019 Comparison Group | 0.3                  | 0.33                  |     |
|                                  | Risk Difference       | -0.01 (-0.2 to 0.16) | -0.08 (-0.24 to 0.09) |     |
|                                  | p-value               | 1                    | 1                     | 1   |
| Urticaria                        | SARS-CoV-2 Group      | 0.23                 | 0.17                  |     |
|                                  | 2019 Comparison Group | 0.21                 | 0.16                  |     |
|                                  | Risk Difference       | 0.01 (-0.13 to 0.14) | 0.01 (-0.1 to 0.13)   |     |
|                                  | p-value               | 1                    | 1                     | 1   |
| Herpesviral Vesicular Dermatitis | SARS-CoV-2 Group      | 0.1                  | 0.07                  |     |

|                   |                       |                      |                      |   |
|-------------------|-----------------------|----------------------|----------------------|---|
|                   | 2019 Comparison Group | 0.06                 | 0.06                 |   |
|                   | Risk Difference       | 0.04 (-0.04 to 0.13) | 0.01 (-0.07 to 0.08) |   |
|                   | p-value               | 1                    | 1                    | 1 |
| <b>Others</b>     |                       |                      |                      |   |
| Sleep Apnea       | SARS-CoV-2 Group      | 1.91                 | 1.23                 |   |
|                   | 2019 Comparison Group | 1.77                 | 1.1                  |   |
|                   | Risk Difference       | 0.13 (-0.3 to 0.57)  | 0.12 (-0.21 to 0.46) |   |
|                   | p-value               | 1                    | 1                    | 1 |
| <b>Hematology</b> |                       |                      |                      |   |
| Thrombocytopenia  | SARS-CoV-2 Group      | 0.78                 | 1.01                 |   |
|                   | 2019 Comparison Group | 0.44                 | 0.69                 |   |
|                   | Risk Difference       | 0.34 (0.08 to 0.58)  | 0.32 (0.01 to 0.55)  |   |
|                   | p-value               | <0.001               | <0.001               | 1 |
| Leukopenia        | SARS-CoV-2 Group      | 0.28                 | 0.29                 |   |
|                   | 2019 Comparison Group | 0.14                 | 0.15                 |   |
|                   | Risk Difference       | 0.14 (0.01 to 0.27)  | 0.14 (0 to 0.29)     |   |
|                   | p-value               | <0.001               | 0.11                 | 1 |
| Anemia            | SARS-CoV-2 Group      | 2.62                 | 4.06                 |   |
|                   | 2019 Comparison Group | 1.76                 | 2.64                 |   |
|                   | Risk Difference       | 0.87 (0.36 to 1.49)  | 1.42 (0.81 to 1.98)  |   |
|                   | p-value               | <0.001               | <0.001               | 1 |
| <b>Symptom</b>    |                       |                      |                      |   |
| Myalgia           | SARS-CoV-2 Group      | 6.84                 | 8.84                 |   |
|                   | 2019 Comparison Group | 6.58                 | 7.87                 |   |
|                   | Risk Difference       | 0.26 (-0.66 to 1.25) | 0.97 (-0.14 to 1.93) |   |
|                   | p-value               | 1                    | 0.21                 | 1 |
| Fatigue Diagnosis | SARS-CoV-2 Group      | 8.49                 | 13.32                |   |
|                   | 2019 Comparison Group | 4.32                 | 8.05                 |   |

|                      |                       |                      |                      |      |
|----------------------|-----------------------|----------------------|----------------------|------|
|                      | Risk Difference       | 4.17 (3.27 to 4.99)  | 5.27 (4.2 to 6.55)   |      |
|                      | p-value               | <0.001               | <0.001               | 0.13 |
| > Fatigue            | SARS-CoV-2 Group      | 8.34                 | 13.16                |      |
|                      | 2019 Comparison Group | 4.31                 | 8.06                 |      |
|                      | Risk Difference       | 4.03 (3.24 to 4.97)  | 5.11 (3.8 to 6.27)   |      |
|                      | p-value               | <0.001               | <0.001               | 0.18 |
| > Chronic Fatigue    | SARS-CoV-2 Group      | 0.39                 | 0.38                 |      |
|                      | 2019 Comparison Group | 0.34                 | 0.34                 |      |
|                      | Risk Difference       | 0.04 (-0.14 to 0.21) | 0.04 (-0.12 to 0.22) |      |
|                      | p-value               | 1                    | 1                    | 1    |
| > Post-viral Fatigue | SARS-CoV-2 Group      | 0.25                 | 0.25                 |      |
|                      | 2019 Comparison Group | 0.03                 | 0.01                 |      |
|                      | Risk Difference       | 0.22 (0.12 to 0.33)  | 0.24 (0.16 to 0.33)  |      |
|                      | p-value               | <0.001               | <0.001               | 1    |
| Anosmia              | SARS-CoV-2 Group      | 0.07                 | 0.05                 |      |
|                      | 2019 Comparison Group | 0.02                 | 0.03                 |      |
|                      | Risk Difference       | 0.05 (-0.01 to 0.13) | 0.03 (-0.02 to 0.1)  |      |
|                      | p-value               | 0.85                 | 1                    | 1    |

Subgroups are subpopulations of the SARS-CoV-2 and 2019 cohorts.

Cumulative incidence was obtained by Kaplan-Meier estimator at 120 days after the start of the post-acute phase (141 days after index date).

Confidence intervals were calculated based on Bonferroni correction, i.e.,  $(1 - 0.05/(N \times \text{number of subgroup levels}))$  confidence interval.

Individuals were excluded if they had less than 21 days of observation from the index date, had already been diagnosed with the outcome of interest prior to acute phase, or their matched pair was excluded for the same reasons.

Table 5f: Cumulative Incidence and Risk Difference per 100 Individuals of the SARS-CoV-2 and 2019 Comparison Group for Clinical Sequelae in the Post-Acute Phase by Race

| Clinical Sequelae             | Category              | White                | Black                  | p-interaction |
|-------------------------------|-----------------------|----------------------|------------------------|---------------|
|                               | Matched Group Size    | 68,009 vs 68,009     | 9,320 vs 9,320         |               |
| <b>Hypertension</b>           |                       |                      |                        |               |
| Hypertension                  | SARS-CoV-2 Group      | 13.26                | 22.34                  |               |
|                               | 2019 Comparison Group | 9.15                 | 11.4                   |               |
|                               | Risk Difference       | 4.11 (0.57 to 8.06)  | 10.94 (-9.81 to 27.41) |               |
|                               | p-value               | <0.001               | 1                      | 1             |
| <b>Pulmonary Hypertension</b> |                       |                      |                        |               |
| Pulmonary Hypertension        | SARS-CoV-2 Group      | 0.96                 | 1.16                   |               |
|                               | 2019 Comparison Group | 0.85                 | 0.98                   |               |
|                               | Risk Difference       | 0.11 (-0.14 to 0.34) | 0.18 (-0.47 to 0.75)   |               |
|                               | p-value               | 1                    | 1                      | 1             |
| <b>Cardiology</b>             |                       |                      |                        |               |
| Cardiac Rhythm Disorders      | SARS-CoV-2 Group      | 4.97                 | 5.79                   |               |
|                               | 2019 Comparison Group | 3.43                 | 3.53                   |               |
|                               | Risk Difference       | 1.54 (1.03 to 2.13)  | 2.26 (0.98 to 3.64)    |               |
|                               | p-value               | <0.001               | <0.001                 | 1             |
| > Cardiac Arrhythmia          | SARS-CoV-2 Group      | 2.99                 | 3.55                   |               |
|                               | 2019 Comparison Group | 2.4                  | 2.38                   |               |
|                               | Risk Difference       | 0.59 (0.14 to 1.02)  | 1.17 (0.23 to 2.23)    |               |
|                               | p-value               | <0.001               | <0.001                 | 1             |
| > Tachycardia                 | SARS-CoV-2 Group      | 2.95                 | 3.67                   |               |
|                               | 2019 Comparison Group | 1.61                 | 1.77                   |               |
|                               | Risk Difference       | 1.34 (0.98 to 1.79)  | 1.91 (0.93 to 2.86)    |               |
|                               | p-value               | <0.001               | <0.001                 | 0.97          |
| > POTs                        | SARS-CoV-2 Group      | 1.15                 | 1.68                   |               |

|                                |                       |                      |                      |   |
|--------------------------------|-----------------------|----------------------|----------------------|---|
|                                | 2019 Comparison Group | 0.98                 | 0.9                  |   |
|                                | Risk Difference       | 0.17 (-0.07 to 0.4)  | 0.78 (0.11 to 1.56)  |   |
|                                | p-value               | 1                    | <0.001               | 1 |
| CHF Cardiomyopathy Myocarditis | SARS-CoV-2 Group      | 3.13                 | 3.66                 |   |
|                                | 2019 Comparison Group | 2.36                 | 2.52                 |   |
|                                | Risk Difference       | 0.77 (0.35 to 1.18)  | 1.14 (0.16 to 2.19)  |   |
|                                | p-value               | <0.001               | <0.001               | 1 |
| > Congestive Heart Failure     | SARS-CoV-2 Group      | 2.81                 | 3.49                 |   |
|                                | 2019 Comparison Group | 2.13                 | 1.99                 |   |
|                                | Risk Difference       | 0.68 (0.27 to 1.09)  | 1.5 (0.31 to 2.56)   |   |
|                                | p-value               | <0.001               | <0.001               | 1 |
| > Cardiomyopathy               | SARS-CoV-2 Group      | 1.16                 | 1.24                 |   |
|                                | 2019 Comparison Group | 0.89                 | 1.03                 |   |
|                                | Risk Difference       | 0.26 (0.01 to 0.55)  | 0.21 (-0.39 to 0.89) |   |
|                                | p-value               | <0.001               | 1                    | 1 |
| > Myocarditis                  | SARS-CoV-2 Group      | 0.04                 | 0.05                 |   |
|                                | 2019 Comparison Group | 0.01                 | 0                    |   |
|                                | Risk Difference       | 0.03 (-0.01 to 0.06) | 0.05 (0 to 0.2)      |   |
|                                | p-value               | 1                    | <0.001               | 1 |
| Coronary Disease               | SARS-CoV-2 Group      | 1.73                 | 1.87                 |   |
|                                | 2019 Comparison Group | 1.22                 | 1.2                  |   |
|                                | Risk Difference       | 0.51 (0.21 to 0.8)   | 0.67 (-0.17 to 1.32) |   |
|                                | p-value               | <0.001               | 0.21                 | 1 |
| > Myocardial Infarction        | SARS-CoV-2 Group      | 1.43                 | 1.53                 |   |
|                                | 2019 Comparison Group | 0.96                 | 1.06                 |   |
|                                | Risk Difference       | 0.47 (0.2 to 0.73)   | 0.47 (-0.15 to 1.21) |   |

|                               |                       |                      |                      |      |
|-------------------------------|-----------------------|----------------------|----------------------|------|
|                               | p-value               | <0.001               | 0.85                 | 1    |
| > Acute Coronary Syndrome     | SARS-CoV-2 Group      | 1.72                 | 1.86                 |      |
|                               | 2019 Comparison Group | 1.22                 | 1.2                  |      |
|                               | Risk Difference       | 0.5 (0.24 to 0.82)   | 0.66 (-0.07 to 1.31) |      |
|                               | p-value               | <0.001               | 0.21                 | 1    |
| Cardiogenic Shock             | SARS-CoV-2 Group      | 0.13                 | 0.25                 |      |
|                               | 2019 Comparison Group | 0.09                 | 0.14                 |      |
|                               | Risk Difference       | 0.04 (-0.03 to 0.12) | 0.11 (-0.12 to 0.35) |      |
|                               | p-value               | 1                    | 1                    | 1    |
| Hypercoagulability DVT PE PAO | SARS-CoV-2 Group      | 3.44                 | 4.32                 |      |
|                               | 2019 Comparison Group | 1.6                  | 2.37                 |      |
|                               | Risk Difference       | 1.84 (1.47 to 2.18)  | 1.95 (0.98 to 3.17)  |      |
|                               | p-value               | <0.001               | <0.001               | 1    |
| > Hypercoagulability          | SARS-CoV-2 Group      | 2.37                 | 3.2                  |      |
|                               | 2019 Comparison Group | 1.25                 | 1.74                 |      |
|                               | Risk Difference       | 1.12 (0.81 to 1.52)  | 1.46 (0.62 to 2.4)   |      |
|                               | p-value               | <0.001               | <0.001               | 1    |
| > Deep Vein Thrombosis        | SARS-CoV-2 Group      | 1.66                 | 2.48                 |      |
|                               | 2019 Comparison Group | 0.68                 | 1.18                 |      |
|                               | Risk Difference       | 0.98 (0.73 to 1.21)  | 1.3 (0.52 to 2.08)   |      |
|                               | p-value               | <0.001               | <0.001               | 1    |
| > Pulmonary Embolism          | SARS-CoV-2 Group      | 1.22                 | 1.58                 |      |
|                               | 2019 Comparison Group | 0.33                 | 0.44                 |      |
|                               | Risk Difference       | 0.88 (0.7 to 1.07)   | 1.14 (0.62 to 1.67)  |      |
|                               | p-value               | <0.001               | <0.001               | 0.03 |



|                                   |                       |                      |                      |       |
|-----------------------------------|-----------------------|----------------------|----------------------|-------|
| > Peripheral Arterial Occlusions  | SARS-CoV-2 Group      | 0.39                 | 0.61                 |       |
|                                   | 2019 Comparison Group | 0.27                 | 0.41                 |       |
|                                   | Risk Difference       | 0.12 (-0.04 to 0.25) | 0.2 (-0.22 to 0.57)  |       |
|                                   | p-value               | 0.21                 | 1                    | 1     |
| Stroke and Sequelae               | SARS-CoV-2 Group      | 2.32                 | 2.69                 |       |
|                                   | 2019 Comparison Group | 1.74                 | 1.94                 |       |
|                                   | Risk Difference       | 0.58 (0.2 to 0.92)   | 0.75 (-0.07 to 1.62) |       |
|                                   | p-value               | <0.001               | 0.32                 | 1     |
| > Ischemic Stroke and Sequelae    | SARS-CoV-2 Group      | 2.07                 | 2.57                 |       |
|                                   | 2019 Comparison Group | 1.52                 | 1.9                  |       |
|                                   | Risk Difference       | 0.55 (0.2 to 0.85)   | 0.66 (-0.29 to 1.63) |       |
|                                   | p-value               | <0.001               | 1                    | 1     |
| > Hemorrhagic Stroke and Sequelae | SARS-CoV-2 Group      | 1.37                 | 1.56                 |       |
|                                   | 2019 Comparison Group | 0.92                 | 0.92                 |       |
|                                   | Risk Difference       | 0.44 (0.15 to 0.7)   | 0.64 (0.06 to 1.33)  |       |
|                                   | p-value               | <0.001               | <0.001               | 1     |
| <b>Mental Health</b>              |                       |                      |                      |       |
| Mental Health Diagnosis           | SARS-CoV-2 Group      | 6.49                 | 3.72                 |       |
|                                   | 2019 Comparison Group | 4.36                 | 3.49                 |       |
|                                   | Risk Difference       | 2.13 (1.41 to 2.89)  | 0.24 (-1 to 1.79)    |       |
|                                   | p-value               | <0.001               | 1                    | 0.001 |
| Psychosis                         | SARS-CoV-2 Group      | 0.38                 | 0.27                 |       |
|                                   | 2019 Comparison Group | 0.26                 | 0.23                 |       |
|                                   | Risk Difference       | 0.12 (-0.02 to 0.28) | 0.04 (-0.22 to 0.36) |       |
|                                   | p-value               | 0.32                 | 1                    | 1     |

|                           |                       |                      |                       |      |
|---------------------------|-----------------------|----------------------|-----------------------|------|
| <b>Neurologic</b>         |                       |                      |                       |      |
| Amnesia/Memory Difficulty | SARS-CoV-2 Group      | 5.45                 | 6.05                  |      |
|                           | 2019 Comparison Group | 3.71                 | 3.39                  |      |
|                           | Risk Difference       | 1.74 (1.22 to 2.37)  | 2.66 (1.28 to 3.96)   |      |
|                           | p-value               | <0.001               | <0.001                | 1    |
| Migraine                  | SARS-CoV-2 Group      | 0.35                 | 0.21                  |      |
|                           | 2019 Comparison Group | 0.31                 | 0.24                  |      |
|                           | Risk Difference       | 0.03 (-0.11 to 0.16) | -0.03 (-0.32 to 0.24) |      |
|                           | p-value               | 1                    | 1                     | 1    |
| Peripheral Neuropathy     | SARS-CoV-2 Group      | 1.01                 | 0.82                  |      |
|                           | 2019 Comparison Group | 0.98                 | 1.07                  |      |
|                           | Risk Difference       | 0.03 (-0.24 to 0.3)  | -0.25 (-0.92 to 0.33) |      |
|                           | p-value               | 1                    | 1                     | 1    |
| Encephalopathy            | SARS-CoV-2 Group      | 2.82                 | 3.79                  |      |
|                           | 2019 Comparison Group | 1.37                 | 1.68                  |      |
|                           | Risk Difference       | 1.45 (1.13 to 1.85)  | 2.11 (1.15 to 3.24)   |      |
|                           | p-value               | <0.001               | <0.001                | 0.49 |
| Seizure                   | SARS-CoV-2 Group      | 0.52                 | 0.74                  |      |
|                           | 2019 Comparison Group | 0.4                  | 0.65                  |      |
|                           | Risk Difference       | 0.12 (-0.04 to 0.28) | 0.09 (-0.38 to 0.53)  |      |
|                           | p-value               | 1                    | 1                     | 1    |
| Dementia                  | SARS-CoV-2 Group      | 2.91                 | 2.76                  |      |
|                           | 2019 Comparison Group | 1.7                  | 1.76                  |      |
|                           | Risk Difference       | 1.21 (0.74 to 1.6)   | 1 (0 to 2.01)         |      |
|                           | p-value               | <0.001               | 0.11                  | 1    |
| Guillain-Barre Syndrome   | SARS-CoV-2 Group      | 0.02                 | 0.05                  |      |

|                          |                       |                      |                      |        |
|--------------------------|-----------------------|----------------------|----------------------|--------|
|                          | 2019 Comparison Group | 0                    | 0.03                 |        |
|                          | Risk Difference       | 0.01 (0 to 0.03)     | 0.02 (-0.08 to 0.14) |        |
|                          | p-value               | 0.21                 | 1                    | 1      |
| <b>Diabetes</b>          |                       |                      |                      |        |
| Type 2 Diabetes          | SARS-CoV-2 Group      | 2.67                 | 4.72                 |        |
|                          | 2019 Comparison Group | 1.55                 | 2.89                 |        |
|                          | Risk Difference       | 1.12 (0.52 to 1.69)  | 1.83 (-0.38 to 4.05) |        |
|                          | p-value               | <0.001               | 0.53                 | 1      |
| <b>Liver</b>             |                       |                      |                      |        |
| Liver Test Abnormality   | SARS-CoV-2 Group      | 1.7                  | 2.08                 |        |
|                          | 2019 Comparison Group | 1.34                 | 1.6                  |        |
|                          | Risk Difference       | 0.36 (0.02 to 0.63)  | 0.48 (-0.32 to 1.31) |        |
|                          | p-value               | 0.11                 | 1                    | 1      |
| <b>Nephrology</b>        |                       |                      |                      |        |
| Kidney Injury            | SARS-CoV-2 Group      | 6.38                 | 10.02                |        |
|                          | 2019 Comparison Group | 4.92                 | 6.43                 |        |
|                          | Risk Difference       | 1.46 (0.73 to 2.29)  | 3.59 (1.48 to 6.03)  |        |
|                          | p-value               | <0.001               | <0.001               | 1      |
| > Chronic Kidney Disease | SARS-CoV-2 Group      | 4.25                 | 6.35                 |        |
|                          | 2019 Comparison Group | 4.04                 | 5.21                 |        |
|                          | Risk Difference       | 0.21 (-0.35 to 0.81) | 1.13 (-0.95 to 2.88) |        |
|                          | p-value               | 1                    | 1                    | 1      |
| > Acute Kidney Injury    | SARS-CoV-2 Group      | 4.3                  | 7.58                 |        |
|                          | 2019 Comparison Group | 2.51                 | 3.34                 |        |
|                          | Risk Difference       | 1.79 (1.28 to 2.22)  | 4.24 (2.92 to 5.58)  |        |
|                          | p-value               | <0.001               | <0.001               | <0.001 |
| <b>Respiratory</b>       |                       |                      |                      |        |
| Respiratory Failure      | SARS-CoV-2 Group      | 8.8                  | 10.43                |        |

|                                  |                       |                      |                      |        |
|----------------------------------|-----------------------|----------------------|----------------------|--------|
|                                  | 2019 Comparison Group | 2.18                 | 1.74                 |        |
|                                  | Risk Difference       | 6.62 (6.06 to 7.17)  | 8.69 (7.54 to 9.96)  |        |
|                                  | p-value               | <0.001               | <0.001               | <0.001 |
| > Acute Respiratory Failure      | SARS-CoV-2 Group      | 7.73                 | 9.6                  |        |
|                                  | 2019 Comparison Group | 1.53                 | 1.49                 |        |
|                                  | Risk Difference       | 6.19 (5.77 to 6.72)  | 8.11 (6.91 to 9.32)  |        |
|                                  | p-value               | <0.001               | <0.001               | <0.001 |
| > Chronic Respiratory Failure    | SARS-CoV-2 Group      | 1.36                 | 1.41                 |        |
|                                  | 2019 Comparison Group | 0.5                  | 0.38                 |        |
|                                  | Risk Difference       | 0.86 (0.66 to 1.12)  | 1.02 (0.59 to 1.65)  |        |
|                                  | p-value               | <0.001               | <0.001               | 1      |
| > Interstitial Lung Disease      | SARS-CoV-2 Group      | 1.34                 | 1.38                 |        |
|                                  | 2019 Comparison Group | 0.68                 | 0.41                 |        |
|                                  | Risk Difference       | 0.66 (0.43 to 0.92)  | 0.97 (0.43 to 1.55)  |        |
|                                  | p-value               | <0.001               | <0.001               | 1      |
| <b>Dermatologic</b>              |                       |                      |                      |        |
| Atopic Dermatitis                | SARS-CoV-2 Group      | 0.28                 | 0.27                 |        |
|                                  | 2019 Comparison Group | 0.28                 | 0.24                 |        |
|                                  | Risk Difference       | 0.01 (-0.14 to 0.14) | 0.03 (-0.3 to 0.38)  |        |
|                                  | p-value               | 1                    | 1                    | 1      |
| Urticaria                        | SARS-CoV-2 Group      | 0.2                  | 0.21                 |        |
|                                  | 2019 Comparison Group | 0.19                 | 0.2                  |        |
|                                  | Risk Difference       | 0.01 (-0.1 to 0.12)  | 0.01 (-0.22 to 0.26) |        |
|                                  | p-value               | 1                    | 1                    | 1      |
| Herpesviral Vesicular Dermatitis | SARS-CoV-2 Group      | 0.11                 | 0.02                 |        |

|                   |                       |                      |                       |      |
|-------------------|-----------------------|----------------------|-----------------------|------|
|                   | 2019 Comparison Group | 0.05                 | 0.05                  |      |
|                   | Risk Difference       | 0.06 (0 to 0.12)     | -0.03 (-0.15 to 0.08) |      |
|                   | p-value               | 0.32                 | 1                     | 1    |
| <b>Others</b>     |                       |                      |                       |      |
| Sleep Apnea       | SARS-CoV-2 Group      | 1.62                 | 1.36                  |      |
|                   | 2019 Comparison Group | 1.43                 | 1.19                  |      |
|                   | Risk Difference       | 0.19 (-0.17 to 0.51) | 0.17 (-0.54 to 0.96)  |      |
|                   | p-value               | 1                    | 1                     | 1    |
| <b>Hematology</b> |                       |                      |                       |      |
| Thrombocytopenia  | SARS-CoV-2 Group      | 0.89                 | 0.86                  |      |
|                   | 2019 Comparison Group | 0.59                 | 0.64                  |      |
|                   | Risk Difference       | 0.3 (0.13 to 0.51)   | 0.22 (-0.38 to 0.72)  |      |
|                   | p-value               | <0.001               | 1                     | 1    |
| Leukopenia        | SARS-CoV-2 Group      | 0.29                 | 0.36                  |      |
|                   | 2019 Comparison Group | 0.16                 | 0.38                  |      |
|                   | Risk Difference       | 0.13 (0 to 0.24)     | -0.02 (-0.36 to 0.35) |      |
|                   | p-value               | <0.001               | 1                     | 1    |
| Anemia            | SARS-CoV-2 Group      | 3.16                 | 4.02                  |      |
|                   | 2019 Comparison Group | 2.15                 | 2.9                   |      |
|                   | Risk Difference       | 1.01 (0.57 to 1.42)  | 1.12 (-0.03 to 2.37)  |      |
|                   | p-value               | <0.001               | 0.11                  | 1    |
| <b>Symptom</b>    |                       |                      |                       |      |
| Myalgia           | SARS-CoV-2 Group      | 8.12                 | 7.89                  |      |
|                   | 2019 Comparison Group | 7.14                 | 7.78                  |      |
|                   | Risk Difference       | 0.98 (0.09 to 1.98)  | 0.11 (-1.72 to 2.27)  |      |
|                   | p-value               | <0.001               | 1                     | 0.62 |
| Fatigue Diagnosis | SARS-CoV-2 Group      | 11.11                | 11.5                  |      |
|                   | 2019 Comparison Group | 7.19                 | 6                     |      |

|                      |                       |                      |                      |   |
|----------------------|-----------------------|----------------------|----------------------|---|
|                      | Risk Difference       | 3.92 (2.9 to 4.69)   | 5.5 (3.45 to 8.01)   |   |
|                      | p-value               | <0.001               | <0.001               | 1 |
| > Fatigue            | SARS-CoV-2 Group      | 10.95                | 11.34                |   |
|                      | 2019 Comparison Group | 7.19                 | 5.96                 |   |
|                      | Risk Difference       | 3.77 (2.94 to 4.71)  | 5.37 (3.33 to 7.33)  |   |
|                      | p-value               | <0.001               | <0.001               | 1 |
| > Chronic Fatigue    | SARS-CoV-2 Group      | 0.39                 | 0.32                 |   |
|                      | 2019 Comparison Group | 0.37                 | 0.28                 |   |
|                      | Risk Difference       | 0.03 (-0.12 to 0.21) | 0.04 (-0.33 to 0.42) |   |
|                      | p-value               | 1                    | 1                    | 1 |
| > Post-viral Fatigue | SARS-CoV-2 Group      | 0.25                 | 0.23                 |   |
|                      | 2019 Comparison Group | 0.03                 | 0.08                 |   |
|                      | Risk Difference       | 0.22 (0.13 to 0.31)  | 0.16 (-0.09 to 0.37) |   |
|                      | p-value               | <0.001               | 1                    | 1 |
| Anosmia              | SARS-CoV-2 Group      | 0.07                 | 0.08                 |   |
|                      | 2019 Comparison Group | 0.03                 | 0.01                 |   |
|                      | Risk Difference       | 0.04 (-0.02 to 0.09) | 0.06 (-0.04 to 0.2)  |   |
|                      | p-value               | 1                    | 1                    | 1 |

Subgroups are subpopulations of the SARS-CoV-2 and 2019 cohorts.

Cumulative incidence was obtained by Kaplan-Meier estimator at 120 days after the start of the post-acute phase (141 days after index date).

Confidence intervals were calculated based on Bonferroni correction, i.e.,  $(1 - 0.05/(N \times \text{number of subgroup levels}))$  confidence interval.

Individuals were excluded if they had less than 21 days of observation from the index date, had already been diagnosed with the outcome of interest prior to acute phase, or their matched pair was excluded for the same reasons.

Table 5g: Cumulative Incidence and Risk Difference per 100 Individuals of the SARS-CoV-2 and 2019 Comparison Group for Clinical Sequelae in the Post-Acute Phase by Gender

| Clinical Sequelae               | Category              | Female               | Male                 | p-interaction |
|---------------------------------|-----------------------|----------------------|----------------------|---------------|
|                                 | Matched Group Size    | 49,853 vs 49,853     | 38,208 vs 38,208     |               |
| <b>Hypertension</b>             |                       |                      |                      |               |
| Hypertension                    | SARS-CoV-2 Group      | 11.58                | 15.01                |               |
|                                 | 2019 Comparison Group | 8.86                 | 10.47                |               |
|                                 | Risk Difference       | 2.72 (-0.71 to 6.25) | 4.54 (-0.53 to 9.53) |               |
|                                 | p-value               | 0.85                 | 0.11                 | 1             |
| <b>Pulmonary Hypertension</b>   |                       |                      |                      |               |
| Pulmonary Hypertension          | SARS-CoV-2 Group      | 0.98                 | 1                    |               |
|                                 | 2019 Comparison Group | 0.85                 | 0.8                  |               |
|                                 | Risk Difference       | 0.13 (-0.09 to 0.42) | 0.2 (-0.16 to 0.48)  |               |
|                                 | p-value               | 1                    | 1                    | 1             |
| <b>Cardiology</b>               |                       |                      |                      |               |
| <b>Cardiac Rhythm Disorders</b> |                       |                      |                      |               |
| Cardiac Rhythm Disorders        | SARS-CoV-2 Group      | 4.3                  | 5.79                 |               |
|                                 | 2019 Comparison Group | 2.81                 | 3.46                 |               |
|                                 | Risk Difference       | 1.49 (0.93 to 2.03)  | 2.32 (1.61 to 3.02)  |               |
|                                 | p-value               | <0.001               | <0.001               | 1             |
| <b>&gt; Cardiac Arrhythmia</b>  |                       |                      |                      |               |
| > Cardiac Arrhythmia            | SARS-CoV-2 Group      | 2.39                 | 3.52                 |               |
|                                 | 2019 Comparison Group | 1.85                 | 2.41                 |               |
|                                 | Risk Difference       | 0.55 (0.15 to 0.96)  | 1.1 (0.55 to 1.54)   |               |
|                                 | p-value               | <0.001               | <0.001               | 1             |
| <b>&gt; Tachycardia</b>         |                       |                      |                      |               |
| > Tachycardia                   | SARS-CoV-2 Group      | 2.59                 | 3.54                 |               |
|                                 | 2019 Comparison Group | 1.46                 | 1.69                 |               |
|                                 | Risk Difference       | 1.13 (0.73 to 1.5)   | 1.85 (1.33 to 2.36)  |               |
|                                 | p-value               | <0.001               | <0.001               | 0.22          |
| <b>&gt; POTs</b>                |                       |                      |                      |               |
| > POTs                          | SARS-CoV-2 Group      | 1.01                 | 1.36                 |               |

|                                |                       |                      |                      |   |
|--------------------------------|-----------------------|----------------------|----------------------|---|
|                                | 2019 Comparison Group | 0.76                 | 0.92                 |   |
|                                | Risk Difference       | 0.26 (-0.04 to 0.56) | 0.44 (0.08 to 0.76)  |   |
|                                | p-value               | 0.21                 | <0.001               | 1 |
| CHF Cardiomyopathy Myocarditis | SARS-CoV-2 Group      | 2.75                 | 3.57                 |   |
|                                | 2019 Comparison Group | 2.07                 | 2.47                 |   |
|                                | Risk Difference       | 0.67 (0.25 to 1.07)  | 1.1 (0.39 to 1.74)   |   |
|                                | p-value               | <0.001               | <0.001               | 1 |
| > Congestive Heart Failure     | SARS-CoV-2 Group      | 2.46                 | 3.16                 |   |
|                                | 2019 Comparison Group | 1.87                 | 2.25                 |   |
|                                | Risk Difference       | 0.58 (0.16 to 1.04)  | 0.91 (0.31 to 1.58)  |   |
|                                | p-value               | <0.001               | <0.001               | 1 |
| > Cardiomyopathy               | SARS-CoV-2 Group      | 0.89                 | 1.44                 |   |
|                                | 2019 Comparison Group | 0.55                 | 1.09                 |   |
|                                | Risk Difference       | 0.34 (0.11 to 0.57)  | 0.34 (-0.02 to 0.74) |   |
|                                | p-value               | <0.001               | 0.11                 | 1 |
| > Myocarditis                  | SARS-CoV-2 Group      | 0.05                 | 0.03                 |   |
|                                | 2019 Comparison Group | 0.01                 | 0.02                 |   |
|                                | Risk Difference       | 0.04 (0 to 0.1)      | 0.01 (-0.03 to 0.06) |   |
|                                | p-value               | <0.001               | 1                    | 1 |
| Coronary Disease               | SARS-CoV-2 Group      | 1.51                 | 1.99                 |   |
|                                | 2019 Comparison Group | 0.95                 | 1.5                  |   |
|                                | Risk Difference       | 0.56 (0.19 to 0.85)  | 0.49 (0.01 to 0.9)   |   |
|                                | p-value               | <0.001               | 0.11                 | 1 |
| > Myocardial Infarction        | SARS-CoV-2 Group      | 1.28                 | 1.55                 |   |
|                                | 2019 Comparison Group | 0.74                 | 1.14                 |   |
|                                | Risk Difference       | 0.54 (0.25 to 0.85)  | 0.41 (0.05 to 0.75)  |   |



|                               |                       |                      |                      |      |
|-------------------------------|-----------------------|----------------------|----------------------|------|
|                               | p-value               | <0.001               | <0.001               | 1    |
| > Acute Coronary Syndrome     | SARS-CoV-2 Group      | 1.5                  | 1.97                 |      |
|                               | 2019 Comparison Group | 0.95                 | 1.49                 |      |
|                               | Risk Difference       | 0.55 (0.26 to 0.88)  | 0.48 (-0.01 to 0.87) |      |
|                               | p-value               | <0.001               | 0.11                 | 1    |
| Cardiogenic Shock             | SARS-CoV-2 Group      | 0.09                 | 0.21                 |      |
|                               | 2019 Comparison Group | 0.04                 | 0.13                 |      |
|                               | Risk Difference       | 0.04 (-0.02 to 0.11) | 0.07 (-0.05 to 0.19) |      |
|                               | p-value               | 1                    | 1                    | 1    |
| Hypercoagulability DVT PE PAO | SARS-CoV-2 Group      | 3.05                 | 3.84                 |      |
|                               | 2019 Comparison Group | 1.39                 | 1.73                 |      |
|                               | Risk Difference       | 1.66 (1.3 to 2.17)   | 2.11 (1.64 to 2.57)  |      |
|                               | p-value               | <0.001               | <0.001               | 0.12 |
| > Hypercoagulability          | SARS-CoV-2 Group      | 2.2                  | 2.55                 |      |
|                               | 2019 Comparison Group | 1.08                 | 1.39                 |      |
|                               | Risk Difference       | 1.12 (0.81 to 1.5)   | 1.16 (0.7 to 1.69)   |      |
|                               | p-value               | <0.001               | <0.001               | 1    |
| > Deep Vein Thrombosis        | SARS-CoV-2 Group      | 1.58                 | 1.73                 |      |
|                               | 2019 Comparison Group | 0.64                 | 0.78                 |      |
|                               | Risk Difference       | 0.93 (0.66 to 1.26)  | 0.95 (0.6 to 1.26)   |      |
|                               | p-value               | <0.001               | <0.001               | 1    |
| > Pulmonary Embolism          | SARS-CoV-2 Group      | 1.05                 | 1.43                 |      |
|                               | 2019 Comparison Group | 0.31                 | 0.37                 |      |
|                               | Risk Difference       | 0.75 (0.56 to 0.97)  | 1.05 (0.76 to 1.37)  |      |
|                               | p-value               | <0.001               | <0.001               | 0.11 |

|                                   |                       |                      |                     |       |
|-----------------------------------|-----------------------|----------------------|---------------------|-------|
| > Peripheral Arterial Occlusions  | SARS-CoV-2 Group      | 0.29                 | 0.61                |       |
|                                   | 2019 Comparison Group | 0.25                 | 0.27                |       |
|                                   | Risk Difference       | 0.04 (-0.08 to 0.18) | 0.34 (0.13 to 0.55) |       |
|                                   | p-value               | 1                    | <0.001              | 0.003 |
| Stroke and Sequelae               | SARS-CoV-2 Group      | 2.23                 | 2.39                |       |
|                                   | 2019 Comparison Group | 1.58                 | 1.73                |       |
|                                   | Risk Difference       | 0.65 (0.25 to 1.04)  | 0.66 (0.26 to 1.07) |       |
|                                   | p-value               | <0.001               | <0.001              | 1     |
| > Ischemic Stroke and Sequelae    | SARS-CoV-2 Group      | 1.99                 | 2.16                |       |
|                                   | 2019 Comparison Group | 1.42                 | 1.55                |       |
|                                   | Risk Difference       | 0.58 (0.2 to 0.93)   | 0.61 (0.14 to 1.17) |       |
|                                   | p-value               | <0.001               | <0.001              | 1     |
| > Hemorrhagic Stroke and Sequelae | SARS-CoV-2 Group      | 1.28                 | 1.44                |       |
|                                   | 2019 Comparison Group | 0.92                 | 0.97                |       |
|                                   | Risk Difference       | 0.35 (0.02 to 0.67)  | 0.47 (0.15 to 0.78) |       |
|                                   | p-value               | <0.001               | <0.001              | 1     |
| <b>Mental Health</b>              |                       |                      |                     |       |
| Mental Health Diagnosis           | SARS-CoV-2 Group      | 6.95                 | 4.32                |       |
|                                   | 2019 Comparison Group | 5.15                 | 3.01                |       |
|                                   | Risk Difference       | 1.8 (1.02 to 2.76)   | 1.31 (0.7 to 2.11)  |       |
|                                   | p-value               | <0.001               | <0.001              | 1     |
| Psychosis                         | SARS-CoV-2 Group      | 0.36                 | 0.34                |       |
|                                   | 2019 Comparison Group | 0.27                 | 0.19                |       |
|                                   | Risk Difference       | 0.08 (-0.06 to 0.23) | 0.15 (0 to 0.32)    |       |
|                                   | p-value               | 1                    | 0.32                | 1     |

|                           |                       |                       |                      |      |
|---------------------------|-----------------------|-----------------------|----------------------|------|
| <b>Neurologic</b>         |                       |                       |                      |      |
| Amnesia/Memory Difficulty | SARS-CoV-2 Group      | 5.61                  | 5.19                 |      |
|                           | 2019 Comparison Group | 4.04                  | 3.06                 |      |
|                           | Risk Difference       | 1.57 (0.92 to 2.27)   | 2.14 (1.42 to 2.9)   |      |
|                           | p-value               | <0.001                | <0.001               | 1    |
| Migraine                  | SARS-CoV-2 Group      | 0.43                  | 0.21                 |      |
|                           | 2019 Comparison Group | 0.37                  | 0.19                 |      |
|                           | Risk Difference       | 0.07 (-0.1 to 0.24)   | 0.03 (-0.11 to 0.19) |      |
|                           | p-value               | 1                     | 1                    | 1    |
| Peripheral Neuropathy     | SARS-CoV-2 Group      | 0.89                  | 0.93                 |      |
|                           | 2019 Comparison Group | 0.97                  | 1.09                 |      |
|                           | Risk Difference       | -0.08 (-0.36 to 0.19) | -0.16 (-0.5 to 0.17) |      |
|                           | p-value               | 1                     | 1                    | 1    |
| Encephalopathy            | SARS-CoV-2 Group      | 2.72                  | 2.96                 |      |
|                           | 2019 Comparison Group | 1.32                  | 1.39                 |      |
|                           | Risk Difference       | 1.4 (1.01 to 1.87)    | 1.57 (1.08 to 2.09)  |      |
|                           | p-value               | <0.001                | <0.001               | 1    |
| Seizure                   | SARS-CoV-2 Group      | 0.55                  | 0.55                 |      |
|                           | 2019 Comparison Group | 0.43                  | 0.35                 |      |
|                           | Risk Difference       | 0.11 (-0.04 to 0.29)  | 0.2 (0.01 to 0.4)    |      |
|                           | p-value               | 1                     | <0.001               | 1    |
| Dementia                  | SARS-CoV-2 Group      | 3.12                  | 2.47                 |      |
|                           | 2019 Comparison Group | 1.63                  | 1.43                 |      |
|                           | Risk Difference       | 1.5 (0.98 to 1.99)    | 1.05 (0.59 to 1.55)  |      |
|                           | p-value               | <0.001                | <0.001               | 0.49 |
| Guillain-Barre Syndrome   | SARS-CoV-2 Group      | 0.02                  | 0.02                 |      |

|                          |                       |                     |                      |        |
|--------------------------|-----------------------|---------------------|----------------------|--------|
|                          | 2019 Comparison Group | 0                   | 0.01                 |        |
|                          | Risk Difference       | 0.02 (0 to 0.04)    | 0.01 (-0.03 to 0.05) |        |
|                          | p-value               | <0.001              | 1                    | 1      |
| <b>Diabetes</b>          |                       |                     |                      |        |
| Type 2 Diabetes          | SARS-CoV-2 Group      | 2.62                | 3.83                 |        |
|                          | 2019 Comparison Group | 1.69                | 1.76                 |        |
|                          | Risk Difference       | 0.94 (0.29 to 1.63) | 2.07 (0.93 to 2.8)   |        |
|                          | p-value               | <0.001              | <0.001               | 0.04   |
| <b>Liver</b>             |                       |                     |                      |        |
| Liver Test Abnormality   | SARS-CoV-2 Group      | 1.71                | 1.91                 |        |
|                          | 2019 Comparison Group | 1.27                | 1.41                 |        |
|                          | Risk Difference       | 0.43 (0.03 to 0.84) | 0.5 (0.01 to 0.96)   |        |
|                          | p-value               | <0.001              | 0.11                 | 1      |
| <b>Nephrology</b>        |                       |                     |                      |        |
| Kidney Injury            | SARS-CoV-2 Group      | 6.05                | 7.6                  |        |
|                          | 2019 Comparison Group | 4.6                 | 5.26                 |        |
|                          | Risk Difference       | 1.45 (0.75 to 2.2)  | 2.34 (1.34 to 3.2)   |        |
|                          | p-value               | <0.001              | <0.001               | 0.08   |
| > Chronic Kidney Disease | SARS-CoV-2 Group      | 4.14                | 4.9                  |        |
|                          | 2019 Comparison Group | 3.82                | 4.26                 |        |
|                          | Risk Difference       | 0.32 (-0.4 to 0.93) | 0.64 (-0.27 to 1.46) |        |
|                          | p-value               | 1                   | 1                    | 1      |
| > Acute Kidney Injury    | SARS-CoV-2 Group      | 3.97                | 5.61                 |        |
|                          | 2019 Comparison Group | 2.04                | 2.88                 |        |
|                          | Risk Difference       | 1.93 (1.34 to 2.39) | 2.74 (1.98 to 3.37)  |        |
|                          | p-value               | <0.001              | <0.001               | <0.001 |
| <b>Respiratory</b>       |                       |                     |                      |        |
| Respiratory Failure      | SARS-CoV-2 Group      | 7.58                | 11.07                |        |

|                                  |                       |                       |                      |        |
|----------------------------------|-----------------------|-----------------------|----------------------|--------|
|                                  | 2019 Comparison Group | 1.89                  | 2.32                 |        |
|                                  | Risk Difference       | 5.69 (5.13 to 6.22)   | 8.75 (8.1 to 9.54)   |        |
|                                  | p-value               | <0.001                | <0.001               | <0.001 |
| > Acute Respiratory Failure      | SARS-CoV-2 Group      | 6.7                   | 9.8                  |        |
|                                  | 2019 Comparison Group | 1.37                  | 1.59                 |        |
|                                  | Risk Difference       | 5.33 (4.77 to 5.79)   | 8.22 (7.59 to 8.87)  |        |
|                                  | p-value               | <0.001                | <0.001               | <0.001 |
| > Chronic Respiratory Failure    | SARS-CoV-2 Group      | 1.31                  | 1.58                 |        |
|                                  | 2019 Comparison Group | 0.46                  | 0.47                 |        |
|                                  | Risk Difference       | 0.85 (0.58 to 1.13)   | 1.11 (0.8 to 1.47)   |        |
|                                  | p-value               | <0.001                | <0.001               | 1      |
| > Interstitial Lung Disease      | SARS-CoV-2 Group      | 1.1                   | 1.59                 |        |
|                                  | 2019 Comparison Group | 0.58                  | 0.71                 |        |
|                                  | Risk Difference       | 0.52 (0.26 to 0.76)   | 0.88 (0.54 to 1.24)  |        |
|                                  | p-value               | <0.001                | <0.001               | 0.4    |
| <b>Dermatologic</b>              |                       |                       |                      |        |
| Atopic Dermatitis                | SARS-CoV-2 Group      | 0.3                   | 0.26                 |        |
|                                  | 2019 Comparison Group | 0.32                  | 0.31                 |        |
|                                  | Risk Difference       | -0.02 (-0.17 to 0.13) | -0.05 (-0.21 to 0.1) |        |
|                                  | p-value               | 1                     | 1                    | 1      |
| Urticaria                        | SARS-CoV-2 Group      | 0.22                  | 0.19                 |        |
|                                  | 2019 Comparison Group | 0.29                  | 0.13                 |        |
|                                  | Risk Difference       | -0.06 (-0.21 to 0.06) | 0.06 (-0.05 to 0.19) |        |
|                                  | p-value               | 1                     | 1                    | 1      |
| Herpesviral Vesicular Dermatitis | SARS-CoV-2 Group      | 0.09                  | 0.08                 |        |

|                   |                       |                       |                      |   |
|-------------------|-----------------------|-----------------------|----------------------|---|
|                   | 2019 Comparison Group | 0.05                  | 0.07                 |   |
|                   | Risk Difference       | 0.04 (-0.06 to 0.11)  | 0.02 (-0.07 to 0.1)  |   |
|                   | p-value               | 1                     | 1                    | 1 |
| <b>Others</b>     |                       |                       |                      |   |
| Sleep Apnea       | SARS-CoV-2 Group      | 1.14                  | 1.99                 |   |
|                   | 2019 Comparison Group | 1.19                  | 1.78                 |   |
|                   | Risk Difference       | -0.04 (-0.39 to 0.21) | 0.2 (-0.29 to 0.63)  |   |
|                   | p-value               | 1                     | 1                    | 1 |
| <b>Hematology</b> |                       |                       |                      |   |
| Thrombocytopenia  | SARS-CoV-2 Group      | 0.66                  | 1.28                 |   |
|                   | 2019 Comparison Group | 0.47                  | 0.78                 |   |
|                   | Risk Difference       | 0.19 (0.01 to 0.38)   | 0.49 (0.22 to 0.82)  |   |
|                   | p-value               | <0.001                | <0.001               | 1 |
| Leukopenia        | SARS-CoV-2 Group      | 0.3                   | 0.29                 |   |
|                   | 2019 Comparison Group | 0.12                  | 0.17                 |   |
|                   | Risk Difference       | 0.19 (0.07 to 0.31)   | 0.12 (-0.02 to 0.27) |   |
|                   | p-value               | <0.001                | 0.42                 | 1 |
| Anemia            | SARS-CoV-2 Group      | 3.42                  | 3.29                 |   |
|                   | 2019 Comparison Group | 2.24                  | 2.17                 |   |
|                   | Risk Difference       | 1.18 (0.71 to 1.64)   | 1.12 (0.59 to 1.81)  |   |
|                   | p-value               | <0.001                | <0.001               | 1 |
| <b>Symptom</b>    |                       |                       |                      |   |
| Myalgia           | SARS-CoV-2 Group      | 8.66                  | 6.9                  |   |
|                   | 2019 Comparison Group | 7.97                  | 6.08                 |   |
|                   | Risk Difference       | 0.69 (-0.3 to 1.64)   | 0.82 (-0.19 to 1.91) |   |
|                   | p-value               | 1                     | 0.42                 | 1 |
| Fatigue Diagnosis | SARS-CoV-2 Group      | 11.26                 | 10.36                |   |
|                   | 2019 Comparison Group | 7.11                  | 6.09                 |   |

|                      |                       |                       |                      |   |
|----------------------|-----------------------|-----------------------|----------------------|---|
|                      | Risk Difference       | 4.16 (3.07 to 5.28)   | 4.27 (3.24 to 5.22)  |   |
|                      | p-value               | <0.001                | <0.001               | 1 |
| > Fatigue            | SARS-CoV-2 Group      | 11.06                 | 10.22                |   |
|                      | 2019 Comparison Group | 7.11                  | 6.08                 |   |
|                      | Risk Difference       | 3.95 (2.95 to 5.11)   | 4.14 (2.94 to 5.27)  |   |
|                      | p-value               | <0.001                | <0.001               | 1 |
| > Chronic Fatigue    | SARS-CoV-2 Group      | 0.43                  | 0.32                 |   |
|                      | 2019 Comparison Group | 0.45                  | 0.28                 |   |
|                      | Risk Difference       | -0.01 (-0.19 to 0.15) | 0.04 (-0.14 to 0.2)  |   |
|                      | p-value               | 1                     | 1                    | 1 |
| > Post-viral Fatigue | SARS-CoV-2 Group      | 0.28                  | 0.21                 |   |
|                      | 2019 Comparison Group | 0.02                  | 0.01                 |   |
|                      | Risk Difference       | 0.27 (0.17 to 0.37)   | 0.2 (0.1 to 0.28)    |   |
|                      | p-value               | <0.001                | <0.001               | 1 |
| Anosmia              | SARS-CoV-2 Group      | 0.06                  | 0.06                 |   |
|                      | 2019 Comparison Group | 0.02                  | 0.03                 |   |
|                      | Risk Difference       | 0.05 (0 to 0.11)      | 0.02 (-0.05 to 0.08) |   |
|                      | p-value               | 0.32                  | 1                    | 1 |

Subgroups are subpopulations of the SARS-CoV-2 and 2019 cohort.

Cumulative incidence was obtained by Kaplan-Meier estimator at 120 days after the start of the post-acute phase (141 days after index date).

Confidence intervals were calculated based on Bonferroni correction, i.e.,  $(1 - 0.05/(N \times \text{number of subgroup levels}))$  confidence interval.

Individuals were excluded if they had less than 21 days of observation from the index date, had already been diagnosed with the outcome of interest prior to acute phase, or their matched pair was excluded for the same reasons.

Table 5h: Cumulative Incidence and Risk Difference per 100 Individuals of the SARS-CoV-2 and 2019 Comparison Group for Clinical Sequelae in the Post-Acute Phase by COVID Hospitalization

| Clinical Sequelae               | Category              | Not hospitalized with COVID | Hospitalized with COVID | p-interaction |
|---------------------------------|-----------------------|-----------------------------|-------------------------|---------------|
|                                 | Matched Group Size    | 64194 vs 64194              | 23887 vs 23887          |               |
| <b>Hypertension</b>             |                       |                             |                         |               |
| Hypertension                    | SARS-CoV-2 Group      | 10.53                       | 24.37                   |               |
|                                 | 2019 Comparison Group | 8.82                        | 8.37                    |               |
|                                 | Risk Difference       | 1.71 (-1.33 to 4.59)        | 15.99 (6.6 to 24.92)    |               |
|                                 | p-value               | 1                           | <0.001                  | <0.001        |
| <b>Pulmonary Hypertension</b>   |                       |                             |                         |               |
| Pulmonary Hypertension          | SARS-CoV-2 Group      | 0.75                        | 1.76                    |               |
|                                 | 2019 Comparison Group | 0.68                        | 1.05                    |               |
|                                 | Risk Difference       | 0.07 (-0.18 to 0.28)        | 0.71 (0.2 to 1.15)      |               |
|                                 | p-value               | 1                           | <0.001                  | 1             |
| <b>Cardiology</b>               |                       |                             |                         |               |
| <b>Cardiac Rhythm Disorders</b> |                       |                             |                         |               |
| Cardiac Rhythm Disorders        | SARS-CoV-2 Group      | 3.47                        | 9.4                     |               |
|                                 | 2019 Comparison Group | 2.8                         | 4.18                    |               |
|                                 | Risk Difference       | 0.67 (0.19 to 1.09)         | 5.22 (4.08 to 6.37)     |               |
|                                 | p-value               | <0.001                      | <0.001                  | <0.001        |
| <b>&gt; Cardiac Arrhythmia</b>  |                       |                             |                         |               |
| > Cardiac Arrhythmia            | SARS-CoV-2 Group      | 2.16                        | 4.99                    |               |
|                                 | 2019 Comparison Group | 1.87                        | 2.84                    |               |
|                                 | Risk Difference       | 0.29 (-0.05 to 0.69)        | 2.15 (1.23 to 3.03)     |               |
|                                 | p-value               | 0.32                        | <0.001                  | <0.001        |
| <b>&gt; Tachycardia</b>         |                       |                             |                         |               |
| > Tachycardia                   | SARS-CoV-2 Group      | 1.96                        | 6.32                    |               |
|                                 | 2019 Comparison Group | 1.33                        | 2.06                    |               |
|                                 | Risk Difference       | 0.63 (0.25 to 0.94)         | 4.26 (3.4 to 5.13)      |               |
|                                 | p-value               | <0.001                      | <0.001                  | <0.001        |
| <b>&gt; POTs</b>                |                       |                             |                         |               |
| > POTs                          | SARS-CoV-2 Group      | 0.85                        | 2.07                    |               |



|                                |                       |                      |                     |        |
|--------------------------------|-----------------------|----------------------|---------------------|--------|
|                                | 2019 Comparison Group | 0.72                 | 0.94                |        |
|                                | Risk Difference       | 0.13 (-0.12 to 0.35) | 1.14 (0.61 to 1.66) |        |
|                                | p-value               | 1                    | <0.001              | <0.001 |
| CHF Cardiomyopathy Myocarditis | SARS-CoV-2 Group      | 2.26                 | 6.18                |        |
|                                | 2019 Comparison Group | 1.91                 | 3.06                |        |
|                                | Risk Difference       | 0.35 (-0.04 to 0.72) | 3.12 (2.16 to 4.24) |        |
|                                | p-value               | 0.21                 | <0.001              | <0.001 |
| > Congestive Heart Failure     | SARS-CoV-2 Group      | 1.98                 | 5.44                |        |
|                                | 2019 Comparison Group | 1.62                 | 2.78                |        |
|                                | Risk Difference       | 0.36 (0.02 to 0.67)  | 2.66 (1.84 to 3.9)  |        |
|                                | p-value               | <0.001               | <0.001              | <0.001 |
| > Cardiomyopathy               | SARS-CoV-2 Group      | 0.92                 | 1.89                |        |
|                                | 2019 Comparison Group | 0.79                 | 1.19                |        |
|                                | Risk Difference       | 0.13 (-0.11 to 0.32) | 0.7 (0.14 to 1.22)  |        |
|                                | p-value               | 1                    | <0.001              | 1      |
| > Myocarditis                  | SARS-CoV-2 Group      | 0.02                 | 0.11                |        |
|                                | 2019 Comparison Group | 0.01                 | 0.01                |        |
|                                | Risk Difference       | 0.01 (-0.02 to 0.03) | 0.1 (0.01 to 0.21)  |        |
|                                | p-value               | 1                    | <0.001              | 0.01   |
| Coronary Disease               | SARS-CoV-2 Group      | 1.19                 | 3.28                |        |
|                                | 2019 Comparison Group | 0.95                 | 1.52                |        |
|                                | Risk Difference       | 0.24 (0.02 to 0.45)  | 1.76 (1.03 to 2.36) |        |
|                                | p-value               | <0.001               | <0.001              | <0.001 |
| > Myocardial Infarction        | SARS-CoV-2 Group      | 0.95                 | 2.74                |        |
|                                | 2019 Comparison Group | 0.74                 | 1.25                |        |
|                                | Risk Difference       | 0.21 (0.01 to 0.43)  | 1.5 (0.95 to 2.13)  |        |

|                               |                       |                      |                     |        |
|-------------------------------|-----------------------|----------------------|---------------------|--------|
|                               | p-value               | <0.001               | <0.001              | <0.001 |
| > Acute Coronary Syndrome     | SARS-CoV-2 Group      | 1.18                 | 3.23                |        |
|                               | 2019 Comparison Group | 0.95                 | 1.51                |        |
|                               | Risk Difference       | 0.23 (-0.04 to 0.53) | 1.71 (1.12 to 2.35) |        |
|                               | p-value               | 0.11                 | <0.001              | <0.001 |
| Cardiogenic Shock             | SARS-CoV-2 Group      | 0.1                  | 0.25                |        |
|                               | 2019 Comparison Group | 0.09                 | 0.06                |        |
|                               | Risk Difference       | 0.01 (-0.06 to 0.09) | 0.19 (0.06 to 0.36) |        |
|                               | p-value               | 1                    | <0.001              | 0.23   |
| Hypercoagulability DVT PE PAO | SARS-CoV-2 Group      | 2.2                  | 7.45                |        |
|                               | 2019 Comparison Group | 1.49                 | 2.02                |        |
|                               | Risk Difference       | 0.71 (0.39 to 1.05)  | 5.43 (4.61 to 6.17) |        |
|                               | p-value               | <0.001               | <0.001              | <0.001 |
| > Hypercoagulability          | SARS-CoV-2 Group      | 1.63                 | 4.89                |        |
|                               | 2019 Comparison Group | 1.11                 | 1.45                |        |
|                               | Risk Difference       | 0.52 (0.26 to 0.83)  | 3.44 (2.79 to 4.12) |        |
|                               | p-value               | <0.001               | <0.001              | <0.001 |
| > Deep Vein Thrombosis        | SARS-CoV-2 Group      | 1.06                 | 3.67                |        |
|                               | 2019 Comparison Group | 0.6                  | 0.83                |        |
|                               | Risk Difference       | 0.46 (0.21 to 0.66)  | 2.85 (2.25 to 3.41) |        |
|                               | p-value               | <0.001               | <0.001              | <0.001 |
| > Pulmonary Embolism          | SARS-CoV-2 Group      | 0.63                 | 3.05                |        |
|                               | 2019 Comparison Group | 0.32                 | 0.51                |        |
|                               | Risk Difference       | 0.3 (0.14 to 0.48)   | 2.54 (2 to 2.99)    |        |
|                               | p-value               | <0.001               | <0.001              | <0.001 |

|                                   |                       |                      |                     |        |
|-----------------------------------|-----------------------|----------------------|---------------------|--------|
| > Peripheral Arterial Occlusions  | SARS-CoV-2 Group      | 0.31                 | 0.76                |        |
|                                   | 2019 Comparison Group | 0.24                 | 0.34                |        |
|                                   | Risk Difference       | 0.07 (-0.05 to 0.19) | 0.42 (0.15 to 0.75) |        |
|                                   | p-value               | 1                    | <0.001              | 1      |
| Stroke and Sequelae               | SARS-CoV-2 Group      | 1.58                 | 4.52                |        |
|                                   | 2019 Comparison Group | 1.51                 | 2.17                |        |
|                                   | Risk Difference       | 0.07 (-0.22 to 0.35) | 2.35 (1.42 to 3.14) |        |
|                                   | p-value               | 1                    | <0.001              | <0.001 |
| > Ischemic Stroke and Sequelae    | SARS-CoV-2 Group      | 1.37                 | 4.15                |        |
|                                   | 2019 Comparison Group | 1.34                 | 1.86                |        |
|                                   | Risk Difference       | 0.04 (-0.25 to 0.3)  | 2.29 (1.52 to 3.08) |        |
|                                   | p-value               | 1                    | <0.001              | <0.001 |
| > Hemorrhagic Stroke and Sequelae | SARS-CoV-2 Group      | 1.02                 | 2.5                 |        |
|                                   | 2019 Comparison Group | 0.82                 | 1.47                |        |
|                                   | Risk Difference       | 0.2 (-0.04 to 0.43)  | 1.03 (0.57 to 1.62) |        |
|                                   | p-value               | 0.42                 | <0.001              | <0.001 |
| <b>Mental Health</b>              |                       |                      |                     |        |
| Mental Health Diagnosis           | SARS-CoV-2 Group      | 5.19                 | 8.3                 |        |
|                                   | 2019 Comparison Group | 4.07                 | 4.75                |        |
|                                   | Risk Difference       | 1.12 (0.53 to 1.75)  | 3.55 (2.12 to 4.98) |        |
|                                   | p-value               | <0.001               | <0.001              | 0.02   |
| Psychosis                         | SARS-CoV-2 Group      | 0.25                 | 0.73                |        |
|                                   | 2019 Comparison Group | 0.21                 | 0.26                |        |
|                                   | Risk Difference       | 0.04 (-0.08 to 0.15) | 0.47 (0.2 to 0.8)   |        |
|                                   | p-value               | 1                    | <0.001              | <0.001 |

|                           |                       |                       |                       |        |
|---------------------------|-----------------------|-----------------------|-----------------------|--------|
| <b>Neurologic</b>         |                       |                       |                       |        |
| Amnesia/Memory Difficulty | SARS-CoV-2 Group      | 3.62                  | 10.88                 |        |
|                           | 2019 Comparison Group | 3.08                  | 4.49                  |        |
|                           | Risk Difference       | 0.55 (-0.01 to 1.12)  | 6.39 (5.2 to 7.75)    |        |
|                           | p-value               | 0.11                  | <0.001                | <0.001 |
| Migraine                  | SARS-CoV-2 Group      | 0.33                  | 0.18                  |        |
|                           | 2019 Comparison Group | 0.33                  | 0.23                  |        |
|                           | Risk Difference       | -0.01 (-0.13 to 0.13) | -0.05 (-0.25 to 0.19) |        |
|                           | p-value               | 1                     | 1                     | 1      |
| Peripheral Neuropathy     | SARS-CoV-2 Group      | 0.85                  | 1.18                  |        |
|                           | 2019 Comparison Group | 1.1                   | 1.13                  |        |
|                           | Risk Difference       | -0.25 (-0.53 to 0)    | 0.05 (-0.37 to 0.55)  |        |
|                           | p-value               | 1                     | 1                     | 1      |
| Encephalopathy            | SARS-CoV-2 Group      | 1.51                  | 7.11                  |        |
|                           | 2019 Comparison Group | 1.07                  | 2                     |        |
|                           | Risk Difference       | 0.44 (0.16 to 0.7)    | 5.11 (4.26 to 5.91)   |        |
|                           | p-value               | <0.001                | <0.001                | <0.001 |
| Seizure                   | SARS-CoV-2 Group      | 0.38                  | 0.96                  |        |
|                           | 2019 Comparison Group | 0.35                  | 0.48                  |        |
|                           | Risk Difference       | 0.02 (-0.13 to 0.16)  | 0.48 (0.16 to 0.89)   |        |
|                           | p-value               | 1                     | <0.001                | 0.01   |
| Dementia                  | SARS-CoV-2 Group      | 2.06                  | 5.22                  |        |
|                           | 2019 Comparison Group | 1.35                  | 2.21                  |        |
|                           | Risk Difference       | 0.71 (0.4 to 1.06)    | 3 (1.93 to 4.08)      |        |
|                           | p-value               | <0.001                | <0.001                | <0.001 |
| Guillain-Barre Syndrome   | SARS-CoV-2 Group      | 0.01                  | 0.05                  |        |

|                          |                       |                     |                     |        |
|--------------------------|-----------------------|---------------------|---------------------|--------|
|                          | 2019 Comparison Group | 0                   | 0                   |        |
|                          | Risk Difference       | 0.01 (0 to 0.03)    | 0.05 (0 to 0.16)    |        |
|                          | p-value               | <0.001              | <0.001              | 0.28   |
| <b>Diabetes</b>          |                       |                     |                     |        |
| Type 2 Diabetes          | SARS-CoV-2 Group      | 2.24                | 4.97                |        |
|                          | 2019 Comparison Group | 1.6                 | 1.64                |        |
|                          | Risk Difference       | 0.64 (0.15 to 1.19) | 3.33 (2.1 to 4.59)  |        |
|                          | p-value               | <0.001              | <0.001              | <0.001 |
| <b>Liver</b>             |                       |                     |                     |        |
| Liver Test Abnormality   | SARS-CoV-2 Group      | 1.68                | 2.5                 |        |
|                          | 2019 Comparison Group | 1.37                | 1.3                 |        |
|                          | Risk Difference       | 0.32 (0.01 to 0.62) | 1.2 (0.61 to 1.79)  |        |
|                          | p-value               | <0.001              | <0.001              | 1      |
| <b>Nephrology</b>        |                       |                     |                     |        |
| Kidney Injury            | SARS-CoV-2 Group      | 4.92                | 13.09               |        |
|                          | 2019 Comparison Group | 4.65                | 6.01                |        |
|                          | Risk Difference       | 0.28 (-0.4 to 0.93) | 7.08 (5.31 to 8.71) |        |
|                          | p-value               | 1                   | <0.001              | <0.001 |
| > Chronic Kidney Disease | SARS-CoV-2 Group      | 3.73                | 6.84                |        |
|                          | 2019 Comparison Group | 3.73                | 4.8                 |        |
|                          | Risk Difference       | 0 (-0.56 to 0.52)   | 2.03 (0.58 to 3.4)  |        |
|                          | p-value               | 1                   | <0.001              | 0.002  |
| > Acute Kidney Injury    | SARS-CoV-2 Group      | 2.6                 | 11.14               |        |
|                          | 2019 Comparison Group | 2.24                | 3.4                 |        |
|                          | Risk Difference       | 0.36 (0.02 to 0.76) | 7.75 (6.57 to 8.92) |        |
|                          | p-value               | <0.001              | <0.001              | <0.001 |
| <b>Respiratory</b>       |                       |                     |                     |        |
| Respiratory Failure      | SARS-CoV-2 Group      | 3.61                | 25.81               |        |

|                                  |                       |                       |                        |        |
|----------------------------------|-----------------------|-----------------------|------------------------|--------|
|                                  | 2019 Comparison Group | 1.72                  | 2.76                   |        |
|                                  | Risk Difference       | 1.89 (1.51 to 2.25)   | 23.05 (21.74 to 24.41) |        |
|                                  | p-value               | <0.001                | <0.001                 | <0.001 |
| > Acute Respiratory Failure      | SARS-CoV-2 Group      | 2.8                   | 23.41                  |        |
|                                  | 2019 Comparison Group | 1.21                  | 2.1                    |        |
|                                  | Risk Difference       | 1.59 (1.22 to 1.9)    | 21.31 (20.08 to 22.27) |        |
|                                  | p-value               | <0.001                | <0.001                 | <0.001 |
| > Chronic Respiratory Failure    | SARS-CoV-2 Group      | 0.67                  | 3.62                   |        |
|                                  | 2019 Comparison Group | 0.39                  | 0.6                    |        |
|                                  | Risk Difference       | 0.28 (0.12 to 0.46)   | 3.02 (2.55 to 3.61)    |        |
|                                  | p-value               | <0.001                | <0.001                 | <0.001 |
| > Interstitial Lung Disease      | SARS-CoV-2 Group      | 0.85                  | 2.96                   |        |
|                                  | 2019 Comparison Group | 0.54                  | 0.79                   |        |
|                                  | Risk Difference       | 0.3 (0.13 to 0.51)    | 2.16 (1.57 to 2.73)    |        |
|                                  | p-value               | <0.001                | <0.001                 | <0.001 |
| <b>Dermatologic</b>              |                       |                       |                        |        |
| Atopic Dermatitis                | SARS-CoV-2 Group      | 0.24                  | 0.28                   |        |
|                                  | 2019 Comparison Group | 0.3                   | 0.29                   |        |
|                                  | Risk Difference       | -0.06 (-0.2 to 0.07)  | -0.02 (-0.24 to 0.27)  |        |
|                                  | p-value               | 1                     | 1                      | 1      |
| Urticaria                        | SARS-CoV-2 Group      | 0.16                  | 0.29                   |        |
|                                  | 2019 Comparison Group | 0.24                  | 0.17                   |        |
|                                  | Risk Difference       | -0.08 (-0.17 to 0.03) | 0.11 (-0.07 to 0.33)   |        |
|                                  | p-value               | 1                     | 1                      | 1      |
| Herpesviral Vesicular Dermatitis | SARS-CoV-2 Group      | 0.09                  | 0.11                   |        |

|                   |                       |                      |                      |        |
|-------------------|-----------------------|----------------------|----------------------|--------|
|                   | 2019 Comparison Group | 0.05                 | 0.05                 |        |
|                   | Risk Difference       | 0.04 (-0.02 to 0.1)  | 0.06 (-0.07 to 0.18) |        |
|                   | p-value               | 1                    | 1                    | 1      |
| <b>Others</b>     |                       |                      |                      |        |
| Sleep Apnea       | SARS-CoV-2 Group      | 1.33                 | 2.37                 |        |
|                   | 2019 Comparison Group | 1.31                 | 1.54                 |        |
|                   | Risk Difference       | 0.02 (-0.27 to 0.3)  | 0.82 (0.19 to 1.41)  |        |
|                   | p-value               | 1                    | <0.001               | 1      |
| <b>Hematology</b> |                       |                      |                      |        |
| Thrombocytopenia  | SARS-CoV-2 Group      | 0.63                 | 1.58                 |        |
|                   | 2019 Comparison Group | 0.56                 | 0.83                 |        |
|                   | Risk Difference       | 0.07 (-0.13 to 0.28) | 0.75 (0.31 to 1.13)  |        |
|                   | p-value               | 1                    | <0.001               | <0.001 |
| Leukopenia        | SARS-CoV-2 Group      | 0.21                 | 0.45                 |        |
|                   | 2019 Comparison Group | 0.13                 | 0.14                 |        |
|                   | Risk Difference       | 0.09 (-0.03 to 0.18) | 0.31 (0.12 to 0.55)  |        |
|                   | p-value               | 0.21                 | <0.001               | 0.28   |
| Anemia            | SARS-CoV-2 Group      | 2.67                 | 5.66                 |        |
|                   | 2019 Comparison Group | 1.98                 | 2.75                 |        |
|                   | Risk Difference       | 0.69 (0.3 to 1.04)   | 2.91 (1.71 to 3.9)   |        |
|                   | p-value               | <0.001               | <0.001               | 0.001  |
| <b>Symptom</b>    |                       |                      |                      |        |
| Myalgia           | SARS-CoV-2 Group      | 7.4                  | 10.98                |        |
|                   | 2019 Comparison Group | 6.89                 | 7.17                 |        |
|                   | Risk Difference       | 0.51 (-0.26 to 1.35) | 3.82 (2.15 to 5.62)  |        |
|                   | p-value               | 1                    | <0.001               | 1      |
| Fatigue Diagnosis | SARS-CoV-2 Group      | 8                    | 20.89                |        |
|                   | 2019 Comparison Group | 5.99                 | 7.42                 |        |

|                      |                       |                      |                        |        |
|----------------------|-----------------------|----------------------|------------------------|--------|
|                      | Risk Difference       | 2.01 (1.29 to 2.76)  | 13.47 (11.93 to 15.37) |        |
|                      | p-value               | <0.001               | <0.001                 | <0.001 |
| > Fatigue            | SARS-CoV-2 Group      | 7.9                  | 20.57                  |        |
|                      | 2019 Comparison Group | 5.99                 | 7.41                   |        |
|                      | Risk Difference       | 1.92 (1.14 to 2.61)  | 13.17 (11.31 to 15.21) |        |
|                      | p-value               | <0.001               | <0.001                 | <0.001 |
| > Chronic Fatigue    | SARS-CoV-2 Group      | 0.33                 | 0.51                   |        |
|                      | 2019 Comparison Group | 0.3                  | 0.36                   |        |
|                      | Risk Difference       | 0.02 (-0.15 to 0.16) | 0.15 (-0.15 to 0.43)   |        |
|                      | p-value               | 1                    | 1                      | 1      |
| > Post-viral Fatigue | SARS-CoV-2 Group      | 0.18                 | 0.4                    |        |
|                      | 2019 Comparison Group | 0.03                 | 0.03                   |        |
|                      | Risk Difference       | 0.15 (0.08 to 0.24)  | 0.37 (0.21 to 0.55)    |        |
|                      | p-value               | <0.001               | <0.001                 | 0.01   |
| Anosmia              | SARS-CoV-2 Group      | 0.07                 | 0.08                   |        |
|                      | 2019 Comparison Group | 0.01                 | 0.02                   |        |
|                      | Risk Difference       | 0.06 (0.01 to 0.12)  | 0.06 (-0.04 to 0.17)   |        |
|                      | p-value               | <0.001               | 1                      | 1      |

Subgroups are subpopulations of the SARS-CoV-2 and 2019 cohorts.

Hospitalized with COVID subpopulation compares SARS-CoV-2 infected individuals hospitalized due to COVID and individuals within the 2019 comparison group. Meanwhile, Not hospitalized with COVID subpopulation compares SARS-CoV-2 infected individuals not hospitalized due to COVID and individuals within the 2019 comparison group.

Cumulative incidence was obtained by Kaplan-Meier estimator at 120 days after the start of the post-acute phase (141 days after index date).

Confidence intervals were calculated based on Bonferroni correction, i.e.,  $(1 - 0.05/(N \times \text{number of subgroup levels}))$  confidence interval.

Individuals were excluded if they had less than 21 days of observation from the index date, had already been diagnosed with the outcome of interest prior to acute phase, or their matched pair was excluded for the same reasons.



Table 5i: Cumulative Incidence and Risk Difference per 100 Individuals of the SARS-CoV-2 and Viral LRTI Comparison Group for Clinical Sequelae in the Post-Acute Phase by Age

| Clinical Sequelae              | Category                    | 65–74                 | >74                    | p-interaction |
|--------------------------------|-----------------------------|-----------------------|------------------------|---------------|
|                                | Matched Group Size          | 31,793 vs 31,793      | 40,937 vs 40,937       |               |
| <b>Hypertension</b>            |                             |                       |                        |               |
| Hypertension                   | SARS-CoV-2 Group            | 11.96                 | 15.28                  |               |
|                                | Viral LRTI Comparison Group | 11.1                  | 19.22                  |               |
|                                | Risk Difference             | 0.86 (-3.06 to 5.01)  | -3.94 (-11.95 to 2.38) |               |
|                                | p-value                     | 1                     | 1                      | 0.35          |
| <b>Pulmonary Hypertension</b>  |                             |                       |                        |               |
| Pulmonary Hypertension         | SARS-CoV-2 Group            | 0.73                  | 1.2                    |               |
|                                | Viral LRTI Comparison Group | 1.02                  | 1.81                   |               |
|                                | Risk Difference             | -0.3 (-0.59 to 0.04)  | -0.62 (-1 to -0.26)    |               |
|                                | p-value                     | 1                     | 1                      | 1             |
| <b>Cardiology</b>              |                             |                       |                        |               |
| Cardiac Rhythm Disorders       | SARS-CoV-2 Group            | 3.88                  | 5.78                   |               |
|                                | Viral LRTI Comparison Group | 4.18                  | 6.38                   |               |
|                                | Risk Difference             | -0.29 (-0.93 to 0.36) | -0.6 (-1.57 to 0.07)   |               |
|                                | p-value                     | 1                     | 1                      | 0.59          |
| <b>&gt; Cardiac Arrhythmia</b> |                             |                       |                        |               |
| > Cardiac Arrhythmia           | SARS-CoV-2 Group            | 2.18                  | 3.52                   |               |
|                                | Viral LRTI Comparison Group | 2.38                  | 4.09                   |               |
|                                | Risk Difference             | -0.2 (-0.71 to 0.27)  | -0.57 (-1.3 to 0.08)   |               |
|                                | p-value                     | 1                     | 1                      | 0.07          |
| <b>&gt; Tachycardia</b>        |                             |                       |                        |               |
| > Tachycardia                  | SARS-CoV-2 Group            | 2.54                  | 3.27                   |               |
|                                | Viral LRTI Comparison Group | 2.77                  | 3.29                   |               |
|                                | Risk Difference             | -0.24 (-0.78 to 0.29) | -0.02 (-0.54 to 0.49)  |               |
|                                | p-value                     | 1                     | 1                      | 1             |
| <b>&gt; POTs</b>               |                             |                       |                        |               |
| > POTs                         | SARS-CoV-2 Group            | 0.93                  | 1.3                    |               |

|                                |                             |                        |                       |        |
|--------------------------------|-----------------------------|------------------------|-----------------------|--------|
|                                | Viral LRTI Comparison Group | 0.86                   | 1.51                  |        |
|                                | Risk Difference             | 0.07 (-0.21 to 0.37)   | -0.22 (-0.56 to 0.12) |        |
|                                | p-value                     | 1                      | 1                     | 0.19   |
| CHF Cardiomyopathy Myocarditis | SARS-CoV-2 Group            | 2.23                   | 3.97                  |        |
|                                | Viral LRTI Comparison Group | 3.93                   | 7.85                  |        |
|                                | Risk Difference             | -1.7 (-2.26 to -1.08)  | -3.87 (-4.5 to -3.11) |        |
|                                | p-value                     | 1                      | 1                     | <0.001 |
| > Congestive Heart Failure     | SARS-CoV-2 Group            | 1.87                   | 3.62                  |        |
|                                | Viral LRTI Comparison Group | 3.29                   | 7.14                  |        |
|                                | Risk Difference             | -1.42 (-1.88 to -0.9)  | -3.52 (-4.2 to -2.82) |        |
|                                | p-value                     | 1                      | 1                     | <0.001 |
| > Cardiomyopathy               | SARS-CoV-2 Group            | 0.88                   | 1.21                  |        |
|                                | Viral LRTI Comparison Group | 1.71                   | 2.01                  |        |
|                                | Risk Difference             | -0.82 (-1.17 to -0.47) | -0.8 (-1.17 to -0.47) |        |
|                                | p-value                     | 1                      | 1                     | 1      |
| > Myocarditis                  | SARS-CoV-2 Group            | 0.04                   | 0.03                  |        |
|                                | Viral LRTI Comparison Group | 0.01                   | 0.02                  |        |
|                                | Risk Difference             | 0.03 (-0.02 to 0.1)    | 0.02 (-0.03 to 0.06)  |        |
|                                | p-value                     | 1                      | 1                     | 1      |
| Coronary Disease               | SARS-CoV-2 Group            | 1.36                   | 1.88                  |        |
|                                | Viral LRTI Comparison Group | 1.78                   | 2.58                  |        |
|                                | Risk Difference             | -0.43 (-0.84 to 0.03)  | -0.7 (-1.12 to -0.25) |        |
|                                | p-value                     | 1                      | 1                     | 0.43   |
| > Myocardial Infarction        | SARS-CoV-2 Group            | 1.06                   | 1.56                  |        |
|                                | Viral LRTI Comparison Group | 1.41                   | 2.21                  |        |
|                                | Risk Difference             | -0.34 (-0.7 to 0.01)   | -0.65 (-1.1 to -0.26) |        |

|                               |                             |                        |                        |      |
|-------------------------------|-----------------------------|------------------------|------------------------|------|
|                               | p-value                     | 1                      | 1                      | 0.85 |
| > Acute Coronary Syndrome     | SARS-CoV-2 Group            | 1.34                   | 1.87                   |      |
|                               | Viral LRTI Comparison Group | 1.78                   | 2.58                   |      |
|                               | Risk Difference             | -0.44 (-0.81 to -0.05) | -0.7 (-1.1 to -0.3)    |      |
|                               | p-value                     | 1                      | 1                      | 0.49 |
| Cardiogenic Shock             | SARS-CoV-2 Group            | 0.14                   | 0.11                   |      |
|                               | Viral LRTI Comparison Group | 0.22                   | 0.3                    |      |
|                               | Risk Difference             | -0.09 (-0.21 to 0.04)  | -0.19 (-0.33 to -0.08) |      |
|                               | p-value                     | 1                      | 1                      | 1    |
| Hypercoagulability DVT PE PAO | SARS-CoV-2 Group            | 2.8                    | 3.91                   |      |
|                               | Viral LRTI Comparison Group | 2.52                   | 3.81                   |      |
|                               | Risk Difference             | 0.28 (-0.19 to 0.85)   | 0.11 (-0.47 to 0.62)   |      |
|                               | p-value                     | 1                      | 1                      | 1    |
| > Hypercoagulability          | SARS-CoV-2 Group            | 1.96                   | 2.75                   |      |
|                               | Viral LRTI Comparison Group | 1.76                   | 2.77                   |      |
|                               | Risk Difference             | 0.2 (-0.22 to 0.68)    | -0.02 (-0.51 to 0.49)  |      |
|                               | p-value                     | 1                      | 1                      | 1    |
| > Deep Vein Thrombosis        | SARS-CoV-2 Group            | 1.41                   | 1.85                   |      |
|                               | Viral LRTI Comparison Group | 1.27                   | 1.87                   |      |
|                               | Risk Difference             | 0.14 (-0.22 to 0.47)   | -0.03 (-0.4 to 0.31)   |      |
|                               | p-value                     | 1                      | 1                      | 1    |
| > Pulmonary Embolism          | SARS-CoV-2 Group            | 1.01                   | 1.38                   |      |
|                               | Viral LRTI Comparison Group | 0.91                   | 1.22                   |      |
|                               | Risk Difference             | 0.1 (-0.18 to 0.45)    | 0.16 (-0.15 to 0.49)   |      |
|                               | p-value                     | 1                      | 1                      | 1    |

|                                   |                             |                       |                        |      |
|-----------------------------------|-----------------------------|-----------------------|------------------------|------|
| > Peripheral Arterial Occlusions  | SARS-CoV-2 Group            | 0.39                  | 0.45                   |      |
|                                   | Viral LRTI Comparison Group | 0.4                   | 0.51                   |      |
|                                   | Risk Difference             | -0.01 (-0.24 to 0.21) | -0.06 (-0.25 to 0.17)  |      |
|                                   | p-value                     | 1                     | 1                      | 1    |
| Stroke and Sequelae               | SARS-CoV-2 Group            | 1.68                  | 2.96                   |      |
|                                   | Viral LRTI Comparison Group | 1.92                  | 3.69                   |      |
|                                   | Risk Difference             | -0.24 (-0.63 to 0.17) | -0.74 (-1.23 to -0.1)  |      |
|                                   | p-value                     | 1                     | 1                      | 0.08 |
| > Ischemic Stroke and Sequelae    | SARS-CoV-2 Group            | 1.52                  | 2.61                   |      |
|                                   | Viral LRTI Comparison Group | 1.74                  | 3.3                    |      |
|                                   | Risk Difference             | -0.22 (-0.58 to 0.19) | -0.69 (-1.18 to -0.23) |      |
|                                   | p-value                     | 1                     | 1                      | 0.11 |
| > Hemorrhagic Stroke and Sequelae | SARS-CoV-2 Group            | 1.03                  | 1.83                   |      |
|                                   | Viral LRTI Comparison Group | 1.12                  | 2.29                   |      |
|                                   | Risk Difference             | -0.08 (-0.43 to 0.26) | -0.46 (-0.83 to 0.12)  |      |
|                                   | p-value                     | 1                     | 1                      | 0.39 |
| <b>Mental Health</b>              |                             |                       |                        |      |
| Mental Health Diagnosis           | SARS-CoV-2 Group            | 5.33                  | 6.41                   |      |
|                                   | Viral LRTI Comparison Group | 5.3                   | 6.14                   |      |
|                                   | Risk Difference             | 0.03 (-0.98 to 0.95)  | 0.27 (-0.62 to 1.2)    |      |
|                                   | p-value                     | 1                     | 1                      | 1    |
| Psychosis                         | SARS-CoV-2 Group            | 0.27                  | 0.41                   |      |
|                                   | Viral LRTI Comparison Group | 0.18                  | 0.4                    |      |
|                                   | Risk Difference             | 0.09 (-0.05 to 0.24)  | 0.01 (-0.16 to 0.24)   |      |
|                                   | p-value                     | 1                     | 1                      | 1    |

|                           |                             |                       |                        |       |
|---------------------------|-----------------------------|-----------------------|------------------------|-------|
| <b>Neurologic</b>         |                             |                       |                        |       |
| Amnesia/Memory Difficulty | SARS-CoV-2 Group            | 3.15                  | 7.83                   |       |
|                           | Viral LRTI Comparison Group | 2.93                  | 7.81                   |       |
|                           | Risk Difference             | 0.22 (-0.32 to 0.76)  | 0.02 (-0.84 to 0.97)   |       |
|                           | p-value                     | 1                     | 1                      | 1     |
| Migraine                  | SARS-CoV-2 Group            | 0.4                   | 0.23                   |       |
|                           | Viral LRTI Comparison Group | 0.48                  | 0.28                   |       |
|                           | Risk Difference             | -0.08 (-0.31 to 0.12) | -0.05 (-0.2 to 0.09)   |       |
|                           | p-value                     | 1                     | 1                      | 1     |
| Peripheral Neuropathy     | SARS-CoV-2 Group            | 0.91                  | 0.96                   |       |
|                           | Viral LRTI Comparison Group | 0.99                  | 1.32                   |       |
|                           | Risk Difference             | -0.08 (-0.39 to 0.23) | -0.36 (-0.67 to -0.03) |       |
|                           | p-value                     | 1                     | 1                      | 1     |
| Encephalopathy            | SARS-CoV-2 Group            | 1.82                  | 3.75                   |       |
|                           | Viral LRTI Comparison Group | 1.5                   | 3.52                   |       |
|                           | Risk Difference             | 0.33 (0 to 0.77)      | 0.23 (-0.41 to 0.72)   |       |
|                           | p-value                     | 0.21                  | 1                      | 1     |
| Seizure                   | SARS-CoV-2 Group            | 0.42                  | 0.62                   |       |
|                           | Viral LRTI Comparison Group | 0.43                  | 0.69                   |       |
|                           | Risk Difference             | 0 (-0.22 to 0.22)     | -0.07 (-0.31 to 0.16)  |       |
|                           | p-value                     | 1                     | 1                      | 1     |
| Dementia                  | SARS-CoV-2 Group            | 0.97                  | 5.07                   |       |
|                           | Viral LRTI Comparison Group | 0.78                  | 4.04                   |       |
|                           | Risk Difference             | 0.19 (-0.11 to 0.56)  | 1.03 (0.22 to 1.72)    |       |
|                           | p-value                     | 1                     | <0.001                 | 0.004 |
| Guillain-Barre Syndrome   | SARS-CoV-2 Group            | 0.03                  | 0.02                   |       |

|                          |                             |                       |                        |   |
|--------------------------|-----------------------------|-----------------------|------------------------|---|
|                          | Viral LRTI Comparison Group | 0.02                  | 0.03                   |   |
|                          | Risk Difference             | 0.01 (-0.03 to 0.07)  | -0.01 (-0.05 to 0.03)  |   |
|                          | p-value                     | 1                     | 1                      | 1 |
| <b>Diabetes</b>          |                             |                       |                        |   |
| Type 2 Diabetes          | SARS-CoV-2 Group            | 3                     | 3.06                   |   |
|                          | Viral LRTI Comparison Group | 2.36                  | 2.8                    |   |
|                          | Risk Difference             | 0.65 (-0.1 to 1.47)   | 0.26 (-0.47 to 0.98)   |   |
|                          | p-value                     | 0.53                  | 1                      | 1 |
| <b>Liver</b>             |                             |                       |                        |   |
| Liver Test Abnormality   | SARS-CoV-2 Group            | 2.1                   | 1.42                   |   |
|                          | Viral LRTI Comparison Group | 2.19                  | 1.97                   |   |
|                          | Risk Difference             | -0.1 (-0.66 to 0.37)  | -0.55 (-0.94 to -0.15) |   |
|                          | p-value                     | 1                     | 1                      | 1 |
| <b>Nephrology</b>        |                             |                       |                        |   |
| Kidney Injury            | SARS-CoV-2 Group            | 4.85                  | 9.02                   |   |
|                          | Viral LRTI Comparison Group | 4.9                   | 9.01                   |   |
|                          | Risk Difference             | -0.05 (-0.97 to 0.79) | 0.01 (-1.06 to 1.25)   |   |
|                          | p-value                     | 1                     | 1                      | 1 |
| > Chronic Kidney Disease | SARS-CoV-2 Group            | 3.09                  | 6.07                   |   |
|                          | Viral LRTI Comparison Group | 3.64                  | 6.29                   |   |
|                          | Risk Difference             | -0.55 (-1.13 to 0.16) | -0.22 (-1.17 to 0.83)  |   |
|                          | p-value                     | 1                     | 1                      | 1 |
| > Acute Kidney Injury    | SARS-CoV-2 Group            | 3.3                   | 5.8                    |   |
|                          | Viral LRTI Comparison Group | 3.55                  | 6.44                   |   |
|                          | Risk Difference             | -0.25 (-0.87 to 0.38) | -0.65 (-1.54 to 0.04)  |   |
|                          | p-value                     | 1                     | 1                      | 1 |
| <b>Respiratory</b>       |                             |                       |                        |   |
| Respiratory Failure      | SARS-CoV-2 Group            | 7.6                   | 10.26                  |   |

|                                  |                             |                       |                        |       |
|----------------------------------|-----------------------------|-----------------------|------------------------|-------|
|                                  | Viral LRTI Comparison Group | 4.96                  | 7.97                   |       |
|                                  | Risk Difference             | 2.64 (1.88 to 3.49)   | 2.28 (1.37 to 3.06)    |       |
|                                  | p-value                     | <0.001                | <0.001                 | 0.02  |
| > Acute Respiratory Failure      | SARS-CoV-2 Group            | 6.84                  | 9                      |       |
|                                  | Viral LRTI Comparison Group | 3.57                  | 5.75                   |       |
|                                  | Risk Difference             | 3.27 (2.56 to 3.85)   | 3.25 (2.55 to 3.86)    |       |
|                                  | p-value                     | <0.001                | <0.001                 | 0.17  |
| > Chronic Respiratory Failure    | SARS-CoV-2 Group            | 1.29                  | 1.51                   |       |
|                                  | Viral LRTI Comparison Group | 1.5                   | 2.18                   |       |
|                                  | Risk Difference             | -0.2 (-0.61 to 0.19)  | -0.67 (-1.08 to -0.26) |       |
|                                  | p-value                     | 1                     | 1                      | 0.59  |
| > Interstitial Lung Disease      | SARS-CoV-2 Group            | 1.14                  | 1.48                   |       |
|                                  | Viral LRTI Comparison Group | 1.37                  | 2.05                   |       |
|                                  | Risk Difference             | -0.23 (-0.6 to 0.15)  | -0.57 (-0.91 to -0.18) |       |
|                                  | p-value                     | 1                     | 1                      | 0.005 |
| <b>Dermatologic</b>              |                             |                       |                        |       |
| Atopic Dermatitis                | SARS-CoV-2 Group            | 0.25                  | 0.27                   |       |
|                                  | Viral LRTI Comparison Group | 0.32                  | 0.34                   |       |
|                                  | Risk Difference             | -0.07 (-0.27 to 0.1)  | -0.07 (-0.25 to 0.11)  |       |
|                                  | p-value                     | 1                     | 1                      | 1     |
| Urticaria                        | SARS-CoV-2 Group            | 0.24                  | 0.15                   |       |
|                                  | Viral LRTI Comparison Group | 0.3                   | 0.21                   |       |
|                                  | Risk Difference             | -0.05 (-0.23 to 0.11) | -0.06 (-0.18 to 0.08)  |       |
|                                  | p-value                     | 1                     | 1                      | 1     |
| Herpesviral Vesicular Dermatitis | SARS-CoV-2 Group            | 0.07                  | 0.09                   |       |

|                   |                             |                       |                       |   |
|-------------------|-----------------------------|-----------------------|-----------------------|---|
|                   | Viral LRTI Comparison Group | 0.07                  | 0.06                  |   |
|                   | Risk Difference             | 0 (-0.09 to 0.1)      | 0.04 (-0.04 to 0.12)  |   |
|                   | p-value                     | 1                     | 1                     | 1 |
| <b>Others</b>     |                             |                       |                       |   |
| Sleep Apnea       | SARS-CoV-2 Group            | 1.78                  | 1.06                  |   |
|                   | Viral LRTI Comparison Group | 2.48                  | 1.72                  |   |
|                   | Risk Difference             | -0.7 (-1.25 to -0.13) | -0.67 (-1 to -0.33)   |   |
|                   | p-value                     | 1                     | 1                     | 1 |
| <b>Hematology</b> |                             |                       |                       |   |
| Thrombocytopenia  | SARS-CoV-2 Group            | 0.8                   | 1.01                  |   |
|                   | Viral LRTI Comparison Group | 1.02                  | 1.07                  |   |
|                   | Risk Difference             | -0.22 (-0.54 to 0.12) | -0.06 (-0.35 to 0.22) |   |
|                   | p-value                     | 1                     | 1                     | 1 |
| Leukopenia        | SARS-CoV-2 Group            | 0.23                  | 0.3                   |   |
|                   | Viral LRTI Comparison Group | 0.28                  | 0.2                   |   |
|                   | Risk Difference             | -0.05 (-0.21 to 0.12) | 0.1 (-0.05 to 0.25)   |   |
|                   | p-value                     | 1                     | 1                     | 1 |
| Anemia            | SARS-CoV-2 Group            | 2.54                  | 3.91                  |   |
|                   | Viral LRTI Comparison Group | 2.78                  | 4.07                  |   |
|                   | Risk Difference             | -0.24 (-0.78 to 0.34) | -0.16 (-0.76 to 0.52) |   |
|                   | p-value                     | 1                     | 1                     | 1 |
| <b>Symptom</b>    |                             |                       |                       |   |
| Myalgia           | SARS-CoV-2 Group            | 7.15                  | 9.07                  |   |
|                   | Viral LRTI Comparison Group | 8.22                  | 9.46                  |   |
|                   | Risk Difference             | -1.07 (-2.12 to 0)    | -0.39 (-1.47 to 0.66) |   |
|                   | p-value                     | 1                     | 1                     | 1 |
| Fatigue Diagnosis | SARS-CoV-2 Group            | 8.46                  | 13.44                 |   |
|                   | Viral LRTI Comparison Group | 7.67                  | 13.72                 |   |



|                      |                             |                       |                       |      |
|----------------------|-----------------------------|-----------------------|-----------------------|------|
|                      | Risk Difference             | 0.79 (-0.18 to 1.85)  | -0.28 (-1.98 to 1.1)  |      |
|                      | p-value                     | 0.74                  | 1                     | 0.15 |
| > Fatigue            | SARS-CoV-2 Group            | 8.3                   | 13.25                 |      |
|                      | Viral LRTI Comparison Group | 7.65                  | 13.72                 |      |
|                      | Risk Difference             | 0.65 (-0.67 to 1.73)  | -0.48 (-1.86 to 1.12) |      |
|                      | p-value                     | 1                     | 1                     | 0.13 |
| > Chronic Fatigue    | SARS-CoV-2 Group            | 0.41                  | 0.37                  |      |
|                      | Viral LRTI Comparison Group | 0.42                  | 0.44                  |      |
|                      | Risk Difference             | -0.01 (-0.28 to 0.22) | -0.07 (-0.26 to 0.13) |      |
|                      | p-value                     | 1                     | 1                     | 1    |
| > Post-viral Fatigue | SARS-CoV-2 Group            | 0.22                  | 0.26                  |      |
|                      | Viral LRTI Comparison Group | 0.02                  | 0.08                  |      |
|                      | Risk Difference             | 0.21 (0.12 to 0.33)   | 0.18 (0.07 to 0.29)   |      |
|                      | p-value                     | <0.001                | <0.001                | 1    |
| Anosmia              | SARS-CoV-2 Group            | 0.08                  | 0.04                  |      |
|                      | Viral LRTI Comparison Group | 0.02                  | 0.02                  |      |
|                      | Risk Difference             | 0.06 (-0.02 to 0.13)  | 0.02 (-0.03 to 0.08)  |      |
|                      | p-value                     | 0.21                  | 1                     | 1    |

Subgroups are subpopulations of the SARS-CoV-2 and viral LRTI cohorts.

Cumulative incidence was obtained by Kaplan-Meier estimator at 120 days after the start of the post-acute phase (141 days after index date).

Confidence intervals were calculated based on Bonferroni correction, i.e.,  $(1 - 0.05/(N \times \text{number of subgroup levels}))$  confidence interval.

Individuals were excluded if they had less than 21 days of observation from the index date, had already been diagnosed with the outcome of interest prior to acute phase, or their matched pair was excluded for the same reasons.

Table 5j: Cumulative Incidence and Risk Difference per 100 Individuals of the SARS-CoV-2 and Viral LRTI Comparison Group for Clinical Sequelae in the Post-Acute Phase by Race

| Clinical Sequelae               | Category                    | White                  | Black                   | p-interaction |
|---------------------------------|-----------------------------|------------------------|-------------------------|---------------|
|                                 | Matched Group Size          | 56,338 vs 56,338       | 6,475 vs 6,475          |               |
| <b>Hypertension</b>             |                             |                        |                         |               |
| Hypertension                    | SARS-CoV-2 Group            | 12.1                   | 19.67                   |               |
|                                 | Viral LRTI Comparison Group | 12.5                   | 19.83                   |               |
|                                 | Risk Difference             | -0.4 (-4.25 to 3.18)   | -0.17 (-22.97 to 23.26) |               |
|                                 | p-value                     | 1                      | 1                       | 1             |
| <b>Pulmonary Hypertension</b>   |                             |                        |                         |               |
| Pulmonary Hypertension          | SARS-CoV-2 Group            | 0.96                   | 1.17                    |               |
|                                 | Viral LRTI Comparison Group | 1.54                   | 1.99                    |               |
|                                 | Risk Difference             | -0.57 (-0.83 to -0.24) | -0.82 (-1.67 to 0)      |               |
|                                 | p-value                     | 1                      | 1                       | 0.28          |
| <b>Cardiology</b>               |                             |                        |                         |               |
| <b>Cardiac Rhythm Disorders</b> |                             |                        |                         |               |
| Cardiac Rhythm Disorders        | SARS-CoV-2 Group            | 4.95                   | 6.07                    |               |
|                                 | Viral LRTI Comparison Group | 5.13                   | 6.16                    |               |
|                                 | Risk Difference             | -0.18 (-0.86 to 0.39)  | -0.09 (-1.84 to 1.79)   |               |
|                                 | p-value                     | 1                      | 1                       | 1             |
| <b>&gt; Cardiac Arrhythmia</b>  |                             |                        |                         |               |
| > Cardiac Arrhythmia            | SARS-CoV-2 Group            | 2.85                   | 3.78                    |               |
|                                 | Viral LRTI Comparison Group | 3.36                   | 3.37                    |               |
|                                 | Risk Difference             | -0.51 (-0.91 to -0.08) | 0.41 (-0.92 to 1.62)    |               |
|                                 | p-value                     | 1                      | 1                       | 1             |
| <b>&gt; Tachycardia</b>         |                             |                        |                         |               |
| > Tachycardia                   | SARS-CoV-2 Group            | 2.99                   | 3.76                    |               |
|                                 | Viral LRTI Comparison Group | 2.71                   | 4.03                    |               |
|                                 | Risk Difference             | 0.28 (-0.17 to 0.71)   | -0.27 (-1.53 to 1.16)   |               |
|                                 | p-value                     | 1                      | 1                       | 1             |
| <b>&gt; POTs</b>                |                             |                        |                         |               |
| > POTs                          | SARS-CoV-2 Group            | 1.12                   | 1.71                    |               |

|                                |                             |                        |                        |      |
|--------------------------------|-----------------------------|------------------------|------------------------|------|
|                                | Viral LRTI Comparison Group | 1.4                    | 1.62                   |      |
|                                | Risk Difference             | -0.27 (-0.63 to -0.02) | 0.09 (-0.82 to 0.92)   |      |
|                                | p-value                     | 1                      | 1                      | 1    |
| CHF Cardiomyopathy Myocarditis | SARS-CoV-2 Group            | 3.15                   | 3.79                   |      |
|                                | Viral LRTI Comparison Group | 6.04                   | 6.48                   |      |
|                                | Risk Difference             | -2.89 (-3.57 to -2.29) | -2.69 (-4.37 to -1.08) |      |
|                                | p-value                     | 1                      | 1                      | 1    |
| > Congestive Heart Failure     | SARS-CoV-2 Group            | 2.76                   | 3.47                   |      |
|                                | Viral LRTI Comparison Group | 5.44                   | 6.01                   |      |
|                                | Risk Difference             | -2.67 (-3.17 to -2.08) | -2.54 (-4.1 to -0.93)  |      |
|                                | p-value                     | 1                      | 1                      | 1    |
| > Cardiomyopathy               | SARS-CoV-2 Group            | 1.13                   | 1.28                   |      |
|                                | Viral LRTI Comparison Group | 1.74                   | 2.33                   |      |
|                                | Risk Difference             | -0.6 (-0.95 to -0.29)  | -1.05 (-1.9 to -0.12)  |      |
|                                | p-value                     | 1                      | 1                      | 0.34 |
| > Myocarditis                  | SARS-CoV-2 Group            | 0.04                   | 0.08                   |      |
|                                | Viral LRTI Comparison Group | 0.01                   | 0.02                   |      |
|                                | Risk Difference             | 0.03 (-0.01 to 0.08)   | 0.06 (-0.07 to 0.22)   |      |
|                                | p-value                     | 0.74                   | 1                      | 1    |
| Coronary Disease               | SARS-CoV-2 Group            | 1.7                    | 1.84                   |      |
|                                | Viral LRTI Comparison Group | 2.14                   | 2.57                   |      |
|                                | Risk Difference             | -0.44 (-0.81 to -0.12) | -0.73 (-1.91 to 0.42)  |      |
|                                | p-value                     | 1                      | 1                      | 1    |
| > Myocardial Infarction        | SARS-CoV-2 Group            | 1.41                   | 1.47                   |      |
|                                | Viral LRTI Comparison Group | 1.77                   | 2.19                   |      |
|                                | Risk Difference             | -0.37 (-0.67 to -0.05) | -0.72 (-1.85 to 0.24)  |      |

|                               |                             |                       |                       |   |
|-------------------------------|-----------------------------|-----------------------|-----------------------|---|
|                               | p-value                     | 1                     | 1                     | 1 |
| > Acute Coronary Syndrome     | SARS-CoV-2 Group            | 1.69                  | 1.84                  |   |
|                               | Viral LRTI Comparison Group | 2.14                  | 2.53                  |   |
|                               | Risk Difference             | -0.45 (-0.8 to -0.07) | -0.69 (-1.74 to 0.24) |   |
|                               | p-value                     | 1                     | 1                     | 1 |
| Cardiogenic Shock             | SARS-CoV-2 Group            | 0.14                  | 0.27                  |   |
|                               | Viral LRTI Comparison Group | 0.2                   | 0.56                  |   |
|                               | Risk Difference             | -0.06 (-0.19 to 0.04) | -0.29 (-0.74 to 0.14) |   |
|                               | p-value                     | 1                     | 1                     | 1 |
| Hypercoagulability DVT PE PAO | SARS-CoV-2 Group            | 3.35                  | 4.66                  |   |
|                               | Viral LRTI Comparison Group | 3.2                   | 4.71                  |   |
|                               | Risk Difference             | 0.15 (-0.36 to 0.54)  | -0.05 (-1.91 to 1.21) |   |
|                               | p-value                     | 1                     | 1                     | 1 |
| > Hypercoagulability          | SARS-CoV-2 Group            | 2.28                  | 3.36                  |   |
|                               | Viral LRTI Comparison Group | 2.26                  | 3.39                  |   |
|                               | Risk Difference             | 0.02 (-0.42 to 0.35)  | -0.03 (-1.21 to 1.12) |   |
|                               | p-value                     | 1                     | 1                     | 1 |
| > Deep Vein Thrombosis        | SARS-CoV-2 Group            | 1.61                  | 2.6                   |   |
|                               | Viral LRTI Comparison Group | 1.47                  | 2.48                  |   |
|                               | Risk Difference             | 0.14 (-0.18 to 0.45)  | 0.12 (-0.87 to 1.1)   |   |
|                               | p-value                     | 1                     | 1                     | 1 |
| > Pulmonary Embolism          | SARS-CoV-2 Group            | 1.22                  | 1.51                  |   |
|                               | Viral LRTI Comparison Group | 1.11                  | 1.7                   |   |
|                               | Risk Difference             | 0.1 (-0.15 to 0.36)   | -0.19 (-1.09 to 0.59) |   |
|                               | p-value                     | 1                     | 1                     | 1 |

|                                   |                             |                       |                       |   |
|-----------------------------------|-----------------------------|-----------------------|-----------------------|---|
| > Peripheral Arterial Occlusions  | SARS-CoV-2 Group            | 0.41                  | 0.69                  |   |
|                                   | Viral LRTI Comparison Group | 0.45                  | 0.89                  |   |
|                                   | Risk Difference             | -0.04 (-0.21 to 0.11) | -0.2 (-0.79 to 0.43)  |   |
|                                   | p-value                     | 1                     | 1                     | 1 |
| Stroke and Sequelae               | SARS-CoV-2 Group            | 2.31                  | 2.66                  |   |
|                                   | Viral LRTI Comparison Group | 2.62                  | 3.51                  |   |
|                                   | Risk Difference             | -0.31 (-0.77 to 0.11) | -0.85 (-2.24 to 0.34) |   |
|                                   | p-value                     | 1                     | 1                     | 1 |
| > Ischemic Stroke and Sequelae    | SARS-CoV-2 Group            | 2.07                  | 2.64                  |   |
|                                   | Viral LRTI Comparison Group | 2.35                  | 3.28                  |   |
|                                   | Risk Difference             | -0.28 (-0.71 to 0.1)  | -0.64 (-1.82 to 0.49) |   |
|                                   | p-value                     | 1                     | 1                     | 1 |
| > Hemorrhagic Stroke and Sequelae | SARS-CoV-2 Group            | 1.3                   | 1.77                  |   |
|                                   | Viral LRTI Comparison Group | 1.54                  | 2.15                  |   |
|                                   | Risk Difference             | -0.23 (-0.55 to 0.07) | -0.38 (-1.34 to 0.48) |   |
|                                   | p-value                     | 1                     | 1                     | 1 |
| <b>Mental Health</b>              |                             |                       |                       |   |
| Mental Health Diagnosis           | SARS-CoV-2 Group            | 6.34                  | 3.87                  |   |
|                                   | Viral LRTI Comparison Group | 6.35                  | 4.51                  |   |
|                                   | Risk Difference             | 0 (-0.8 to 0.78)      | -0.64 (-2.3 to 0.71)  |   |
|                                   | p-value                     | 1                     | 1                     | 1 |
| Psychosis                         | SARS-CoV-2 Group            | 0.37                  | 0.31                  |   |
|                                   | Viral LRTI Comparison Group | 0.34                  | 0.31                  |   |
|                                   | Risk Difference             | 0.03 (-0.11 to 0.18)  | 0 (-0.38 to 0.4)      |   |
|                                   | p-value                     | 1                     | 1                     | 1 |

|                           |                             |                       |                       |   |
|---------------------------|-----------------------------|-----------------------|-----------------------|---|
| <b>Neurologic</b>         |                             |                       |                       |   |
| Amnesia/Memory Difficulty | SARS-CoV-2 Group            | 5.78                  | 6.52                  |   |
|                           | Viral LRTI Comparison Group | 5.64                  | 6.46                  |   |
|                           | Risk Difference             | 0.14 (-0.45 to 0.77)  | 0.06 (-1.76 to 2.03)  |   |
|                           | p-value                     | 1                     | 1                     | 1 |
| Migraine                  | SARS-CoV-2 Group            | 0.32                  | 0.18                  |   |
|                           | Viral LRTI Comparison Group | 0.4                   | 0.23                  |   |
|                           | Risk Difference             | -0.08 (-0.28 to 0.07) | -0.05 (-0.41 to 0.26) |   |
|                           | p-value                     | 1                     | 1                     | 1 |
| Peripheral Neuropathy     | SARS-CoV-2 Group            | 0.99                  | 0.71                  |   |
|                           | Viral LRTI Comparison Group | 1.15                  | 1.08                  |   |
|                           | Risk Difference             | -0.16 (-0.44 to 0.1)  | -0.37 (-1.38 to 0.27) |   |
|                           | p-value                     | 1                     | 1                     | 1 |
| Encephalopathy            | SARS-CoV-2 Group            | 2.7                   | 4.27                  |   |
|                           | Viral LRTI Comparison Group | 2.68                  | 3.81                  |   |
|                           | Risk Difference             | 0.03 (-0.46 to 0.43)  | 0.45 (-0.99 to 1.96)  |   |
|                           | p-value                     | 1                     | 1                     | 1 |
| Seizure                   | SARS-CoV-2 Group            | 0.52                  | 0.59                  |   |
|                           | Viral LRTI Comparison Group | 0.6                   | 1.11                  |   |
|                           | Risk Difference             | -0.08 (-0.26 to 0.12) | -0.52 (-1.18 to 0.11) |   |
|                           | p-value                     | 1                     | 1                     | 1 |
| Dementia                  | SARS-CoV-2 Group            | 3.09                  | 3.6                   |   |
|                           | Viral LRTI Comparison Group | 2.38                  | 3.08                  |   |
|                           | Risk Difference             | 0.71 (0.25 to 1.13)   | 0.51 (-0.91 to 1.83)  |   |
|                           | p-value                     | <0.001                | 1                     | 1 |
| Guillain-Barre Syndrome   | SARS-CoV-2 Group            | 0.02                  | 0                     |   |

|                          |                             |                        |                       |      |
|--------------------------|-----------------------------|------------------------|-----------------------|------|
|                          | Viral LRTI Comparison Group | 0.01                   | 0                     |      |
|                          | Risk Difference             | 0.01 (-0.01 to 0.05)   | 0 (0 to 0)            |      |
|                          | p-value                     | 1                      | <0.001                | 1    |
| <b>Diabetes</b>          |                             |                        |                       |      |
| Type 2 Diabetes          | SARS-CoV-2 Group            | 2.58                   | 5.01                  |      |
|                          | Viral LRTI Comparison Group | 2.32                   | 4.8                   |      |
|                          | Risk Difference             | 0.25 (-0.29 to 0.78)   | 0.21 (-2.2 to 3.17)   |      |
|                          | p-value                     | 1                      | 1                     | 1    |
| <b>Liver</b>             |                             |                        |                       |      |
| Liver Test Abnormality   | SARS-CoV-2 Group            | 1.69                   | 1.76                  |      |
|                          | Viral LRTI Comparison Group | 1.81                   | 2.1                   |      |
|                          | Risk Difference             | -0.12 (-0.5 to 0.17)   | -0.34 (-1.3 to 0.53)  |      |
|                          | p-value                     | 1                      | 1                     | 1    |
| <b>Nephrology</b>        |                             |                        |                       |      |
| Kidney Injury            | SARS-CoV-2 Group            | 6.63                   | 9.91                  |      |
|                          | Viral LRTI Comparison Group | 7.03                   | 9.72                  |      |
|                          | Risk Difference             | -0.4 (-1.16 to 0.39)   | 0.19 (-2.5 to 2.39)   |      |
|                          | p-value                     | 1                      | 1                     | 1    |
| > Chronic Kidney Disease | SARS-CoV-2 Group            | 4.44                   | 5.79                  |      |
|                          | Viral LRTI Comparison Group | 5.17                   | 6.81                  |      |
|                          | Risk Difference             | -0.73 (-1.34 to -0.05) | -1.01 (-3.15 to 1.09) |      |
|                          | p-value                     | 1                      | 1                     | 1    |
| > Acute Kidney Injury    | SARS-CoV-2 Group            | 4.34                   | 7.98                  |      |
|                          | Viral LRTI Comparison Group | 4.84                   | 7.25                  |      |
|                          | Risk Difference             | -0.5 (-1.06 to 0.01)   | 0.73 (-1.44 to 2.5)   |      |
|                          | p-value                     | 1                      | 1                     | 0.76 |
| <b>Respiratory</b>       |                             |                        |                       |      |
| Respiratory Failure      | SARS-CoV-2 Group            | 8.82                   | 10.95                 |      |

|                                  |                             |                        |                       |       |
|----------------------------------|-----------------------------|------------------------|-----------------------|-------|
|                                  | Viral LRTI Comparison Group | 6.93                   | 6.44                  |       |
|                                  | Risk Difference             | 1.89 (1.17 to 2.52)    | 4.51 (2.67 to 6.26)   |       |
|                                  | p-value                     | <0.001                 | <0.001                | 0.01  |
| > Acute Respiratory Failure      | SARS-CoV-2 Group            | 7.74                   | 10.52                 |       |
|                                  | Viral LRTI Comparison Group | 4.95                   | 5.46                  |       |
|                                  | Risk Difference             | 2.79 (2.16 to 3.43)    | 5.06 (3.59 to 6.5)    |       |
|                                  | p-value                     | <0.001                 | <0.001                | 0.007 |
| > Chronic Respiratory Failure    | SARS-CoV-2 Group            | 1.41                   | 1.64                  |       |
|                                  | Viral LRTI Comparison Group | 1.91                   | 1.48                  |       |
|                                  | Risk Difference             | -0.5 (-0.83 to -0.18)  | 0.16 (-0.88 to 0.94)  |       |
|                                  | p-value                     | 1                      | 1                     | 1     |
| > Interstitial Lung Disease      | SARS-CoV-2 Group            | 1.34                   | 1.1                   |       |
|                                  | Viral LRTI Comparison Group | 1.9                    | 1.24                  |       |
|                                  | Risk Difference             | -0.56 (-0.85 to -0.25) | -0.14 (-0.85 to 0.76) |       |
|                                  | p-value                     | 1                      | 1                     | 1     |
| <b>Dermatologic</b>              |                             |                        |                       |       |
| Atopic Dermatitis                | SARS-CoV-2 Group            | 0.25                   | 0.17                  |       |
|                                  | Viral LRTI Comparison Group | 0.27                   | 0.19                  |       |
|                                  | Risk Difference             | -0.02 (-0.16 to 0.1)   | -0.02 (-0.34 to 0.28) |       |
|                                  | p-value                     | 1                      | 1                     | 1     |
| Urticaria                        | SARS-CoV-2 Group            | 0.19                   | 0.15                  |       |
|                                  | Viral LRTI Comparison Group | 0.23                   | 0.11                  |       |
|                                  | Risk Difference             | -0.04 (-0.14 to 0.1)   | 0.05 (-0.2 to 0.33)   |       |
|                                  | p-value                     | 1                      | 1                     | 1     |
| Herpesviral Vesicular Dermatitis | SARS-CoV-2 Group            | 0.1                    | 0                     |       |



|                   |                             |                        |                        |      |
|-------------------|-----------------------------|------------------------|------------------------|------|
|                   | Viral LRTI Comparison Group | 0.07                   | 0                      |      |
|                   | Risk Difference             | 0.03 (-0.05 to 0.12)   | 0 (0 to 0)             |      |
|                   | p-value                     | 1                      | <0.001                 | 1    |
| <b>Others</b>     |                             |                        |                        |      |
| Sleep Apnea       | SARS-CoV-2 Group            | 1.55                   | 1.13                   |      |
|                   | Viral LRTI Comparison Group | 2.15                   | 2.24                   |      |
|                   | Risk Difference             | -0.6 (-1.01 to -0.19)  | -1.12 (-2.04 to -0.18) |      |
|                   | p-value                     | 1                      | 1                      | 0.03 |
| <b>Hematology</b> |                             |                        |                        |      |
| Thrombocytopenia  | SARS-CoV-2 Group            | 0.91                   | 0.9                    |      |
|                   | Viral LRTI Comparison Group | 0.99                   | 1.39                   |      |
|                   | Risk Difference             | -0.09 (-0.32 to 0.18)  | -0.49 (-1.2 to 0.3)    |      |
|                   | p-value                     | 1                      | 1                      | 1    |
| Leukopenia        | SARS-CoV-2 Group            | 0.3                    | 0.29                   |      |
|                   | Viral LRTI Comparison Group | 0.26                   | 0.3                    |      |
|                   | Risk Difference             | 0.04 (-0.11 to 0.17)   | 0 (-0.37 to 0.36)      |      |
|                   | p-value                     | 1                      | 1                      | 1    |
| Anemia            | SARS-CoV-2 Group            | 3.25                   | 4.2                    |      |
|                   | Viral LRTI Comparison Group | 3.62                   | 5.01                   |      |
|                   | Risk Difference             | -0.37 (-0.94 to 0.13)  | -0.8 (-2.19 to 0.78)   |      |
|                   | p-value                     | 1                      | 1                      | 1    |
| <b>Symptom</b>    |                             |                        |                        |      |
| Myalgia           | SARS-CoV-2 Group            | 8.05                   | 8.03                   |      |
|                   | Viral LRTI Comparison Group | 9.23                   | 10.2                   |      |
|                   | Risk Difference             | -1.19 (-2.18 to -0.25) | -2.16 (-4.86 to 0.78)  |      |
|                   | p-value                     | 1                      | 1                      | 0.04 |
| Fatigue Diagnosis | SARS-CoV-2 Group            | 11.16                  | 11.49                  |      |
|                   | Viral LRTI Comparison Group | 11.19                  | 11.22                  |      |

|                      |                             |                       |                       |   |
|----------------------|-----------------------------|-----------------------|-----------------------|---|
|                      | Risk Difference             | -0.03 (-1.2 to 0.97)  | 0.27 (-2.06 to 2.91)  |   |
|                      | p-value                     | 1                     | 1                     | 1 |
| > Fatigue            | SARS-CoV-2 Group            | 11.01                 | 11.25                 |   |
|                      | Viral LRTI Comparison Group | 11.17                 | 11.18                 |   |
|                      | Risk Difference             | -0.16 (-1.32 to 0.75) | 0.06 (-2.73 to 2.71)  |   |
|                      | p-value                     | 1                     | 1                     | 1 |
| > Chronic Fatigue    | SARS-CoV-2 Group            | 0.39                  | 0.37                  |   |
|                      | Viral LRTI Comparison Group | 0.42                  | 0.38                  |   |
|                      | Risk Difference             | -0.03 (-0.24 to 0.15) | -0.01 (-0.47 to 0.39) |   |
|                      | p-value                     | 1                     | 1                     | 1 |
| > Post-viral Fatigue | SARS-CoV-2 Group            | 0.25                  | 0.29                  |   |
|                      | Viral LRTI Comparison Group | 0.03                  | 0.12                  |   |
|                      | Risk Difference             | 0.22 (0.13 to 0.31)   | 0.17 (-0.1 to 0.53)   |   |
|                      | p-value                     | <0.001                | 1                     | 1 |
| Anosmia              | SARS-CoV-2 Group            | 0.07                  | 0.07                  |   |
|                      | Viral LRTI Comparison Group | 0.01                  | 0.11                  |   |
|                      | Risk Difference             | 0.06 (0.01 to 0.11)   | -0.04 (-0.27 to 0.16) |   |
|                      | p-value                     | <0.001                | 1                     | 1 |

Subgroups are subpopulations of the SARS-CoV-2 and viral LRTI cohorts.

Cumulative incidence was obtained by Kaplan-Meier estimator at 120 days after the start of the post-acute phase (141 days after index date).

Confidence intervals were calculated based on Bonferroni correction, i.e.,  $(1 - 0.05/(N \times \text{number of subgroup levels}))$  confidence interval.

Individuals were excluded if they had less than 21 days of observation from the index date, had already been diagnosed with the outcome of interest prior to acute phase, or their matched pair was excluded for the same reasons.

Table 5k: Cumulative Incidence and Risk Difference per 100 Individuals of the SARS-CoV-2 and Viral LRTI Comparison Group for Clinical Sequelae in the Post-Acute Phase by Gender

| Clinical Sequelae             | Category                    | Female                 | Male                   | p-interaction |
|-------------------------------|-----------------------------|------------------------|------------------------|---------------|
|                               | Matched Group Size          | 41,363 vs 41,363       | 31,941 vs 31,941       |               |
| <b>Hypertension</b>           |                             |                        |                        |               |
| Hypertension                  | SARS-CoV-2 Group            | 10.71                  | 16.76                  |               |
|                               | Viral LRTI Comparison Group | 13.71                  | 16.89                  |               |
|                               | Risk Difference             | -3 (-8.73 to 1.75)     | -0.13 (-5.69 to 5.12)  |               |
|                               | p-value                     | 1                      | 1                      | 1             |
| <b>Pulmonary Hypertension</b> |                             |                        |                        |               |
| Pulmonary Hypertension        | SARS-CoV-2 Group            | 0.96                   | 1.01                   |               |
|                               | Viral LRTI Comparison Group | 1.5                    | 1.4                    |               |
|                               | Risk Difference             | -0.54 (-0.82 to -0.22) | -0.39 (-0.72 to -0.02) |               |
|                               | p-value                     | 1                      | 1                      | 1             |
| <b>Cardiology</b>             |                             |                        |                        |               |
| Cardiac Rhythm Disorders      | SARS-CoV-2 Group            | 4.11                   | 5.64                   |               |
|                               | Viral LRTI Comparison Group | 4.76                   | 6.07                   |               |
|                               | Risk Difference             | -0.64 (-1.23 to 0.17)  | -0.42 (-1.48 to 0.44)  |               |
|                               | p-value                     | 1                      | 1                      | 1             |
| > Cardiac Arrhythmia          | SARS-CoV-2 Group            | 2.38                   | 3.33                   |               |
|                               | Viral LRTI Comparison Group | 2.79                   | 3.79                   |               |
|                               | Risk Difference             | -0.41 (-0.88 to 0.08)  | -0.46 (-1.23 to 0.15)  |               |
|                               | p-value                     | 1                      | 1                      | 1             |
| > Tachycardia                 | SARS-CoV-2 Group            | 2.42                   | 3.44                   |               |
|                               | Viral LRTI Comparison Group | 2.74                   | 3.23                   |               |
|                               | Risk Difference             | -0.32 (-0.82 to 0.18)  | 0.21 (-0.41 to 0.87)   |               |
|                               | p-value                     | 1                      | 1                      | 1             |
| > POTs                        | SARS-CoV-2 Group            | 1                      | 1.31                   |               |

|                                |                             |                        |                        |     |
|--------------------------------|-----------------------------|------------------------|------------------------|-----|
|                                | Viral LRTI Comparison Group | 1.13                   | 1.42                   |     |
|                                | Risk Difference             | -0.13 (-0.43 to 0.2)   | -0.11 (-0.45 to 0.25)  |     |
|                                | p-value                     | 1                      | 1                      | 1   |
| CHF Cardiomyopathy Myocarditis | SARS-CoV-2 Group            | 2.81                   | 3.59                   |     |
|                                | Viral LRTI Comparison Group | 5.29                   | 6.27                   |     |
|                                | Risk Difference             | -2.48 (-3.05 to -1.91) | -2.69 (-3.37 to -1.97) |     |
|                                | p-value                     | 1                      | 1                      | 1   |
| > Congestive Heart Failure     | SARS-CoV-2 Group            | 2.57                   | 3.22                   |     |
|                                | Viral LRTI Comparison Group | 4.82                   | 5.66                   |     |
|                                | Risk Difference             | -2.24 (-2.83 to -1.6)  | -2.44 (-3.23 to -1.63) |     |
|                                | p-value                     | 1                      | 1                      | 1   |
| > Cardiomyopathy               | SARS-CoV-2 Group            | 0.81                   | 1.49                   |     |
|                                | Viral LRTI Comparison Group | 1.31                   | 2.35                   |     |
|                                | Risk Difference             | -0.51 (-0.77 to -0.16) | -0.86 (-1.29 to -0.38) |     |
|                                | p-value                     | 1                      | 1                      | 0.1 |
| > Myocarditis                  | SARS-CoV-2 Group            | 0.03                   | 0.02                   |     |
|                                | Viral LRTI Comparison Group | 0.03                   | 0.02                   |     |
|                                | Risk Difference             | 0 (-0.04 to 0.06)      | 0 (-0.04 to 0.04)      |     |
|                                | p-value                     | 1                      | 1                      | 1   |
| Coronary Disease               | SARS-CoV-2 Group            | 1.43                   | 1.93                   |     |
|                                | Viral LRTI Comparison Group | 1.78                   | 2.55                   |     |
|                                | Risk Difference             | -0.35 (-0.73 to 0.06)  | -0.62 (-1.11 to -0.21) |     |
|                                | p-value                     | 1                      | 1                      | 1   |
| > Myocardial Infarction        | SARS-CoV-2 Group            | 1.21                   | 1.53                   |     |
|                                | Viral LRTI Comparison Group | 1.47                   | 2.09                   |     |
|                                | Risk Difference             | -0.26 (-0.65 to 0)     | -0.56 (-1.01 to -0.1)  |     |

|                               |                             |                        |                        |   |
|-------------------------------|-----------------------------|------------------------|------------------------|---|
|                               | p-value                     | 1                      | 1                      | 1 |
| > Acute Coronary Syndrome     | SARS-CoV-2 Group            | 1.42                   | 1.92                   |   |
|                               | Viral LRTI Comparison Group | 1.78                   | 2.54                   |   |
|                               | Risk Difference             | -0.36 (-0.71 to -0.03) | -0.61 (-1.14 to -0.16) |   |
|                               | p-value                     | 1                      | 1                      | 1 |
| Cardiogenic Shock             | SARS-CoV-2 Group            | 0.1                    | 0.19                   |   |
|                               | Viral LRTI Comparison Group | 0.15                   | 0.34                   |   |
|                               | Risk Difference             | -0.05 (-0.15 to 0.05)  | -0.15 (-0.31 to 0.04)  |   |
|                               | p-value                     | 1                      | 1                      | 1 |
| Hypercoagulability DVT PE PAO | SARS-CoV-2 Group            | 2.99                   | 3.83                   |   |
|                               | Viral LRTI Comparison Group | 3.04                   | 3.83                   |   |
|                               | Risk Difference             | -0.05 (-0.55 to 0.48)  | 0 (-0.61 to 0.64)      |   |
|                               | p-value                     | 1                      | 1                      | 1 |
| > Hypercoagulability          | SARS-CoV-2 Group            | 2.18                   | 2.54                   |   |
|                               | Viral LRTI Comparison Group | 2.11                   | 2.69                   |   |
|                               | Risk Difference             | 0.06 (-0.3 to 0.48)    | -0.16 (-0.72 to 0.35)  |   |
|                               | p-value                     | 1                      | 1                      | 1 |
| > Deep Vein Thrombosis        | SARS-CoV-2 Group            | 1.6                    | 1.75                   |   |
|                               | Viral LRTI Comparison Group | 1.46                   | 1.8                    |   |
|                               | Risk Difference             | 0.14 (-0.23 to 0.5)    | -0.05 (-0.47 to 0.39)  |   |
|                               | p-value                     | 1                      | 1                      | 1 |
| > Pulmonary Embolism          | SARS-CoV-2 Group            | 1.04                   | 1.35                   |   |
|                               | Viral LRTI Comparison Group | 1.05                   | 1.21                   |   |
|                               | Risk Difference             | -0.02 (-0.25 to 0.24)  | 0.15 (-0.15 to 0.57)   |   |
|                               | p-value                     | 1                      | 1                      | 1 |

|                                   |                             |                       |                        |     |
|-----------------------------------|-----------------------------|-----------------------|------------------------|-----|
| > Peripheral Arterial Occlusions  | SARS-CoV-2 Group            | 0.31                  | 0.6                    |     |
|                                   | Viral LRTI Comparison Group | 0.41                  | 0.66                   |     |
|                                   | Risk Difference             | -0.1 (-0.28 to 0.09)  | -0.06 (-0.33 to 0.19)  |     |
|                                   | p-value                     | 1                     | 1                      | 1   |
| Stroke and Sequelae               | SARS-CoV-2 Group            | 2.21                  | 2.39                   |     |
|                                   | Viral LRTI Comparison Group | 2.46                  | 3.07                   |     |
|                                   | Risk Difference             | -0.25 (-0.67 to 0.27) | -0.68 (-1.38 to -0.08) |     |
|                                   | p-value                     | 1                     | 1                      | 1   |
| > Ischemic Stroke and Sequelae    | SARS-CoV-2 Group            | 1.95                  | 2.12                   |     |
|                                   | Viral LRTI Comparison Group | 2.19                  | 2.68                   |     |
|                                   | Risk Difference             | -0.24 (-0.61 to 0.14) | -0.56 (-1.12 to -0.02) |     |
|                                   | p-value                     | 1                     | 1                      | 1   |
| > Hemorrhagic Stroke and Sequelae | SARS-CoV-2 Group            | 1.34                  | 1.46                   |     |
|                                   | Viral LRTI Comparison Group | 1.41                  | 2.1                    |     |
|                                   | Risk Difference             | -0.06 (-0.37 to 0.28) | -0.64 (-1.07 to -0.15) |     |
|                                   | p-value                     | 1                     | 1                      | 0.2 |
| <b>Mental Health</b>              |                             |                       |                        |     |
| Mental Health Diagnosis           | SARS-CoV-2 Group            | 7.02                  | 4.32                   |     |
|                                   | Viral LRTI Comparison Group | 6.47                  | 4.3                    |     |
|                                   | Risk Difference             | 0.54 (-0.38 to 1.47)  | 0.02 (-0.79 to 0.81)   |     |
|                                   | p-value                     | 1                     | 1                      | 1   |
| Psychosis                         | SARS-CoV-2 Group            | 0.37                  | 0.35                   |     |
|                                   | Viral LRTI Comparison Group | 0.33                  | 0.34                   |     |
|                                   | Risk Difference             | 0.04 (-0.13 to 0.2)   | 0.01 (-0.15 to 0.23)   |     |
|                                   | p-value                     | 1                     | 1                      | 1   |

|                           |                             |                       |                       |     |
|---------------------------|-----------------------------|-----------------------|-----------------------|-----|
| <b>Neurologic</b>         |                             |                       |                       |     |
| Amnesia/Memory Difficulty | SARS-CoV-2 Group            | 5.73                  | 5.3                   |     |
|                           | Viral LRTI Comparison Group | 5.46                  | 5.66                  |     |
|                           | Risk Difference             | 0.27 (-0.56 to 1.04)  | -0.36 (-1.26 to 0.6)  |     |
|                           | p-value                     | 1                     | 1                     | 1   |
| Migraine                  | SARS-CoV-2 Group            | 0.36                  | 0.19                  |     |
|                           | Viral LRTI Comparison Group | 0.45                  | 0.21                  |     |
|                           | Risk Difference             | -0.08 (-0.27 to 0.09) | -0.02 (-0.19 to 0.15) |     |
|                           | p-value                     | 1                     | 1                     | 1   |
| Peripheral Neuropathy     | SARS-CoV-2 Group            | 0.93                  | 1.01                  |     |
|                           | Viral LRTI Comparison Group | 1.08                  | 1.12                  |     |
|                           | Risk Difference             | -0.15 (-0.41 to 0.15) | -0.1 (-0.43 to 0.24)  |     |
|                           | p-value                     | 1                     | 1                     | 1   |
| Encephalopathy            | SARS-CoV-2 Group            | 2.64                  | 2.9                   |     |
|                           | Viral LRTI Comparison Group | 2.41                  | 2.99                  |     |
|                           | Risk Difference             | 0.23 (-0.25 to 0.7)   | -0.09 (-0.72 to 0.38) |     |
|                           | p-value                     | 1                     | 1                     | 1   |
| Seizure                   | SARS-CoV-2 Group            | 0.54                  | 0.55                  |     |
|                           | Viral LRTI Comparison Group | 0.58                  | 0.59                  |     |
|                           | Risk Difference             | -0.04 (-0.24 to 0.15) | -0.04 (-0.3 to 0.2)   |     |
|                           | p-value                     | 1                     | 1                     | 1   |
| Dementia                  | SARS-CoV-2 Group            | 3.26                  | 2.68                  |     |
|                           | Viral LRTI Comparison Group | 2.24                  | 2.39                  |     |
|                           | Risk Difference             | 1.02 (0.39 to 1.56)   | 0.29 (-0.26 to 0.86)  |     |
|                           | p-value                     | <0.001                | 1                     | 0.2 |
| Guillain-Barre Syndrome   | SARS-CoV-2 Group            | 0.02                  | 0.03                  |     |

|                          |                             |                       |                       |   |
|--------------------------|-----------------------------|-----------------------|-----------------------|---|
|                          | Viral LRTI Comparison Group | 0.01                  | 0.02                  |   |
|                          | Risk Difference             | 0.01 (-0.03 to 0.05)  | 0.02 (-0.03 to 0.07)  |   |
|                          | p-value                     | 1                     | 1                     | 1 |
| <b>Diabetes</b>          |                             |                       |                       |   |
| Type 2 Diabetes          | SARS-CoV-2 Group            | 2.77                  | 3.42                  |   |
|                          | Viral LRTI Comparison Group | 2.28                  | 3.14                  |   |
|                          | Risk Difference             | 0.49 (-0.23 to 1.11)  | 0.28 (-0.59 to 1.18)  |   |
|                          | p-value                     | 1                     | 1                     | 1 |
| <b>Liver</b>             |                             |                       |                       |   |
| Liver Test Abnormality   | SARS-CoV-2 Group            | 1.64                  | 1.91                  |   |
|                          | Viral LRTI Comparison Group | 2.01                  | 2.43                  |   |
|                          | Risk Difference             | -0.37 (-0.74 to 0.04) | -0.52 (-0.97 to 0.02) |   |
|                          | p-value                     | 1                     | 1                     | 1 |
| <b>Nephrology</b>        |                             |                       |                       |   |
| Kidney Injury            | SARS-CoV-2 Group            | 6.01                  | 7.88                  |   |
|                          | Viral LRTI Comparison Group | 6.18                  | 7.5                   |   |
|                          | Risk Difference             | -0.17 (-0.99 to 0.79) | 0.39 (-0.76 to 1.42)  |   |
|                          | p-value                     | 1                     | 1                     | 1 |
| > Chronic Kidney Disease | SARS-CoV-2 Group            | 4.02                  | 5.01                  |   |
|                          | Viral LRTI Comparison Group | 4.66                  | 5.27                  |   |
|                          | Risk Difference             | -0.64 (-1.31 to 0.01) | -0.26 (-1.14 to 0.73) |   |
|                          | p-value                     | 1                     | 1                     | 1 |
| > Acute Kidney Injury    | SARS-CoV-2 Group            | 3.92                  | 5.6                   |   |
|                          | Viral LRTI Comparison Group | 4.07                  | 5.82                  |   |
|                          | Risk Difference             | -0.16 (-0.65 to 0.38) | -0.21 (-1.05 to 0.53) |   |
|                          | p-value                     | 1                     | 1                     | 1 |
| <b>Respiratory</b>       |                             |                       |                       |   |
| Respiratory Failure      | SARS-CoV-2 Group            | 7.61                  | 10.92                 |   |



|                                  |                             |                        |                       |        |
|----------------------------------|-----------------------------|------------------------|-----------------------|--------|
|                                  | Viral LRTI Comparison Group | 5.99                   | 7.33                  |        |
|                                  | Risk Difference             | 1.63 (0.94 to 2.24)    | 3.59 (2.63 to 4.57)   |        |
|                                  | p-value                     | <0.001                 | <0.001                | <0.001 |
| > Acute Respiratory Failure      | SARS-CoV-2 Group            | 6.66                   | 9.78                  |        |
|                                  | Viral LRTI Comparison Group | 4.28                   | 5.39                  |        |
|                                  | Risk Difference             | 2.38 (1.74 to 2.97)    | 4.39 (3.63 to 5.07)   |        |
|                                  | p-value                     | <0.001                 | <0.001                | <0.001 |
| > Chronic Respiratory Failure    | SARS-CoV-2 Group            | 1.33                   | 1.61                  |        |
|                                  | Viral LRTI Comparison Group | 1.7                    | 1.87                  |        |
|                                  | Risk Difference             | -0.38 (-0.74 to -0.05) | -0.26 (-0.66 to 0.18) |        |
|                                  | p-value                     | 1                      | 1                     | 1      |
| > Interstitial Lung Disease      | SARS-CoV-2 Group            | 1.16                   | 1.56                  |        |
|                                  | Viral LRTI Comparison Group | 1.51                   | 2                     |        |
|                                  | Risk Difference             | -0.35 (-0.68 to -0.01) | -0.44 (-0.86 to 0)    |        |
|                                  | p-value                     | 1                      | 1                     | 1      |
| <b>Dermatologic</b>              |                             |                        |                       |        |
| Atopic Dermatitis                | SARS-CoV-2 Group            | 0.27                   | 0.24                  |        |
|                                  | Viral LRTI Comparison Group | 0.3                    | 0.34                  |        |
|                                  | Risk Difference             | -0.03 (-0.18 to 0.11)  | -0.1 (-0.3 to 0.07)   |        |
|                                  | p-value                     | 1                      | 1                     | 1      |
| Urticaria                        | SARS-CoV-2 Group            | 0.21                   | 0.15                  |        |
|                                  | Viral LRTI Comparison Group | 0.36                   | 0.12                  |        |
|                                  | Risk Difference             | -0.15 (-0.33 to -0.01) | 0.03 (-0.1 to 0.15)   |        |
|                                  | p-value                     | 1                      | 1                     | 0.44   |
| Herpesviral Vesicular Dermatitis | SARS-CoV-2 Group            | 0.07                   | 0.08                  |        |

|                   |                             |                       |                        |   |
|-------------------|-----------------------------|-----------------------|------------------------|---|
|                   | Viral LRTI Comparison Group | 0.08                  | 0.03                   |   |
|                   | Risk Difference             | -0.01 (-0.08 to 0.07) | 0.05 (-0.02 to 0.13)   |   |
|                   | p-value                     | 1                     | 1                      | 1 |
| <b>Others</b>     |                             |                       |                        |   |
| Sleep Apnea       | SARS-CoV-2 Group            | 1.17                  | 1.94                   |   |
|                   | Viral LRTI Comparison Group | 1.83                  | 2.73                   |   |
|                   | Risk Difference             | -0.66 (-1 to -0.3)    | -0.79 (-1.36 to -0.15) |   |
|                   | p-value                     | 1                     | 1                      | 1 |
| <b>Hematology</b> |                             |                       |                        |   |
| Thrombocytopenia  | SARS-CoV-2 Group            | 0.63                  | 1.22                   |   |
|                   | Viral LRTI Comparison Group | 0.86                  | 1.33                   |   |
|                   | Risk Difference             | -0.22 (-0.5 to 0.03)  | -0.1 (-0.5 to 0.26)    |   |
|                   | p-value                     | 1                     | 1                      | 1 |
| Leukopenia        | SARS-CoV-2 Group            | 0.29                  | 0.28                   |   |
|                   | Viral LRTI Comparison Group | 0.22                  | 0.32                   |   |
|                   | Risk Difference             | 0.07 (-0.07 to 0.22)  | -0.04 (-0.21 to 0.15)  |   |
|                   | p-value                     | 1                     | 1                      | 1 |
| Anemia            | SARS-CoV-2 Group            | 3.34                  | 3.18                   |   |
|                   | Viral LRTI Comparison Group | 3.49                  | 3.56                   |   |
|                   | Risk Difference             | -0.16 (-0.7 to 0.39)  | -0.38 (-0.96 to 0.32)  |   |
|                   | p-value                     | 1                     | 1                      | 1 |
| <b>Symptom</b>    |                             |                       |                        |   |
| Myalgia           | SARS-CoV-2 Group            | 8.87                  | 7                      |   |
|                   | Viral LRTI Comparison Group | 9.47                  | 7.92                   |   |
|                   | Risk Difference             | -0.6 (-1.79 to 0.65)  | -0.92 (-2.08 to 0.24)  |   |
|                   | p-value                     | 1                     | 1                      | 1 |
| Fatigue Diagnosis | SARS-CoV-2 Group            | 11.41                 | 10.74                  |   |
|                   | Viral LRTI Comparison Group | 11.4                  | 10.53                  |   |

|                      |                             |                      |                       |      |
|----------------------|-----------------------------|----------------------|-----------------------|------|
|                      | Risk Difference             | 0 (-1.17 to 1.14)    | 0.21 (-0.98 to 1.53)  |      |
|                      | p-value                     | 1                    | 1                     | 1    |
| > Fatigue            | SARS-CoV-2 Group            | 11.27                | 10.6                  |      |
|                      | Viral LRTI Comparison Group | 11.38                | 10.49                 |      |
|                      | Risk Difference             | -0.11 (-1.4 to 1.05) | 0.11 (-0.98 to 1.67)  |      |
|                      | p-value                     | 1                    | 1                     | 1    |
| > Chronic Fatigue    | SARS-CoV-2 Group            | 0.42                 | 0.3                   |      |
|                      | Viral LRTI Comparison Group | 0.5                  | 0.31                  |      |
|                      | Risk Difference             | -0.09 (-0.3 to 0.11) | -0.01 (-0.22 to 0.16) |      |
|                      | p-value                     | 1                    | 1                     | 1    |
| > Post-viral Fatigue | SARS-CoV-2 Group            | 0.27                 | 0.19                  |      |
|                      | Viral LRTI Comparison Group | 0.04                 | 0.07                  |      |
|                      | Risk Difference             | 0.23 (0.12 to 0.34)  | 0.13 (-0.01 to 0.24)  |      |
|                      | p-value                     | <0.001               | 0.11                  | 0.31 |
| Anosmia              | SARS-CoV-2 Group            | 0.07                 | 0.06                  |      |
|                      | Viral LRTI Comparison Group | 0.04                 | 0.02                  |      |
|                      | Risk Difference             | 0.03 (-0.03 to 0.1)  | 0.04 (-0.03 to 0.13)  |      |
|                      | p-value                     | 1                    | 1                     | 1    |

Subgroups are subpopulations of the SARS-CoV-2 and viral LRTI cohorts.

Cumulative incidence was obtained by Kaplan-Meier estimator at 120 days after the start of the post-acute phase (141 days after index date).

Confidence intervals were calculated based on Bonferroni correction, i.e.,  $(1 - 0.05/(N \times \text{number of subgroup levels}))$  confidence interval.

Individuals were excluded if they had less than 21 days of observation from the index date, had already been diagnosed with the outcome of interest prior to acute phase, or their matched pair was excluded for the same reasons.

Table 5I: Cumulative Incidence and Risk Difference per 100 Individuals of the SARS-CoV-2 and Viral LRTI Comparison Group for Clinical Sequelae in the Post-Acute Phase by COVID Hospitalization

| Clinical Sequelae               | Category                    | Not hospitalized with COVID | Hospitalized with COVID | p-interaction |
|---------------------------------|-----------------------------|-----------------------------|-------------------------|---------------|
|                                 | Matched Group Size          | 50,512 vs 50,512            | 22,861 vs 22,861        |               |
| <b>Hypertension</b>             |                             |                             |                         |               |
| Hypertension                    | SARS-CoV-2 Group            | 11.01                       | 23.06                   |               |
|                                 | Viral LRTI Comparison Group | 15.47                       | 15.69                   |               |
|                                 | Risk Difference             | -4.46 (-8.14 to -0.37)      | 7.37 (-3.39 to 16.69)   |               |
|                                 | p-value                     | 1                           | 1                       | 0.97          |
| <b>Pulmonary Hypertension</b>   |                             |                             |                         |               |
| Pulmonary Hypertension          | SARS-CoV-2 Group            | 0.73                        | 1.73                    |               |
|                                 | Viral LRTI Comparison Group | 1.52                        | 1.98                    |               |
|                                 | Risk Difference             | -0.78 (-1.04 to -0.52)      | -0.25 (-0.8 to 0.26)    |               |
|                                 | p-value                     | 1                           | 1                       | 1             |
| <b>Cardiology</b>               |                             |                             |                         |               |
| <b>Cardiac Rhythm Disorders</b> |                             |                             |                         |               |
| Cardiac Rhythm Disorders        | SARS-CoV-2 Group            | 3.34                        | 9.5                     |               |
|                                 | Viral LRTI Comparison Group | 5.35                        | 6.47                    |               |
|                                 | Risk Difference             | -2.01 (-2.57 to -1.38)      | 3.03 (1.67 to 4.09)     |               |
|                                 | p-value                     | 1                           | <0.001                  | <0.001        |
| <b>&gt; Cardiac Arrhythmia</b>  |                             |                             |                         |               |
| > Cardiac Arrhythmia            | SARS-CoV-2 Group            | 2.03                        | 5.05                    |               |
|                                 | Viral LRTI Comparison Group | 3.1                         | 4.26                    |               |
|                                 | Risk Difference             | -1.06 (-1.56 to -0.61)      | 0.79 (-0.18 to 1.84)    |               |
|                                 | p-value                     | 1                           | 0.42                    | <0.001        |
| <b>&gt; Tachycardia</b>         |                             |                             |                         |               |
| > Tachycardia                   | SARS-CoV-2 Group            | 1.88                        | 6.24                    |               |
|                                 | Viral LRTI Comparison Group | 2.97                        | 3.44                    |               |
|                                 | Risk Difference             | -1.09 (-1.49 to -0.72)      | 2.79 (2 to 3.68)        |               |
|                                 | p-value                     | 1                           | <0.001                  | <0.001        |
| <b>&gt; POTs</b>                |                             |                             |                         |               |
| > POTs                          | SARS-CoV-2 Group            | 0.77                        | 2.08                    |               |

|                                |                             |                        |                       |        |
|--------------------------------|-----------------------------|------------------------|-----------------------|--------|
|                                | Viral LRTI Comparison Group | 1.2                    | 1.52                  |        |
|                                | Risk Difference             | -0.43 (-0.67 to -0.21) | 0.57 (0.02 to 1.13)   |        |
|                                | p-value                     | 1                      | <0.001                | 0.04   |
| CHF Cardiomyopathy Myocarditis | SARS-CoV-2 Group            | 2.14                   | 6.27                  |        |
|                                | Viral LRTI Comparison Group | 5.4                    | 6.91                  |        |
|                                | Risk Difference             | -3.26 (-3.76 to -2.55) | -0.65 (-1.79 to 0.48) |        |
|                                | p-value                     | 1                      | 1                     | <0.001 |
| > Congestive Heart Failure     | SARS-CoV-2 Group            | 1.9                    | 5.67                  |        |
|                                | Viral LRTI Comparison Group | 4.78                   | 6.21                  |        |
|                                | Risk Difference             | -2.88 (-3.34 to -2.41) | -0.54 (-1.51 to 0.66) |        |
|                                | p-value                     | 1                      | 1                     | <0.001 |
| > Cardiomyopathy               | SARS-CoV-2 Group            | 0.78                   | 1.96                  |        |
|                                | Viral LRTI Comparison Group | 1.76                   | 2.19                  |        |
|                                | Risk Difference             | -0.98 (-1.32 to -0.67) | -0.23 (-0.81 to 0.52) |        |
|                                | p-value                     | 1                      | 1                     | 1      |
| > Myocarditis                  | SARS-CoV-2 Group            | 0.01                   | 0.11                  |        |
|                                | Viral LRTI Comparison Group | 0.02                   | 0.01                  |        |
|                                | Risk Difference             | 0 (-0.04 to 0.03)      | 0.1 (0 to 0.22)       |        |
|                                | p-value                     | 1                      | 0.11                  | 0.006  |
| Coronary Disease               | SARS-CoV-2 Group            | 1.15                   | 3.42                  |        |
|                                | Viral LRTI Comparison Group | 2.08                   | 2.83                  |        |
|                                | Risk Difference             | -0.93 (-1.27 to -0.63) | 0.59 (-0.11 to 1.38)  |        |
|                                | p-value                     | 1                      | 0.74                  | <0.001 |
| > Myocardial Infarction        | SARS-CoV-2 Group            | 0.91                   | 3                     |        |
|                                | Viral LRTI Comparison Group | 1.66                   | 2.52                  |        |
|                                | Risk Difference             | -0.74 (-1.01 to -0.45) | 0.48 (-0.14 to 1.12)  |        |

|                               |                             |                        |                       |        |
|-------------------------------|-----------------------------|------------------------|-----------------------|--------|
|                               | p-value                     | 1                      | 1                     | <0.001 |
| > Acute Coronary Syndrome     | SARS-CoV-2 Group            | 1.14                   | 3.38                  |        |
|                               | Viral LRTI Comparison Group | 2.08                   | 2.81                  |        |
|                               | Risk Difference             | -0.94 (-1.29 to -0.65) | 0.57 (-0.1 to 1.22)   |        |
|                               | p-value                     | 1                      | 0.32                  | <0.001 |
| Cardiogenic Shock             | SARS-CoV-2 Group            | 0.08                   | 0.3                   |        |
|                               | Viral LRTI Comparison Group | 0.17                   | 0.35                  |        |
|                               | Risk Difference             | -0.09 (-0.17 to 0)     | -0.05 (-0.29 to 0.22) |        |
|                               | p-value                     | 1                      | 1                     | 1      |
| Hypercoagulability DVT PE PAO | SARS-CoV-2 Group            | 2.11                   | 7.46                  |        |
|                               | Viral LRTI Comparison Group | 3.19                   | 4.19                  |        |
|                               | Risk Difference             | -1.08 (-1.53 to -0.69) | 3.27 (2.32 to 4.31)   |        |
|                               | p-value                     | 1                      | <0.001                | <0.001 |
| > Hypercoagulability          | SARS-CoV-2 Group            | 1.59                   | 5.06                  |        |
|                               | Viral LRTI Comparison Group | 2.28                   | 2.99                  |        |
|                               | Risk Difference             | -0.69 (-1.03 to -0.37) | 2.07 (1.2 to 2.84)    |        |
|                               | p-value                     | 1                      | <0.001                | <0.001 |
| > Deep Vein Thrombosis        | SARS-CoV-2 Group            | 1.06                   | 3.79                  |        |
|                               | Viral LRTI Comparison Group | 1.59                   | 2.03                  |        |
|                               | Risk Difference             | -0.53 (-0.82 to -0.25) | 1.76 (1.12 to 2.35)   |        |
|                               | p-value                     | 1                      | <0.001                | <0.001 |
| > Pulmonary Embolism          | SARS-CoV-2 Group            | 0.62                   | 3                     |        |
|                               | Viral LRTI Comparison Group | 1.08                   | 1.27                  |        |
|                               | Risk Difference             | -0.46 (-0.7 to -0.23)  | 1.73 (1.17 to 2.2)    |        |
|                               | p-value                     | 1                      | <0.001                | <0.001 |

|                                   |                             |                        |                       |        |
|-----------------------------------|-----------------------------|------------------------|-----------------------|--------|
| > Peripheral Arterial Occlusions  | SARS-CoV-2 Group            | 0.26                   | 0.75                  |        |
|                                   | Viral LRTI Comparison Group | 0.44                   | 0.76                  |        |
|                                   | Risk Difference             | -0.18 (-0.33 to -0.03) | -0.01 (-0.32 to 0.35) |        |
|                                   | p-value                     | 1                      | 1                     | 1      |
| Stroke and Sequelae               | SARS-CoV-2 Group            | 1.63                   | 4.54                  |        |
|                                   | Viral LRTI Comparison Group | 2.57                   | 3.29                  |        |
|                                   | Risk Difference             | -0.95 (-1.32 to -0.64) | 1.25 (0.55 to 2.11)   |        |
|                                   | p-value                     | 1                      | <0.001                | <0.001 |
| > Ischemic Stroke and Sequelae    | SARS-CoV-2 Group            | 1.44                   | 4.13                  |        |
|                                   | Viral LRTI Comparison Group | 2.31                   | 2.91                  |        |
|                                   | Risk Difference             | -0.88 (-1.22 to -0.54) | 1.21 (0.43 to 2.14)   |        |
|                                   | p-value                     | 1                      | <0.001                | <0.001 |
| > Hemorrhagic Stroke and Sequelae | SARS-CoV-2 Group            | 0.99                   | 2.66                  |        |
|                                   | Viral LRTI Comparison Group | 1.51                   | 2.08                  |        |
|                                   | Risk Difference             | -0.52 (-0.78 to -0.21) | 0.59 (0.03 to 1.17)   |        |
|                                   | p-value                     | 1                      | <0.001                | <0.001 |
| <b>Mental Health</b>              |                             |                        |                       |        |
| Mental Health Diagnosis           | SARS-CoV-2 Group            | 5.1                    | 8.28                  |        |
|                                   | Viral LRTI Comparison Group | 5.83                   | 6.53                  |        |
|                                   | Risk Difference             | -0.72 (-1.38 to -0.05) | 1.76 (0.6 to 3.48)    |        |
|                                   | p-value                     | 1                      | <0.001                | 0.03   |
| Psychosis                         | SARS-CoV-2 Group            | 0.25                   | 0.67                  |        |
|                                   | Viral LRTI Comparison Group | 0.29                   | 0.43                  |        |
|                                   | Risk Difference             | -0.04 (-0.17 to 0.09)  | 0.24 (-0.08 to 0.56)  |        |
|                                   | p-value                     | 1                      | 1                     | 0.56   |

|                           |                             |                        |                       |        |
|---------------------------|-----------------------------|------------------------|-----------------------|--------|
| <b>Neurologic</b>         |                             |                        |                       |        |
| Amnesia/Memory Difficulty | SARS-CoV-2 Group            | 3.64                   | 11.47                 |        |
|                           | Viral LRTI Comparison Group | 5.12                   | 6.89                  |        |
|                           | Risk Difference             | -1.48 (-2 to -0.98)    | 4.58 (3.11 to 5.81)   |        |
|                           | p-value                     | 1                      | <0.001                | <0.001 |
| Migraine                  | SARS-CoV-2 Group            | 0.36                   | 0.18                  |        |
|                           | Viral LRTI Comparison Group | 0.34                   | 0.33                  |        |
|                           | Risk Difference             | 0.02 (-0.15 to 0.21)   | -0.15 (-0.38 to 0.08) |        |
|                           | p-value                     | 1                      | 1                     | 0.19   |
| Peripheral Neuropathy     | SARS-CoV-2 Group            | 0.84                   | 1.17                  |        |
|                           | Viral LRTI Comparison Group | 1.09                   | 1.34                  |        |
|                           | Risk Difference             | -0.24 (-0.49 to 0.04)  | -0.17 (-0.61 to 0.36) |        |
|                           | p-value                     | 1                      | 1                     | 1      |
| Encephalopathy            | SARS-CoV-2 Group            | 1.45                   | 7.07                  |        |
|                           | Viral LRTI Comparison Group | 2.24                   | 3.57                  |        |
|                           | Risk Difference             | -0.79 (-1.15 to -0.44) | 3.5 (2.6 to 4.55)     |        |
|                           | p-value                     | 1                      | <0.001                | <0.001 |
| Seizure                   | SARS-CoV-2 Group            | 0.41                   | 0.99                  |        |
|                           | Viral LRTI Comparison Group | 0.51                   | 0.73                  |        |
|                           | Risk Difference             | -0.1 (-0.26 to 0.09)   | 0.26 (-0.18 to 0.63)  |        |
|                           | p-value                     | 1                      | 1                     | 1      |
| Dementia                  | SARS-CoV-2 Group            | 2.2                    | 5.32                  |        |
|                           | Viral LRTI Comparison Group | 2.15                   | 3.23                  |        |
|                           | Risk Difference             | 0.06 (-0.32 to 0.49)   | 2.09 (1.29 to 3.14)   |        |
|                           | p-value                     | 1                      | <0.001                | <0.001 |
| Guillain-Barre Syndrome   | SARS-CoV-2 Group            | 0.02                   | 0.04                  |        |



|                          |                             |                        |                       |        |
|--------------------------|-----------------------------|------------------------|-----------------------|--------|
|                          | Viral LRTI Comparison Group | 0.01                   | 0.01                  |        |
|                          | Risk Difference             | 0.01 (-0.01 to 0.04)   | 0.03 (-0.03 to 0.1)   |        |
|                          | p-value                     | 1                      | 1                     | 1      |
| <b>Diabetes</b>          |                             |                        |                       |        |
| Type 2 Diabetes          | SARS-CoV-2 Group            | 2.39                   | 5.27                  |        |
|                          | Viral LRTI Comparison Group | 2.38                   | 2.79                  |        |
|                          | Risk Difference             | 0.01 (-0.67 to 0.56)   | 2.47 (0.98 to 4.01)   |        |
|                          | p-value                     | 1                      | <0.001                | <0.001 |
| <b>Liver</b>             |                             |                        |                       |        |
| Liver Test Abnormality   | SARS-CoV-2 Group            | 1.55                   | 2.19                  |        |
|                          | Viral LRTI Comparison Group | 1.96                   | 2.32                  |        |
|                          | Risk Difference             | -0.4 (-0.79 to -0.06)  | -0.14 (-0.76 to 0.58) |        |
|                          | p-value                     | 1                      | 1                     | 1      |
| <b>Nephrology</b>        |                             |                        |                       |        |
| Kidney Injury            | SARS-CoV-2 Group            | 5.06                   | 13.53                 |        |
|                          | Viral LRTI Comparison Group | 6.7                    | 8.68                  |        |
|                          | Risk Difference             | -1.64 (-2.42 to -0.89) | 4.84 (3.04 to 6.63)   |        |
|                          | p-value                     | 1                      | <0.001                | <0.001 |
| > Chronic Kidney Disease | SARS-CoV-2 Group            | 3.82                   | 7.17                  |        |
|                          | Viral LRTI Comparison Group | 5.05                   | 6.49                  |        |
|                          | Risk Difference             | -1.22 (-1.92 to -0.59) | 0.68 (-0.77 to 2)     |        |
|                          | p-value                     | 1                      | 1                     | 0.57   |
| > Acute Kidney Injury    | SARS-CoV-2 Group            | 2.52                   | 11.54                 |        |
|                          | Viral LRTI Comparison Group | 4.56                   | 6.41                  |        |
|                          | Risk Difference             | -2.05 (-2.62 to -1.62) | 5.13 (3.85 to 6.45)   |        |
|                          | p-value                     | 1                      | <0.001                | <0.001 |
| <b>Respiratory</b>       |                             |                        |                       |        |
| Respiratory Failure      | SARS-CoV-2 Group            | 3.63                   | 26.09                 |        |

|                                  |                             |                        |                        |        |
|----------------------------------|-----------------------------|------------------------|------------------------|--------|
|                                  | Viral LRTI Comparison Group | 6.39                   | 8.21                   |        |
|                                  | Risk Difference             | -2.76 (-3.36 to -2.2)  | 17.88 (16.51 to 19.22) |        |
|                                  | p-value                     | 1                      | <0.001                 | <0.001 |
| > Acute Respiratory Failure      | SARS-CoV-2 Group            | 2.81                   | 23.81                  |        |
|                                  | Viral LRTI Comparison Group | 4.62                   | 6.24                   |        |
|                                  | Risk Difference             | -1.8 (-2.32 to -1.35)  | 17.57 (16.39 to 18.67) |        |
|                                  | p-value                     | 1                      | <0.001                 | <0.001 |
| > Chronic Respiratory Failure    | SARS-CoV-2 Group            | 0.73                   | 3.72                   |        |
|                                  | Viral LRTI Comparison Group | 1.62                   | 2.33                   |        |
|                                  | Risk Difference             | -0.89 (-1.17 to -0.6)  | 1.39 (0.66 to 2.1)     |        |
|                                  | p-value                     | 1                      | <0.001                 | <0.001 |
| > Interstitial Lung Disease      | SARS-CoV-2 Group            | 0.83                   | 2.93                   |        |
|                                  | Viral LRTI Comparison Group | 1.7                    | 1.99                   |        |
|                                  | Risk Difference             | -0.87 (-1.17 to -0.6)  | 0.95 (0.17 to 1.64)    |        |
|                                  | p-value                     | 1                      | <0.001                 | <0.001 |
| <b>Dermatologic</b>              |                             |                        |                        |        |
| Atopic Dermatitis                | SARS-CoV-2 Group            | 0.27                   | 0.28                   |        |
|                                  | Viral LRTI Comparison Group | 0.37                   | 0.29                   |        |
|                                  | Risk Difference             | -0.09 (-0.22 to 0.06)  | -0.01 (-0.26 to 0.18)  |        |
|                                  | p-value                     | 1                      | 1                      | 1      |
| Urticaria                        | SARS-CoV-2 Group            | 0.15                   | 0.27                   |        |
|                                  | Viral LRTI Comparison Group | 0.28                   | 0.24                   |        |
|                                  | Risk Difference             | -0.13 (-0.26 to -0.02) | 0.03 (-0.18 to 0.25)   |        |
|                                  | p-value                     | 1                      | 1                      | 1      |
| Herpesviral Vesicular Dermatitis | SARS-CoV-2 Group            | 0.07                   | 0.08                   |        |

|                   |                             |                        |                       |        |
|-------------------|-----------------------------|------------------------|-----------------------|--------|
|                   | Viral LRTI Comparison Group | 0.05                   | 0.04                  |        |
|                   | Risk Difference             | 0.02 (-0.04 to 0.08)   | 0.04 (-0.06 to 0.13)  |        |
|                   | p-value                     | 1                      | 1                     | 1      |
| <b>Others</b>     |                             |                        |                       |        |
| Sleep Apnea       | SARS-CoV-2 Group            | 1.19                   | 2.36                  |        |
|                   | Viral LRTI Comparison Group | 2.14                   | 2.42                  |        |
|                   | Risk Difference             | -0.95 (-1.27 to -0.59) | -0.06 (-0.74 to 0.67) |        |
|                   | p-value                     | 1                      | 1                     | 0.18   |
| <b>Hematology</b> |                             |                        |                       |        |
| Thrombocytopenia  | SARS-CoV-2 Group            | 0.65                   | 1.69                  |        |
|                   | Viral LRTI Comparison Group | 0.99                   | 1.22                  |        |
|                   | Risk Difference             | -0.34 (-0.55 to -0.09) | 0.47 (-0.02 to 0.99)  |        |
|                   | p-value                     | 1                      | 0.11                  | <0.001 |
| Leukopenia        | SARS-CoV-2 Group            | 0.19                   | 0.47                  |        |
|                   | Viral LRTI Comparison Group | 0.2                    | 0.33                  |        |
|                   | Risk Difference             | 0 (-0.11 to 0.11)      | 0.15 (-0.11 to 0.38)  |        |
|                   | p-value                     | 1                      | 1                     | 0.56   |
| Anemia            | SARS-CoV-2 Group            | 2.52                   | 5.2                   |        |
|                   | Viral LRTI Comparison Group | 3.43                   | 4.16                  |        |
|                   | Risk Difference             | -0.91 (-1.51 to -0.38) | 1.04 (-0.01 to 1.98)  |        |
|                   | p-value                     | 1                      | 0.11                  | 0.01   |
| <b>Symptom</b>    |                             |                        |                       |        |
| Myalgia           | SARS-CoV-2 Group            | 7.09                   | 11.16                 |        |
|                   | Viral LRTI Comparison Group | 8.42                   | 10.36                 |        |
|                   | Risk Difference             | -1.33 (-2.27 to -0.25) | 0.81 (-0.84 to 2.79)  |        |
|                   | p-value                     | 1                      | 1                     | 1      |
| Fatigue Diagnosis | SARS-CoV-2 Group            | 8                      | 21.15                 |        |
|                   | Viral LRTI Comparison Group | 10.76                  | 12.29                 |        |

|                      |                             |                        |                      |        |
|----------------------|-----------------------------|------------------------|----------------------|--------|
|                      | Risk Difference             | -2.76 (-3.59 to -1.98) | 8.86 (6.96 to 11.11) |        |
|                      | p-value                     | 1                      | <0.001               | <0.001 |
| > Fatigue            | SARS-CoV-2 Group            | 7.9                    | 20.9                 |        |
|                      | Viral LRTI Comparison Group | 10.72                  | 12.25                |        |
|                      | Risk Difference             | -2.82 (-3.75 to -1.93) | 8.65 (6.29 to 10.52) |        |
|                      | p-value                     | 1                      | <0.001               | <0.001 |
| > Chronic Fatigue    | SARS-CoV-2 Group            | 0.32                   | 0.62                 |        |
|                      | Viral LRTI Comparison Group | 0.42                   | 0.47                 |        |
|                      | Risk Difference             | -0.1 (-0.24 to 0.05)   | 0.15 (-0.14 to 0.47) |        |
|                      | p-value                     | 1                      | 1                    | 1      |
| > Post-viral Fatigue | SARS-CoV-2 Group            | 0.16                   | 0.46                 |        |
|                      | Viral LRTI Comparison Group | 0.05                   | 0.07                 |        |
|                      | Risk Difference             | 0.11 (0.04 to 0.17)    | 0.38 (0.2 to 0.59)   |        |
|                      | p-value                     | <0.001                 | <0.001               | 0.009  |
| Anosmia              | SARS-CoV-2 Group            | 0.06                   | 0.07                 |        |
|                      | Viral LRTI Comparison Group | 0.03                   | 0.02                 |        |
|                      | Risk Difference             | 0.03 (-0.03 to 0.09)   | 0.05 (-0.04 to 0.16) |        |
|                      | p-value                     | 1                      | 1                    | 1      |

Subgroups are subpopulations of the SARS-CoV-2 and viral LRTI cohorts.

Hospitalized with COVID subpopulation compares SARS-CoV-2 infected individuals hospitalized due to COVID and individuals within the viral LRTI comparison group. Meanwhile, Not hospitalized with COVID subpopulation compares SARS-CoV-2 infected individuals not hospitalized due to COVID and individuals within the viral LRTI comparison group.

Cumulative incidence was obtained by Kaplan-Meier estimator at 120 days after the start of the post-acute phase (141 days after index date).

Confidence intervals were calculated based on Bonferroni correction, i.e.,  $(1 - 0.05/(N \times \text{number of subgroup levels}))$  confidence interval.

Individuals were excluded if they had less than 21 days of observation from the index date, had already been diagnosed with the outcome of interest prior to acute phase, or their matched pair was excluded for the same reasons.

Table 6a: Clinical Event Counts by Persistent and New Onset Outcomes of the Matched SARS-CoV-2 Group and 2020 Comparison Group

| <b>Clinical Sequelae</b>              | <b>Category</b>       | <b>Total at Risk</b> | <b>Total with Post-acute Outcome</b> | <b>Persistent</b> | <b>New Onset</b> |
|---------------------------------------|-----------------------|----------------------|--------------------------------------|-------------------|------------------|
| <b>Hypertension</b>                   |                       |                      |                                      |                   |                  |
| Hypertension                          | SARS-CoV-2 Group      | 5,664                | 513                                  | 178 (35%)         | 335 (65%)        |
|                                       | 2020 Comparison Group | 5,664                | 347                                  | 38 (11%)          | 309 (89%)        |
| <b>Pulmonary Hypertension</b>         |                       |                      |                                      |                   |                  |
| Pulmonary Hypertension                | SARS-CoV-2 Group      | 82,315               | 577                                  | 85 (15%)          | 492 (85%)        |
|                                       | 2020 Comparison Group | 82,315               | 420                                  | 36 (8.6%)         | 384 (91%)        |
| <b>Cardiology</b>                     |                       |                      |                                      |                   |                  |
| <b>Cardiac Rhythm Disorders</b>       |                       |                      |                                      |                   |                  |
| Cardiac Rhythm Disorders              | SARS-CoV-2 Group      | 67,540               | 2,387                                | 541 (23%)         | 1,846 (77%)      |
|                                       | 2020 Comparison Group | 67,540               | 1,370                                | 110 (8%)          | 1,260 (92%)      |
| <b>&gt; Cardiac Arrhythmia</b>        |                       |                      |                                      |                   |                  |
| > Cardiac Arrhythmia                  | SARS-CoV-2 Group      | 73,765               | 1,494                                | 251 (17%)         | 1,243 (83%)      |
|                                       | 2020 Comparison Group | 73,765               | 1,021                                | 76 (7.4%)         | 945 (93%)        |
| <b>&gt; Tachycardia</b>               |                       |                      |                                      |                   |                  |
| > Tachycardia                         | SARS-CoV-2 Group      | 77,356               | 1,640                                | 320 (20%)         | 1,320 (80%)      |
|                                       | 2020 Comparison Group | 77,356               | 813                                  | 50 (6.2%)         | 763 (94%)        |
| <b>&gt; POTs</b>                      |                       |                      |                                      |                   |                  |
| > POTs                                | SARS-CoV-2 Group      | 82,748               | 688                                  | 93 (14%)          | 595 (86%)        |
|                                       | 2020 Comparison Group | 82,748               | 436                                  | 20 (4.6%)         | 416 (95%)        |
| <b>CHF Cardiomyopathy Myocarditis</b> |                       |                      |                                      |                   |                  |
| CHF Cardiomyopathy Myocarditis        | SARS-CoV-2 Group      | 68,327               | 1,558                                | 516 (33%)         | 1,042 (67%)      |
|                                       | 2020 Comparison Group | 68,327               | 936                                  | 129 (14%)         | 807 (86%)        |

|                                  |                       |        |       |           |             |
|----------------------------------|-----------------------|--------|-------|-----------|-------------|
| > Congestive Heart Failure       | SARS-CoV-2 Group      | 71,721 | 1,454 | 476 (33%) | 978 (67%)   |
|                                  | 2020 Comparison Group | 71,721 | 854   | 113 (13%) | 741 (87%)   |
| > Cardiomyopathy                 | SARS-CoV-2 Group      | 79,362 | 624   | 158 (25%) | 466 (75%)   |
|                                  | 2020 Comparison Group | 79,362 | 464   | 65 (14%)  | 399 (86%)   |
| > Myocarditis                    | SARS-CoV-2 Group      | 87,311 | 25    | 9 (36%)   | 16 (64%)    |
|                                  | 2020 Comparison Group | 87,311 | 5     | 0 (0%)    | 5 (100%)    |
| Coronary Disease                 | SARS-CoV-2 Group      | 81,458 | 1,016 | 349 (34%) | 667 (66%)   |
|                                  | 2020 Comparison Group | 81,458 | 532   | 33 (6.2%) | 499 (94%)   |
| > Myocardial Infarction          | SARS-CoV-2 Group      | 82,925 | 854   | 321 (38%) | 533 (62%)   |
|                                  | 2020 Comparison Group | 82,925 | 425   | 30 (7.1%) | 395 (93%)   |
| > Acute Coronary Syndrome        | SARS-CoV-2 Group      | 81,484 | 1,007 | 343 (34%) | 664 (66%)   |
|                                  | 2020 Comparison Group | 81,484 | 528   | 33 (6.2%) | 495 (94%)   |
| Cardiogenic Shock                | SARS-CoV-2 Group      | 87,038 | 89    | 12 (13%)  | 77 (87%)    |
|                                  | 2020 Comparison Group | 87,038 | 51    | 3 (5.9%)  | 48 (94%)    |
| Hypercoagulability<br>DVT PE PAO | SARS-CoV-2 Group      | 77,100 | 2,087 | 734 (35%) | 1,353 (65%) |
|                                  | 2020 Comparison Group | 77,100 | 708   | 73 (10%)  | 635 (90%)   |
| > Hypercoagulability             | SARS-CoV-2 Group      | 79,515 | 1,420 | 338 (24%) | 1,082 (76%) |
|                                  | 2020 Comparison Group | 79,515 | 538   | 49 (9.1%) | 489 (91%)   |

|                                   |                       |        |       |           |             |
|-----------------------------------|-----------------------|--------|-------|-----------|-------------|
| > Deep Vein Thrombosis            | SARS-CoV-2 Group      | 82,588 | 1,035 | 271 (26%) | 764 (74%)   |
|                                   | 2020 Comparison Group | 82,588 | 310   | 38 (12%)  | 272 (88%)   |
| > Pulmonary Embolism              | SARS-CoV-2 Group      | 84,869 | 882   | 441 (50%) | 441 (50%)   |
|                                   | 2020 Comparison Group | 84,869 | 182   | 24 (13%)  | 158 (87%)   |
| > Peripheral Arterial Occlusions  | SARS-CoV-2 Group      | 85,755 | 260   | 45 (17%)  | 215 (83%)   |
|                                   | 2020 Comparison Group | 85,755 | 148   | 18 (12%)  | 130 (88%)   |
| Stroke and Sequelae               | SARS-CoV-2 Group      | 76,384 | 1,324 | 463 (35%) | 861 (65%)   |
|                                   | 2020 Comparison Group | 76,384 | 744   | 87 (12%)  | 657 (88%)   |
| > Ischemic Stroke and Sequelae    | SARS-CoV-2 Group      | 77,154 | 1,194 | 411 (34%) | 783 (66%)   |
|                                   | 2020 Comparison Group | 77,154 | 674   | 78 (12%)  | 596 (88%)   |
| > Hemorrhagic Stroke and Sequelae | SARS-CoV-2 Group      | 80,975 | 838   | 302 (36%) | 536 (64%)   |
|                                   | 2020 Comparison Group | 80,975 | 443   | 70 (16%)  | 373 (84%)   |
| <b>Mental Health</b>              |                       |        |       |           |             |
| Mental Health Diagnosis           | SARS-CoV-2 Group      | 55,291 | 2,326 | 386 (17%) | 1,940 (83%) |
|                                   | 2020 Comparison Group | 55,291 | 1,469 | 147 (10%) | 1,322 (90%) |
| Psychosis                         | SARS-CoV-2 Group      | 85,892 | 207   | 36 (17%)  | 171 (83%)   |
|                                   | 2020 Comparison Group | 85,892 | 84    | 4 (4.8%)  | 80 (95%)    |
| <b>Neurologic</b>                 |                       |        |       |           |             |

|                           |                       |        |       |            |             |
|---------------------------|-----------------------|--------|-------|------------|-------------|
| Amnesia/Memory Difficulty | SARS-CoV-2 Group      | 69,029 | 2,545 | 774 (30%)  | 1,771 (70%) |
|                           | 2020 Comparison Group | 69,029 | 1,245 | 108 (8.7%) | 1,137 (91%) |
| Migraine                  | SARS-CoV-2 Group      | 85,038 | 198   | 20 (10%)   | 178 (90%)   |
|                           | 2020 Comparison Group | 85,038 | 181   | 9 (5%)     | 172 (95%)   |
| Peripheral Neuropathy     | SARS-CoV-2 Group      | 81,313 | 574   | 50 (8.7%)  | 524 (91%)   |
|                           | 2020 Comparison Group | 81,313 | 498   | 45 (9%)    | 453 (91%)   |
| Encephalopathy            | SARS-CoV-2 Group      | 81,193 | 1,773 | 661 (37%)  | 1,112 (63%) |
|                           | 2020 Comparison Group | 81,193 | 569   | 46 (8.1%)  | 523 (92%)   |
| Seizure                   | SARS-CoV-2 Group      | 84,216 | 338   | 73 (22%)   | 265 (78%)   |
|                           | 2020 Comparison Group | 84,216 | 170   | 16 (9.4%)  | 154 (91%)   |
| Dementia                  | SARS-CoV-2 Group      | 70,963 | 1,302 | 410 (31%)  | 892 (69%)   |
|                           | 2020 Comparison Group | 70,963 | 624   | 68 (11%)   | 556 (89%)   |
| Guillain-Barre Syndrome   | SARS-CoV-2 Group      | 87,281 | 15    | 7 (47%)    | 8 (53%)     |
|                           | 2020 Comparison Group | 87,281 | 3     | 0 (0%)     | 3 (100%)    |
| <b>Diabetes</b>           |                       |        |       |            |             |
| Type 2 Diabetes           | SARS-CoV-2 Group      | 35,386 | 732   | 158 (22%)  | 574 (78%)   |
|                           | 2020 Comparison Group | 35,386 | 417   | 32 (7.7%)  | 385 (92%)   |
| <b>Liver</b>              |                       |        |       |            |             |
| Liver Test Abnormality    | SARS-CoV-2 Group      | 78,201 | 1,006 | 102 (10%)  | 904 (90%)   |



|                               |                       |        |       |             |             |
|-------------------------------|-----------------------|--------|-------|-------------|-------------|
|                               | 2020 Comparison Group | 78,201 | 755   | 35 (4.6%)   | 720 (95%)   |
| <b>Nephrology</b>             |                       |        |       |             |             |
| Kidney Injury                 | SARS-CoV-2 Group      | 50,421 | 2,516 | 1,072 (43%) | 1,444 (57%) |
|                               | 2020 Comparison Group | 50,421 | 1,487 | 162 (11%)   | 1,325 (89%) |
| > Chronic Kidney Disease      | SARS-CoV-2 Group      | 53,146 | 1,632 | 454 (28%)   | 1,178 (72%) |
|                               | 2020 Comparison Group | 53,146 | 1,305 | 150 (11%)   | 1,155 (89%) |
| > Acute Kidney Injury         | SARS-CoV-2 Group      | 74,924 | 2,813 | 1,398 (50%) | 1,415 (50%) |
|                               | 2020 Comparison Group | 74,924 | 1,055 | 89 (8.4%)   | 966 (92%)   |
| <b>Respiratory</b>            |                       |        |       |             |             |
| Respiratory Failure           | SARS-CoV-2 Group      | 75,899 | 5,925 | 4,564 (77%) | 1,361 (23%) |
|                               | 2020 Comparison Group | 75,899 | 849   | 68 (8%)     | 781 (92%)   |
| > Acute Respiratory Failure   | SARS-CoV-2 Group      | 80,457 | 5,685 | 4,534 (80%) | 1,151 (20%) |
|                               | 2020 Comparison Group | 80,457 | 647   | 50 (7.7%)   | 597 (92%)   |
| > Chronic Respiratory Failure | SARS-CoV-2 Group      | 83,978 | 848   | 187 (22%)   | 661 (78%)   |
|                               | 2020 Comparison Group | 83,978 | 202   | 18 (8.9%)   | 184 (91%)   |
| > Interstitial Lung Disease   | SARS-CoV-2 Group      | 83,433 | 778   | 109 (14%)   | 669 (86%)   |
|                               | 2020 Comparison Group | 83,433 | 276   | 12 (4.3%)   | 264 (96%)   |
| <b>Dermatologic</b>           |                       |        |       |             |             |
| Atopic Dermatitis             | SARS-CoV-2 Group      | 85,629 | 161   | 8 (5%)      | 153 (95%)   |

|                                  |                       |        |       |             |             |
|----------------------------------|-----------------------|--------|-------|-------------|-------------|
|                                  | 2020 Comparison Group | 85,629 | 185   | 10 (5.4%)   | 175 (95%)   |
| Urticaria                        | SARS-CoV-2 Group      | 86,291 | 119   | 6 (5%)      | 113 (95%)   |
|                                  | 2020 Comparison Group | 86,291 | 76    | 6 (7.9%)    | 70 (92%)    |
| Herpesviral Vesicular Dermatitis | SARS-CoV-2 Group      | 86,998 | 46    | 0 (0%)      | 46 (100%)   |
|                                  | 2020 Comparison Group | 86,998 | 26    | 0 (0%)      | 26 (100%)   |
| <b>Others</b>                    |                       |        |       |             |             |
| Sleep Apnea                      | SARS-CoV-2 Group      | 71,054 | 749   | 118 (16%)   | 631 (84%)   |
|                                  | 2020 Comparison Group | 71,054 | 542   | 77 (14%)    | 465 (86%)   |
| <b>Hematology</b>                |                       |        |       |             |             |
| Thrombocytopenia                 | SARS-CoV-2 Group      | 83,309 | 594   | 130 (22%)   | 464 (78%)   |
|                                  | 2020 Comparison Group | 83,309 | 367   | 22 (6%)     | 345 (94%)   |
| Leukopenia                       | SARS-CoV-2 Group      | 86,276 | 203   | 38 (19%)    | 165 (81%)   |
|                                  | 2020 Comparison Group | 86,276 | 101   | 1 (1%)      | 100 (99%)   |
| Anemia                           | SARS-CoV-2 Group      | 71,891 | 1,657 | 256 (15%)   | 1,401 (85%) |
|                                  | 2020 Comparison Group | 71,891 | 1,095 | 144 (13%)   | 951 (87%)   |
| <b>Symptom</b>                   |                       |        |       |             |             |
| Myalgia                          | SARS-CoV-2 Group      | 51,331 | 2,918 | 315 (11%)   | 2,603 (89%) |
|                                  | 2020 Comparison Group | 51,331 | 2,353 | 158 (6.7%)  | 2,195 (93%) |
| Fatigue Diagnosis                | SARS-CoV-2 Group      | 55,138 | 4,400 | 1,542 (35%) | 2,858 (65%) |

|                     |                       |        |       |             |             |
|---------------------|-----------------------|--------|-------|-------------|-------------|
|                     | 2020 Comparison Group | 55,138 | 2,115 | 167 (7.9%)  | 1,948 (92%) |
| > Fatigue           | SARS-CoV-2 Group      | 55,189 | 4,348 | 1,524 (35%) | 2,824 (65%) |
|                     | 2020 Comparison Group | 55,189 | 2,116 | 167 (7.9%)  | 1,949 (92%) |
| > Chronic Fatigue   | SARS-CoV-2 Group      | 85,443 | 235   | 21 (8.9%)   | 214 (91%)   |
|                     | 2020 Comparison Group | 85,443 | 170   | 5 (2.9%)    | 165 (97%)   |
| > Postviral Fatigue | SARS-CoV-2 Group      | 87,159 | 151   | 19 (13%)    | 132 (87%)   |
|                     | 2020 Comparison Group | 87,159 | 8     | 0 (0%)      | 8 (100%)    |
| Anosmia             | SARS-CoV-2 Group      | 87,212 | 41    | 8 (20%)     | 33 (80%)    |
|                     | 2020 Comparison Group | 87,212 | 23    | 2 (8.7%)    | 21 (91%)    |

Total at Risk counts the number of individuals without the outcome of interest prior to acute phase and whose (and their matched pairs') observation period from the index date are at least 21 days.

Table 6b: Clinical Event Counts by Persistent and New Onset Outcomes of the Matched SARS-CoV-2 Group and 2019 Comparison Group

| <b>Clinical Sequelae</b>                      | <b>Category</b>       | <b>Total at Risk</b> | <b>Total with Post-acute Outcome</b> | <b>Persistent</b> | <b>New Onset</b> |
|-----------------------------------------------|-----------------------|----------------------|--------------------------------------|-------------------|------------------|
| <b>Hypertension</b>                           |                       |                      |                                      |                   |                  |
| Hypertension                                  | SARS-CoV-2 Group      | 3,670                | 357                                  | 120 (34%)         | 237 (66%)        |
|                                               | 2019 Comparison Group | 3,670                | 213                                  | 27 (13%)          | 186 (87%)        |
| <b>Pulmonary Hypertension</b>                 |                       |                      |                                      |                   |                  |
| Pulmonary Hypertension                        | SARS-CoV-2 Group      | 83,090               | 594                                  | 83 (14%)          | 511 (86%)        |
|                                               | 2019 Comparison Group | 83,090               | 539                                  | 39 (7.2%)         | 500 (93%)        |
| <b>Cardiology</b>                             |                       |                      |                                      |                   |                  |
| <b>Cardiac Rhythm Disorders</b>               |                       |                      |                                      |                   |                  |
| Cardiac Rhythm Disorders                      | SARS-CoV-2 Group      | 68,071               | 2,385                                | 568 (24%)         | 1,817 (76%)      |
|                                               | 2019 Comparison Group | 68,071               | 1,672                                | 115 (6.9%)        | 1,557 (93%)      |
| <b>&gt; Cardiac Arrhythmia</b>                |                       |                      |                                      |                   |                  |
| > Cardiac Arrhythmia                          | SARS-CoV-2 Group      | 74,497               | 1,524                                | 264 (17%)         | 1,260 (83%)      |
|                                               | 2019 Comparison Group | 74,497               | 1,252                                | 75 (6%)           | 1,177 (94%)      |
| <b>&gt; Tachycardia</b>                       |                       |                      |                                      |                   |                  |
| > Tachycardia                                 | SARS-CoV-2 Group      | 78,036               | 1,641                                | 329 (20%)         | 1,312 (80%)      |
|                                               | 2019 Comparison Group | 78,036               | 936                                  | 59 (6.3%)         | 877 (94%)        |
| <b>&gt; POTs</b>                              |                       |                      |                                      |                   |                  |
| > POTs                                        | SARS-CoV-2 Group      | 83,542               | 699                                  | 101 (14%)         | 598 (86%)        |
|                                               | 2019 Comparison Group | 83,542               | 549                                  | 21 (3.8%)         | 528 (96%)        |
| <b>CHF<br/>Cardiomyopathy<br/>Myocarditis</b> |                       |                      |                                      |                   |                  |
| CHF<br>Cardiomyopathy<br>Myocarditis          | SARS-CoV-2 Group      | 68,862               | 1,561                                | 521 (33%)         | 1,040 (67%)      |
|                                               | 2019 Comparison Group | 68,862               | 1,143                                | 165 (14%)         | 978 (86%)        |

|                                  |                       |        |       |           |             |
|----------------------------------|-----------------------|--------|-------|-----------|-------------|
| > Congestive Heart Failure       | SARS-CoV-2 Group      | 72,126 | 1,460 | 483 (33%) | 977 (67%)   |
|                                  | 2019 Comparison Group | 72,126 | 1,102 | 159 (14%) | 943 (86%)   |
| > Cardiomyopathy                 | SARS-CoV-2 Group      | 80,232 | 618   | 158 (26%) | 460 (74%)   |
|                                  | 2019 Comparison Group | 80,232 | 502   | 47 (9.4%) | 455 (91%)   |
| > Myocarditis                    | SARS-CoV-2 Group      | 88,052 | 27    | 9 (33%)   | 18 (67%)    |
|                                  | 2019 Comparison Group | 88,052 | 9     | 0 (0%)    | 9 (100%)    |
| Coronary Disease                 | SARS-CoV-2 Group      | 82,259 | 1,051 | 340 (32%) | 711 (68%)   |
|                                  | 2019 Comparison Group | 82,259 | 722   | 66 (9.1%) | 656 (91%)   |
| > Myocardial Infarction          | SARS-CoV-2 Group      | 83,770 | 891   | 316 (35%) | 575 (65%)   |
|                                  | 2019 Comparison Group | 83,770 | 580   | 57 (9.8%) | 523 (90%)   |
| > Acute Coronary Syndrome        | SARS-CoV-2 Group      | 82,278 | 1,045 | 335 (32%) | 710 (68%)   |
|                                  | 2019 Comparison Group | 82,278 | 716   | 65 (9.1%) | 651 (91%)   |
| Cardiogenic Shock                | SARS-CoV-2 Group      | 87,811 | 88    | 18 (20%)  | 70 (80%)    |
|                                  | 2019 Comparison Group | 87,811 | 69    | 3 (4.3%)  | 66 (96%)    |
| Hypercoagulability<br>DVT PE PAO | SARS-CoV-2 Group      | 77,455 | 2,102 | 744 (35%) | 1,358 (65%) |
|                                  | 2019 Comparison Group | 77,455 | 953   | 87 (9.1%) | 866 (91%)   |
| > Hypercoagulability             | SARS-CoV-2 Group      | 80,000 | 1,433 | 352 (25%) | 1,081 (75%) |
|                                  | 2019 Comparison Group | 80,000 | 761   | 68 (8.9%) | 693 (91%)   |

|                                   |                       |        |       |           |             |
|-----------------------------------|-----------------------|--------|-------|-----------|-------------|
| > Deep Vein Thrombosis            | SARS-CoV-2 Group      | 83,208 | 1,043 | 271 (26%) | 772 (74%)   |
|                                   | 2019 Comparison Group | 83,208 | 465   | 48 (10%)  | 417 (90%)   |
| > Pulmonary Embolism              | SARS-CoV-2 Group      | 85,580 | 902   | 445 (49%) | 457 (51%)   |
|                                   | 2019 Comparison Group | 85,580 | 215   | 22 (10%)  | 193 (90%)   |
| > Peripheral Arterial Occlusions  | SARS-CoV-2 Group      | 86,436 | 278   | 52 (19%)  | 226 (81%)   |
|                                   | 2019 Comparison Group | 86,436 | 181   | 11 (6.1%) | 170 (94%)   |
| Stroke and Sequelae               | SARS-CoV-2 Group      | 75,633 | 1,334 | 442 (33%) | 892 (67%)   |
|                                   | 2019 Comparison Group | 75,633 | 982   | 128 (13%) | 854 (87%)   |
| > Ischemic Stroke and Sequelae    | SARS-CoV-2 Group      | 76,547 | 1,203 | 394 (33%) | 809 (67%)   |
|                                   | 2019 Comparison Group | 76,547 | 879   | 113 (13%) | 766 (87%)   |
| > Hemorrhagic Stroke and Sequelae | SARS-CoV-2 Group      | 80,621 | 852   | 299 (35%) | 553 (65%)   |
|                                   | 2019 Comparison Group | 80,621 | 615   | 89 (14%)  | 526 (86%)   |
| <b>Mental Health</b>              |                       |        |       |           |             |
| Mental Health Diagnosis           | SARS-CoV-2 Group      | 52,651 | 2,196 | 374 (17%) | 1,822 (83%) |
|                                   | 2019 Comparison Group | 52,651 | 1,634 | 186 (11%) | 1,448 (89%) |
| Psychosis                         | SARS-CoV-2 Group      | 86,129 | 242   | 38 (16%)  | 204 (84%)   |
|                                   | 2019 Comparison Group | 86,129 | 147   | 9 (6.1%)  | 138 (94%)   |
| <b>Neurologic</b>                 |                       |        |       |           |             |

|                           |                       |        |       |            |             |
|---------------------------|-----------------------|--------|-------|------------|-------------|
| Amnesia/Memory Difficulty | SARS-CoV-2 Group      | 64,113 | 2,585 | 761 (29%)  | 1,824 (71%) |
|                           | 2019 Comparison Group | 64,113 | 1,759 | 156 (8.9%) | 1,603 (91%) |
| Migraine                  | SARS-CoV-2 Group      | 85,739 | 193   | 18 (9.3%)  | 175 (91%)   |
|                           | 2019 Comparison Group | 85,739 | 201   | 19 (9.5%)  | 182 (91%)   |
| Peripheral Neuropathy     | SARS-CoV-2 Group      | 81,805 | 572   | 47 (8.2%)  | 525 (92%)   |
|                           | 2019 Comparison Group | 81,805 | 612   | 51 (8.3%)  | 561 (92%)   |
| Encephalopathy            | SARS-CoV-2 Group      | 80,637 | 1,807 | 672 (37%)  | 1,135 (63%) |
|                           | 2019 Comparison Group | 80,637 | 848   | 80 (9.4%)  | 768 (91%)   |
| Seizure                   | SARS-CoV-2 Group      | 84,615 | 354   | 73 (21%)   | 281 (79%)   |
|                           | 2019 Comparison Group | 84,615 | 280   | 29 (10%)   | 251 (90%)   |
| Dementia                  | SARS-CoV-2 Group      | 62,571 | 1,326 | 412 (31%)  | 914 (69%)   |
|                           | 2019 Comparison Group | 62,571 | 756   | 103 (14%)  | 653 (86%)   |
| Guillain-Barre Syndrome   | SARS-CoV-2 Group      | 88,007 | 15    | 6 (40%)    | 9 (60%)     |
|                           | 2019 Comparison Group | 88,007 | 3     | 2 (67%)    | 1 (33%)     |
| <b>Diabetes</b>           |                       |        |       |            |             |
| Type 2 Diabetes           | SARS-CoV-2 Group      | 32,624 | 709   | 150 (21%)  | 559 (79%)   |
|                           | 2019 Comparison Group | 32,624 | 451   | 47 (10%)   | 404 (90%)   |
| <b>Liver</b>              |                       |        |       |            |             |
| Liver Test Abnormality    | SARS-CoV-2 Group      | 78,790 | 1,019 | 113 (11%)  | 906 (89%)   |

|                               |                       |        |       |             |             |
|-------------------------------|-----------------------|--------|-------|-------------|-------------|
|                               | 2019 Comparison Group | 78,790 | 875   | 49 (5.6%)   | 826 (94%)   |
| <b>Nephrology</b>             |                       |        |       |             |             |
| Kidney Injury                 | SARS-CoV-2 Group      | 48,691 | 2,549 | 1,051 (41%) | 1,498 (59%) |
|                               | 2019 Comparison Group | 48,691 | 1,757 | 197 (11%)   | 1,560 (89%) |
| > Chronic Kidney Disease      | SARS-CoV-2 Group      | 51,816 | 1,669 | 448 (27%)   | 1,221 (73%) |
|                               | 2019 Comparison Group | 51,816 | 1,551 | 183 (12%)   | 1,368 (88%) |
| > Acute Kidney Injury         | SARS-CoV-2 Group      | 74,827 | 2,874 | 1,416 (49%) | 1,458 (51%) |
|                               | 2019 Comparison Group | 74,827 | 1,422 | 117 (8.2%)  | 1,305 (92%) |
| <b>Respiratory</b>            |                       |        |       |             |             |
| Respiratory Failure           | SARS-CoV-2 Group      | 76,155 | 6,004 | 4,588 (76%) | 1,416 (24%) |
|                               | 2019 Comparison Group | 76,155 | 1,230 | 114 (9.3%)  | 1,116 (91%) |
| > Acute Respiratory Failure   | SARS-CoV-2 Group      | 80,953 | 5,768 | 4,589 (80%) | 1,179 (20%) |
|                               | 2019 Comparison Group | 80,953 | 960   | 84 (8.8%)   | 876 (91%)   |
| > Chronic Respiratory Failure | SARS-CoV-2 Group      | 84,758 | 859   | 188 (22%)   | 671 (78%)   |
|                               | 2019 Comparison Group | 84,758 | 288   | 33 (11%)    | 255 (89%)   |
| > Interstitial Lung Disease   | SARS-CoV-2 Group      | 84,074 | 818   | 120 (15%)   | 698 (85%)   |
|                               | 2019 Comparison Group | 84,074 | 411   | 25 (6.1%)   | 386 (94%)   |
| <b>Dermatologic</b>           |                       |        |       |             |             |
| Atopic Dermatitis             | SARS-CoV-2 Group      | 86,366 | 158   | 9 (5.7%)    | 149 (94%)   |



|                                  |                       |        |       |             |             |
|----------------------------------|-----------------------|--------|-------|-------------|-------------|
|                                  | 2019 Comparison Group | 86,366 | 195   | 11 (5.6%)   | 184 (94%)   |
| Urticaria                        | SARS-CoV-2 Group      | 87,032 | 111   | 6 (5.4%)    | 105 (95%)   |
|                                  | 2019 Comparison Group | 87,032 | 132   | 13 (9.8%)   | 119 (90%)   |
| Herpesviral Vesicular Dermatitis | SARS-CoV-2 Group      | 87,739 | 49    | 0 (0%)      | 49 (100%)   |
|                                  | 2019 Comparison Group | 87,739 | 46    | 0 (0%)      | 46 (100%)   |
| <b>Others</b>                    |                       |        |       |             |             |
| Sleep Apnea                      | SARS-CoV-2 Group      | 71,832 | 755   | 119 (16%)   | 636 (84%)   |
|                                  | 2019 Comparison Group | 71,832 | 751   | 98 (13%)    | 653 (87%)   |
| <b>Hematology</b>                |                       |        |       |             |             |
| Thrombocytopenia                 | SARS-CoV-2 Group      | 84,040 | 602   | 135 (22%)   | 467 (78%)   |
|                                  | 2019 Comparison Group | 84,040 | 353   | 24 (6.8%)   | 329 (93%)   |
| Leukopenia                       | SARS-CoV-2 Group      | 86,998 | 192   | 38 (20%)    | 154 (80%)   |
|                                  | 2019 Comparison Group | 86,998 | 96    | 6 (6.2%)    | 90 (94%)    |
| Anemia                           | SARS-CoV-2 Group      | 72,106 | 1,664 | 257 (15%)   | 1,407 (85%) |
|                                  | 2019 Comparison Group | 72,106 | 1,211 | 132 (11%)   | 1,079 (89%) |
| <b>Symptom</b>                   |                       |        |       |             |             |
| Myalgia                          | SARS-CoV-2 Group      | 47,963 | 2,749 | 319 (12%)   | 2,430 (88%) |
|                                  | 2019 Comparison Group | 47,963 | 2,542 | 195 (7.7%)  | 2,347 (92%) |
| Fatigue Diagnosis                | SARS-CoV-2 Group      | 51,450 | 4,153 | 1,492 (36%) | 2,661 (64%) |

|                     |                       |        |       |             |             |
|---------------------|-----------------------|--------|-------|-------------|-------------|
|                     | 2019 Comparison Group | 51,450 | 2,521 | 200 (7.9%)  | 2,321 (92%) |
| > Fatigue           | SARS-CoV-2 Group      | 51,499 | 4,109 | 1,478 (36%) | 2,631 (64%) |
|                     | 2019 Comparison Group | 51,499 | 2,521 | 200 (7.9%)  | 2,321 (92%) |
| > Chronic Fatigue   | SARS-CoV-2 Group      | 85,926 | 235   | 24 (10%)    | 211 (90%)   |
|                     | 2019 Comparison Group | 85,926 | 264   | 13 (4.9%)   | 251 (95%)   |
| > Postviral Fatigue | SARS-CoV-2 Group      | 87,890 | 153   | 16 (10%)    | 137 (90%)   |
|                     | 2019 Comparison Group | 87,890 | 14    | 0 (0%)      | 14 (100%)   |
| Anosmia             | SARS-CoV-2 Group      | 87,934 | 48    | 10 (21%)    | 38 (79%)    |
|                     | 2019 Comparison Group | 87,934 | 14    | 1 (7.1%)    | 13 (93%)    |

Total at Risk counts the number of individuals without the outcome of interest prior to acute phase and whose (and their matched pairs') observation period from the index date are at least 21 days.

Table 6c: Clinical Event Counts by Persistent and New Onset Outcomes of the Matched SARS-CoV-2 Group and Viral LRTI Comparison Group

| Clinical Sequelae                     | Category                    | Total at Risk | Total with Post-acute Outcome | Persistent  | New Onset   |
|---------------------------------------|-----------------------------|---------------|-------------------------------|-------------|-------------|
| <b>Hypertension</b>                   |                             |               |                               |             |             |
| Hypertension                          | SARS-CoV-2 Group            | 3,410         | 402                           | 147 (37%)   | 255 (63%)   |
|                                       | Viral LRTI Comparison Group | 3,410         | 374                           | 154 (41%)   | 220 (59%)   |
| <b>Pulmonary Hypertension</b>         |                             |               |                               |             |             |
| Pulmonary Hypertension                | SARS-CoV-2 Group            | 69,475        | 521                           | 72 (14%)    | 449 (86%)   |
|                                       | Viral LRTI Comparison Group | 69,475        | 880                           | 174 (20%)   | 706 (80%)   |
| <b>Cardiology</b>                     |                             |               |                               |             |             |
| <b>Cardiac Rhythm Disorders</b>       |                             |               |                               |             |             |
| Cardiac Rhythm Disorders              | SARS-CoV-2 Group            | 58,069        | 2,136                         | 504 (24%)   | 1,632 (76%) |
|                                       | Viral LRTI Comparison Group | 58,069        | 2,437                         | 575 (24%)   | 1,862 (76%) |
| <b>&gt; Cardiac Arrhythmia</b>        |                             |               |                               |             |             |
| > Cardiac Arrhythmia                  | SARS-CoV-2 Group            | 63,063        | 1,343                         | 225 (17%)   | 1,118 (83%) |
|                                       | Viral LRTI Comparison Group | 63,063        | 1,619                         | 285 (18%)   | 1,334 (82%) |
| <b>&gt; Tachycardia</b>               |                             |               |                               |             |             |
| > Tachycardia                         | SARS-CoV-2 Group            | 65,796        | 1,433                         | 287 (20%)   | 1,146 (80%) |
|                                       | Viral LRTI Comparison Group | 65,796        | 1,502                         | 304 (20%)   | 1,198 (80%) |
| <b>&gt; POTs</b>                      |                             |               |                               |             |             |
| > POTs                                | SARS-CoV-2 Group            | 69,943        | 604                           | 94 (16%)    | 510 (84%)   |
|                                       | Viral LRTI Comparison Group | 69,943        | 721                           | 76 (11%)    | 645 (89%)   |
| <b>CHF Cardiomyopathy Myocarditis</b> |                             |               |                               |             |             |
| CHF Cardiomyopathy Myocarditis        | SARS-CoV-2 Group            | 58,232        | 1,436                         | 486 (34%)   | 950 (66%)   |
|                                       | Viral LRTI Comparison Group | 58,232        | 2,619                         | 1,250 (48%) | 1,369 (52%) |

|                                  |                             |        |       |             |             |
|----------------------------------|-----------------------------|--------|-------|-------------|-------------|
| > Congestive Heart Failure       | SARS-CoV-2 Group            | 60,761 | 1,346 | 442 (33%)   | 904 (67%)   |
|                                  | Viral LRTI Comparison Group | 60,761 | 2,460 | 1,162 (47%) | 1,298 (53%) |
| > Cardiomyopathy                 | SARS-CoV-2 Group            | 67,424 | 560   | 143 (26%)   | 417 (74%)   |
|                                  | Viral LRTI Comparison Group | 67,424 | 944   | 297 (31%)   | 647 (69%)   |
| > Myocarditis                    | SARS-CoV-2 Group            | 73,472 | 17    | 7 (41%)     | 10 (59%)    |
|                                  | Viral LRTI Comparison Group | 73,472 | 12    | 0 (0%)      | 12 (100%)   |
| Coronary Disease                 | SARS-CoV-2 Group            | 68,872 | 854   | 284 (33%)   | 570 (67%)   |
|                                  | Viral LRTI Comparison Group | 68,872 | 1,240 | 489 (39%)   | 751 (61%)   |
| > Myocardial Infarction          | SARS-CoV-2 Group            | 70,052 | 724   | 271 (37%)   | 453 (63%)   |
|                                  | Viral LRTI Comparison Group | 70,052 | 1,040 | 448 (43%)   | 592 (57%)   |
| > Acute Coronary Syndrome        | SARS-CoV-2 Group            | 68,896 | 844   | 277 (33%)   | 567 (67%)   |
|                                  | Viral LRTI Comparison Group | 68,896 | 1,235 | 485 (39%)   | 750 (61%)   |
| Cardiogenic Shock                | SARS-CoV-2 Group            | 73,271 | 75    | 13 (17%)    | 62 (83%)    |
|                                  | Viral LRTI Comparison Group | 73,271 | 139   | 31 (22%)    | 108 (78%)   |
| Hypercoagulability<br>DVT PE PAO | SARS-CoV-2 Group            | 65,065 | 1,803 | 630 (35%)   | 1,173 (65%) |
|                                  | Viral LRTI Comparison Group | 65,065 | 1,734 | 598 (34%)   | 1,136 (66%) |
| > Hypercoagulability             | SARS-CoV-2 Group            | 67,118 | 1,247 | 300 (24%)   | 947 (76%)   |
|                                  | Viral LRTI Comparison Group | 67,118 | 1,280 | 350 (27%)   | 930 (73%)   |

|                                   |                             |        |       |           |             |
|-----------------------------------|-----------------------------|--------|-------|-----------|-------------|
| > Deep Vein Thrombosis            | SARS-CoV-2 Group            | 69,588 | 893   | 231 (26%) | 662 (74%)   |
|                                   | Viral LRTI Comparison Group | 69,588 | 901   | 271 (30%) | 630 (70%)   |
| > Pulmonary Embolism              | SARS-CoV-2 Group            | 71,480 | 745   | 366 (49%) | 379 (51%)   |
|                                   | Viral LRTI Comparison Group | 71,480 | 645   | 320 (50%) | 325 (50%)   |
| > Peripheral Arterial Occlusions  | SARS-CoV-2 Group            | 72,173 | 222   | 43 (19%)  | 179 (81%)   |
|                                   | Viral LRTI Comparison Group | 72,173 | 271   | 43 (16%)  | 228 (84%)   |
| Stroke and Sequelae               | SARS-CoV-2 Group            | 63,886 | 1,179 | 379 (32%) | 800 (68%)   |
|                                   | Viral LRTI Comparison Group | 63,886 | 1,447 | 467 (32%) | 980 (68%)   |
| > Ischemic Stroke and Sequelae    | SARS-CoV-2 Group            | 64,568 | 1,068 | 335 (31%) | 733 (69%)   |
|                                   | Viral LRTI Comparison Group | 64,568 | 1,274 | 389 (31%) | 885 (69%)   |
| > Hemorrhagic Stroke and Sequelae | SARS-CoV-2 Group            | 67,907 | 758   | 257 (34%) | 501 (66%)   |
|                                   | Viral LRTI Comparison Group | 67,907 | 936   | 353 (38%) | 583 (62%)   |
| <b>Mental Health</b>              |                             |        |       |           |             |
| Mental Health Diagnosis           | SARS-CoV-2 Group            | 45,771 | 2,023 | 368 (18%) | 1,655 (82%) |
|                                   | Viral LRTI Comparison Group | 45,771 | 2,093 | 378 (18%) | 1,715 (82%) |
| Psychosis                         | SARS-CoV-2 Group            | 72,164 | 204   | 36 (18%)  | 168 (82%)   |
|                                   | Viral LRTI Comparison Group | 72,164 | 175   | 21 (12%)  | 154 (88%)   |
| <b>Neurologic</b>                 |                             |        |       |           |             |

|                           |                             |        |       |           |             |
|---------------------------|-----------------------------|--------|-------|-----------|-------------|
| Amnesia/Memory Difficulty | SARS-CoV-2 Group            | 55,791 | 2,418 | 725 (30%) | 1,693 (70%) |
|                           | Viral LRTI Comparison Group | 55,791 | 2,447 | 753 (31%) | 1,694 (69%) |
| Migraine                  | SARS-CoV-2 Group            | 71,645 | 170   | 16 (9.4%) | 154 (91%)   |
|                           | Viral LRTI Comparison Group | 71,645 | 213   | 21 (9.9%) | 192 (90%)   |
| Peripheral Neuropathy     | SARS-CoV-2 Group            | 68,552 | 486   | 43 (8.8%) | 443 (91%)   |
|                           | Viral LRTI Comparison Group | 68,552 | 651   | 66 (10%)  | 585 (90%)   |
| Encephalopathy            | SARS-CoV-2 Group            | 67,876 | 1,545 | 560 (36%) | 985 (64%)   |
|                           | Viral LRTI Comparison Group | 67,876 | 1,418 | 489 (34%) | 929 (66%)   |
| Seizure                   | SARS-CoV-2 Group            | 70,853 | 315   | 70 (22%)  | 245 (78%)   |
|                           | Viral LRTI Comparison Group | 70,853 | 346   | 96 (28%)  | 250 (72%)   |
| Dementia                  | SARS-CoV-2 Group            | 55,765 | 1,277 | 367 (29%) | 910 (71%)   |
|                           | Viral LRTI Comparison Group | 55,765 | 1,057 | 350 (33%) | 707 (67%)   |
| Guillain-Barre Syndrome   | SARS-CoV-2 Group            | 73,441 | 9     | 4 (44%)   | 5 (56%)     |
|                           | Viral LRTI Comparison Group | 73,441 | 10    | 6 (60%)   | 4 (40%)     |
| <b>Diabetes</b>           |                             |        |       |           |             |
| Type 2 Diabetes           | SARS-CoV-2 Group            | 29,247 | 698   | 135 (19%) | 563 (81%)   |
|                           | Viral LRTI Comparison Group | 29,247 | 593   | 130 (22%) | 463 (78%)   |
| <b>Liver</b>              |                             |        |       |           |             |
| Liver Test Abnormality    | SARS-CoV-2 Group            | 66,469 | 881   | 88 (10%)  | 793 (90%)   |

|                               |                             |        |       |             |             |
|-------------------------------|-----------------------------|--------|-------|-------------|-------------|
|                               | Viral LRTI Comparison Group | 66,469 | 1,070 | 171 (16%)   | 899 (84%)   |
| <b>Nephrology</b>             |                             |        |       |             |             |
| Kidney Injury                 | SARS-CoV-2 Group            | 42,309 | 2,328 | 977 (42%)   | 1,351 (58%) |
|                               | Viral LRTI Comparison Group | 42,309 | 2,365 | 948 (40%)   | 1,417 (60%) |
| > Chronic Kidney Disease      | SARS-CoV-2 Group            | 45,030 | 1,530 | 421 (28%)   | 1,109 (72%) |
|                               | Viral LRTI Comparison Group | 45,030 | 1,828 | 563 (31%)   | 1,265 (69%) |
| > Acute Kidney Injury         | SARS-CoV-2 Group            | 63,023 | 2,527 | 1,249 (49%) | 1,278 (51%) |
|                               | Viral LRTI Comparison Group | 63,023 | 2,571 | 1,088 (42%) | 1,483 (58%) |
| <b>Respiratory</b>            |                             |        |       |             |             |
| Respiratory Failure           | SARS-CoV-2 Group            | 63,459 | 5,061 | 3,870 (76%) | 1,191 (24%) |
|                               | Viral LRTI Comparison Group | 63,459 | 3,462 | 1,739 (50%) | 1,723 (50%) |
| > Acute Respiratory Failure   | SARS-CoV-2 Group            | 67,705 | 4,888 | 3,885 (79%) | 1,003 (21%) |
|                               | Viral LRTI Comparison Group | 67,705 | 2,714 | 1,435 (53%) | 1,279 (47%) |
| > Chronic Respiratory Failure | SARS-CoV-2 Group            | 70,547 | 762   | 161 (21%)   | 601 (79%)   |
|                               | Viral LRTI Comparison Group | 70,547 | 971   | 263 (27%)   | 708 (73%)   |
| > Interstitial Lung Disease   | SARS-CoV-2 Group            | 70,052 | 687   | 96 (14%)    | 591 (86%)   |
|                               | Viral LRTI Comparison Group | 70,052 | 957   | 218 (23%)   | 739 (77%)   |
| <b>Dermatologic</b>           |                             |        |       |             |             |
| Atopic Dermatitis             | SARS-CoV-2 Group            | 72,124 | 153   | 5 (3.3%)    | 148 (97%)   |

|                                  |                             |        |       |             |             |
|----------------------------------|-----------------------------|--------|-------|-------------|-------------|
|                                  | Viral LRTI Comparison Group | 72,124 | 185   | 12 (6.5%)   | 173 (94%)   |
| Urticaria                        | SARS-CoV-2 Group            | 72,649 | 113   | 5 (4.4%)    | 108 (96%)   |
|                                  | Viral LRTI Comparison Group | 72,649 | 140   | 6 (4.3%)    | 134 (96%)   |
| Herpesviral Vesicular Dermatitis | SARS-CoV-2 Group            | 73,211 | 48    | 0 (0%)      | 48 (100%)   |
|                                  | Viral LRTI Comparison Group | 73,211 | 41    | 3 (7.3%)    | 38 (93%)    |
| <b>Others</b>                    |                             |        |       |             |             |
| Sleep Apnea                      | SARS-CoV-2 Group            | 60,991 | 644   | 98 (15%)    | 546 (85%)   |
|                                  | Viral LRTI Comparison Group | 60,991 | 1,053 | 207 (20%)   | 846 (80%)   |
| <b>Hematology</b>                |                             |        |       |             |             |
| Thrombocytopenia                 | SARS-CoV-2 Group            | 70,289 | 481   | 95 (20%)    | 386 (80%)   |
|                                  | Viral LRTI Comparison Group | 70,289 | 584   | 127 (22%)   | 457 (78%)   |
| Leukopenia                       | SARS-CoV-2 Group            | 72,646 | 166   | 31 (19%)    | 135 (81%)   |
|                                  | Viral LRTI Comparison Group | 72,646 | 157   | 12 (7.6%)   | 145 (92%)   |
| Anemia                           | SARS-CoV-2 Group            | 61,005 | 1,492 | 235 (16%)   | 1,257 (84%) |
|                                  | Viral LRTI Comparison Group | 61,005 | 1,602 | 318 (20%)   | 1,284 (80%) |
| <b>Symptom</b>                   |                             |        |       |             |             |
| Myalgia                          | SARS-CoV-2 Group            | 40,418 | 2,415 | 291 (12%)   | 2,124 (88%) |
|                                  | Viral LRTI Comparison Group | 40,418 | 2,842 | 360 (13%)   | 2,482 (87%) |
| Fatigue Diagnosis                | SARS-CoV-2 Group            | 43,201 | 3,651 | 1,273 (35%) | 2,378 (65%) |



|                     |                             |        |       |             |             |
|---------------------|-----------------------------|--------|-------|-------------|-------------|
|                     | Viral LRTI Comparison Group | 43,201 | 3,711 | 1,234 (33%) | 2,477 (67%) |
| > Fatigue           | SARS-CoV-2 Group            | 43,262 | 3,610 | 1,259 (35%) | 2,351 (65%) |
|                     | Viral LRTI Comparison Group | 43,262 | 3,707 | 1,231 (33%) | 2,476 (67%) |
| > Chronic Fatigue   | SARS-CoV-2 Group            | 71,738 | 207   | 18 (8.7%)   | 189 (91%)   |
|                     | Viral LRTI Comparison Group | 71,738 | 244   | 10 (4.1%)   | 234 (96%)   |
| > Postviral Fatigue | SARS-CoV-2 Group            | 73,336 | 128   | 14 (11%)    | 114 (89%)   |
|                     | Viral LRTI Comparison Group | 73,336 | 33    | 2 (6.1%)    | 31 (94%)    |
| Anosmia             | SARS-CoV-2 Group            | 73,379 | 37    | 7 (19%)     | 30 (81%)    |
|                     | Viral LRTI Comparison Group | 73,379 | 29    | 3 (10%)     | 26 (90%)    |

Total at Risk counts the number of individuals without the outcome of interest prior to acute phase and whose (and their matched pairs') observation period from the index date are at least 21 days.
